# Supplementary material for: Changes in demographics, clinical practices and long-term outcomes of patients with ST segment-elevation myocardial infarction who underwent coronary revascularisation in the past two decades: cohort study
Source: PubMed Central journal article supplement — BMJ Open. 2021 Mar 31;11(3):e043683. doi: 10.1136/bmjopen-2020-043683 (PMC8016093; doi:10.1136/bmjopen-2020-043683), 2021-03-31
Supplement: bmjopen-2020-043683.draft_revisions.pdf [file bmjopen-2020-043683.draft_revisions.pdf]

# BMJ Open

BMJ Open is committed to open peer review. As part of this commitment we make the peer review history of every article we publish publicly available.

When an article is published we post the peer reviewers' comments and the authors' responses online. We also post the versions of the paper that were used during peer review. These are the versions that the peer review comments apply to.

The versions of the paper that follow are the versions that were submitted during the peer review process. They are not the versions of record or the final published versions. They should not be cited or distributed as the published version of this manuscript.

BMJ Open is an open access journal and the full, final, typeset and author-corrected version of record of the manuscript is available on our site with no access controls, subscription charges or pay-per-view fees (<http://bmjopen.bmj.com>).

If you have any questions on BMJ Open's open peer review process please email [info.bmjopen@bmj.com](mailto:info.bmjopen@bmj.com)

# BMJ Open

## Demographics, Clinical Practices, and Long-term Outcomes of Patients with ST-segment-elevation Myocardial Infarction in the Past Two Decades: CREDO-Kyoto Acute Myocardial Infarction Registry Wave-1 and Wave-2

|                               |                                                                                                                                                                                                                                                                                                                                                                                                                                                                                                                                                                                                                                                                                                                                                                                                                                                                                                                                                                                                                                                                                                                                                                                                                                                                                                                                                                                                                                                                                                                                                                                                                                                                                                                                                                                                                                                                                                                                                                                                                                                                                                                                                                                                                                                                                        |
|-------------------------------|----------------------------------------------------------------------------------------------------------------------------------------------------------------------------------------------------------------------------------------------------------------------------------------------------------------------------------------------------------------------------------------------------------------------------------------------------------------------------------------------------------------------------------------------------------------------------------------------------------------------------------------------------------------------------------------------------------------------------------------------------------------------------------------------------------------------------------------------------------------------------------------------------------------------------------------------------------------------------------------------------------------------------------------------------------------------------------------------------------------------------------------------------------------------------------------------------------------------------------------------------------------------------------------------------------------------------------------------------------------------------------------------------------------------------------------------------------------------------------------------------------------------------------------------------------------------------------------------------------------------------------------------------------------------------------------------------------------------------------------------------------------------------------------------------------------------------------------------------------------------------------------------------------------------------------------------------------------------------------------------------------------------------------------------------------------------------------------------------------------------------------------------------------------------------------------------------------------------------------------------------------------------------------------|
| Journal:                      | <i>BMJ Open</i>                                                                                                                                                                                                                                                                                                                                                                                                                                                                                                                                                                                                                                                                                                                                                                                                                                                                                                                                                                                                                                                                                                                                                                                                                                                                                                                                                                                                                                                                                                                                                                                                                                                                                                                                                                                                                                                                                                                                                                                                                                                                                                                                                                                                                                                                        |
| Manuscript ID                 | bmjopen-2020-043683                                                                                                                                                                                                                                                                                                                                                                                                                                                                                                                                                                                                                                                                                                                                                                                                                                                                                                                                                                                                                                                                                                                                                                                                                                                                                                                                                                                                                                                                                                                                                                                                                                                                                                                                                                                                                                                                                                                                                                                                                                                                                                                                                                                                                                                                    |
| Article Type:                 | Original research                                                                                                                                                                                                                                                                                                                                                                                                                                                                                                                                                                                                                                                                                                                                                                                                                                                                                                                                                                                                                                                                                                                                                                                                                                                                                                                                                                                                                                                                                                                                                                                                                                                                                                                                                                                                                                                                                                                                                                                                                                                                                                                                                                                                                                                                      |
| Date Submitted by the Author: | 12-Aug-2020                                                                                                                                                                                                                                                                                                                                                                                                                                                                                                                                                                                                                                                                                                                                                                                                                                                                                                                                                                                                                                                                                                                                                                                                                                                                                                                                                                                                                                                                                                                                                                                                                                                                                                                                                                                                                                                                                                                                                                                                                                                                                                                                                                                                                                                                            |
| Complete List of Authors:     | <p>Takeji, Yasuaki; Kyoto University Graduate School of Medicine Faculty of Medicine<br/>         Shiomi, Hiroki; Kyoto University Graduate School of Medicine Faculty of Medicine, Department of Cardiovascular Medicine<br/>         Morimoto, Takeshi; Hyogo College of Medicine, Clinical Epidemiology<br/>         Yoshikawa, Yusuke; Kyoto University Graduate School of Medicine Faculty of Medicine, Department of Cardiovascular Medicine<br/>         Taniguchi, Ryoji; Hyogo Prefectural Amagasaki General Medical Center, Division of Cardiology<br/>         Mutsumura-Nakano, Yukiko; Kyoto University Graduate School of Medicine Faculty of Medicine<br/>         Yamamoto, Ko; Kyoto University Graduate School of Medicine Faculty of Medicine<br/>         Yamaji, Kyohei; Kokura Memorial Hospital, Division of Cardiology<br/>         Tazaki, Junichi; Kyoto University Graduate School of Medicine Faculty of Medicine, Department of Cardiovascular Medicine<br/>         Kato, Eri; Kyoto University Graduate School of Medicine Faculty of Medicine<br/>         Watanabe, Hiroto; Kyoto University Graduate School of Medicine Faculty of Medicine, Department of Cardiovascular Medicine<br/>         Yamamoto, Erika; Kyoto University Graduate School of Medicine Faculty of Medicine<br/>         Yamashita, Yugo; Kyoto University Graduate School of Medicine Faculty of Medicine<br/>         Fuki, Masayuki; Kyoto University Graduate School of Medicine Faculty of Medicine<br/>         Suwa, Satoru; Juntendo Shizuoka Hospital<br/>         Inoko, Moriaki; Kitano Hospital<br/>         Takeda, Teruki; Koto Memorial Hospital<br/>         Shirotani, Manabu; Kinki University School of Medicine Nara Hospital<br/>         Ehara, Natsuhiko; Kobe City Medical Center General Hospital<br/>         Ishii, Katsuhisa; Kansai Denryoku Hospital<br/>         Inada, Tsukasa; Osaka Red Cross Hospital, Cardiology<br/>         Onodera, Tomoya; Shizuoka City Shizuoka Hospital<br/>         Shinoda, Eiji; Hamamatsu Rosai Hospital<br/>         Yamamoto, Takashi; Shiga University of Medical Science, Department of Cardiovascular and Respiratory Medicine<br/>         Watanabe, Hiroki; Japan Red Cross Wakayama Medical Center,</p> |

1  
2  
3  
4  
5  
6  
7  
8  
9  
10  
11  
12  
13  
14  
15  
16  
17  
18  
19  
20  
21  
22  
23  
24  
25  
26  
27  
28  
29  
30  
31  
32  
33  
34  
35  
36  
37  
38  
39  
40  
41  
42  
43  
44  
45  
46  
47  
48  
49  
50  
51  
52  
53  
54  
55  
56  
57  
58  
59  
60

|                  |                                                                                                                                                                                                                                                                                                                                                                                                                                                                                                                                                                                                                                                                                                                                                                                                                                                                                              |
|------------------|----------------------------------------------------------------------------------------------------------------------------------------------------------------------------------------------------------------------------------------------------------------------------------------------------------------------------------------------------------------------------------------------------------------------------------------------------------------------------------------------------------------------------------------------------------------------------------------------------------------------------------------------------------------------------------------------------------------------------------------------------------------------------------------------------------------------------------------------------------------------------------------------|
|                  | <p>Department of Cardiovascular medicine<br/> Yaku, Hidenori; Mitsubishi Kyoto Hospital<br/> Nakatsuma, Kenji; Mitsubishi Kyoto Hospital<br/> Sakamoto, Hiroki; Shizuoka General Hospital<br/> Ando, Kenji; Kokura Memorial Hospital, Division of Cardiology<br/> Soga, Yoshiharu; Kokura Memorial Hospital<br/> Furukawa, Yutaka; Kobe City Medical Center General Hospital<br/> Sato, Yukihiro; Hyogo Prefectural Amagasaki Hospital<br/> Nakagawa, Yoshihisa; Shiga University of Medical Science Hospital<br/> Kadota, Kazushige; Kurashiki Central Hospital<br/> Komiya, Tatsuhiko; Kurashiki Central Hospital<br/> Minatoya, Kenji; Kyoto University Graduate School of Medicine Faculty of<br/> Medicine, Department of Cardiovascular Surgery<br/> Kimura, Takeshi; Kyoto University Graduate School of Medicine Faculty<br/> of Medicine, Department of Cardiovascular Medicine</p> |
| <p>Keywords:</p> | <p>Myocardial infarction &lt; CARDIOLOGY, Coronary intervention &lt;<br/> CARDIOLOGY, Coronary heart disease &lt; CARDIOLOGY</p>                                                                                                                                                                                                                                                                                                                                                                                                                                                                                                                                                                                                                                                                                                                                                             |
|                  |                                                                                                                                                                                                                                                                                                                                                                                                                                                                                                                                                                                                                                                                                                                                                                                                                                                                                              |

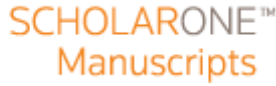

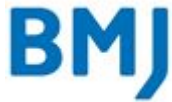

I, the Submitting Author has the right to grant and does grant on behalf of all authors of the Work (as defined in the below author licence), an exclusive licence and/or a non-exclusive licence for contributions from authors who are: i) UK Crown employees; ii) where BMJ has agreed a CC-BY licence shall apply, and/or iii) in accordance with the terms applicable for US Federal Government officers or employees acting as part of their official duties; on a worldwide, perpetual, irrevocable, royalty-free basis to BMJ Publishing Group Ltd ("BMJ") its licensees and where the relevant Journal is co-owned by BMJ to the co-owners of the Journal, to publish the Work in this journal and any other BMJ products and to exploit all rights, as set out in our [licence](#).

The Submitting Author accepts and understands that any supply made under these terms is made by BMJ to the Submitting Author unless you are acting as an employee on behalf of your employer or a postgraduate student of an affiliated institution which is paying any applicable article publishing charge ("APC") for Open Access articles. Where the Submitting Author wishes to make the Work available on an Open Access basis (and intends to pay the relevant APC), the terms of reuse of such Open Access shall be governed by a Creative Commons licence – details of these licences and which [Creative Commons](#) licence will apply to this Work are set out in our licence referred to above.

Other than as permitted in any relevant BMJ Author's Self Archiving Policies, I confirm this Work has not been accepted for publication elsewhere, is not being considered for publication elsewhere and does not duplicate material already published. I confirm all authors consent to publication of this Work and authorise the granting of this licence.

1  
2  
3 **Title:** Demographics, Clinical Practices, and Long-term Outcomes of Patients  
4  
5  
6 with ST-segment-elevation Myocardial Infarction in the Past Two Decades:  
7  
8  
9 CREDO-Kyoto Acute Myocardial Infarction Registry Wave-1 and Wave-2  
10

11  
12  
13 **Authors**  
14

15  
16 Yasuaki Takeji, M.D.<sup>1</sup>, Hiroki Shiomi, M.D.<sup>1</sup>, Takeshi Morimoto, M.D.<sup>2</sup>, Yusuke  
17  
18 Yoshikawa, M.D.<sup>1</sup>, Ryoji Taniguchi, M.D.<sup>3</sup>, Yukiko Nakano, M.D.<sup>1</sup>, Ko Yamamoto, M.D.<sup>1</sup>,  
19  
20 Kyohei Yamaji, M.D.<sup>4</sup>, Junichi Tazaki, M.D.<sup>1</sup>, Eri Toda Kato, M.D.<sup>1</sup>, Hirotoshi Watanabe,  
21  
22 M.D.<sup>1</sup>, Erika Yamamoto, M.D.<sup>1</sup>, Yugo Yamashita, M.D.<sup>1</sup>, Masayuki Fuki, M.D.<sup>1</sup>, Satoru  
23  
24 Suwa, M.D.<sup>5</sup>, Moriaki Inoko, M.D.<sup>6</sup>, Teruki Takeda, M.D.<sup>7</sup>, Manabu Shirotani, M.D.<sup>8</sup>,  
25  
26 Natsuhiko Ehara, M.D.<sup>9</sup>, Katsuhisa Ishii, M.D.<sup>10</sup>, Tsukasa Inada, M.D.<sup>11</sup>, Tomoya Onodera,  
27  
28 M.D.<sup>12</sup>, Eiji Shinoda, M.D.<sup>13</sup>, Takashi Yamamoto, M.D.<sup>14</sup>, Hiroki Watanabe, M.D.<sup>15</sup>,  
29  
30 Hidenori Yaku, M.D.<sup>16</sup>, Kenji Nakatsuma, M.D.<sup>16</sup>, Hiroki Sakamoto, M.D.<sup>17</sup>, Kenji Ando,  
31  
32 M.D.<sup>4</sup>, Yoshiharu Soga, M.D.<sup>18</sup>, Yutaka Furukawa, M.D.<sup>9</sup>, Yukihiro Sato, M.D.<sup>3</sup>, Yoshihisa  
33  
34 Nakagawa, M.D.<sup>14</sup>, Kazushige Kadota, M.D.<sup>19</sup>, Tatsuhiko Komiya, M.D.<sup>20</sup>, Kenji Minatoya,  
35  
36 M.D.<sup>21</sup>, Takeshi Kimura, M.D.<sup>1</sup>; the CREDO-Kyoto AMI Registry Wave-1 and the CREDO-  
37  
38 Kyoto AMI Registry Wave-2 Investigators.  
39  
40  
41  
42  
43  
44

45  
46 **Affiliations**  
47

48 <sup>1</sup>Department of Cardiovascular Medicine, Graduate School of Medicine, Kyoto University,  
49  
50 Kyoto, Japan; <sup>2</sup>Department of Clinical Epidemiology, Hyogo College of Medicine,  
51  
52 Nishinomiya, Japan; <sup>3</sup>Department of Cardiology, Hyogo Prefectural Amagasaki Hospital,  
53  
54 Amagasaki, Japan; <sup>4</sup>Division of Cardiology, Kokura Memorial Hospital, Kitakyushu, Japan;  
55  
56 <sup>5</sup>Department of Cardiovascular Medicine, Juntendo University Shizuoka Hospital, Izunokuni,  
57  
58 Japan; <sup>6</sup>Cardiovascular Center, The Tazuke Kofukai Medical Research Institute, Kitano  
59  
60

1 Hospital, Osaka, Japan; <sup>7</sup>Department of Cardiology, Koto Memorial Hospital, Higashiomi,  
2 Japan; <sup>8</sup>Division of Cardiology, Nara Hospital, Kinki University Faculty of Medicine, Ikoma,  
3 Japan; <sup>9</sup>Department of Cardiovascular Medicine, Kobe City Medical Center General  
4 Hospital, Kobe, Japan; <sup>10</sup>Department of Cardiovascular Medicine, Kansai Denryoku Hospital,  
5 Osaka, Japan; <sup>11</sup>Department of Cardiovascular Medicine, Osaka Red Cross Hospital, Osaka,  
6 Japan; <sup>12</sup>Department of Cardiology, Shizuoka City Shizuoka Hospital, Shizuoka, Japan,  
7 <sup>13</sup>Department of Cardiovascular Medicine, Hamamatsu Rosai Hospital, Hamamatsu, Japan;  
8 <sup>14</sup>Department of Cardiovascular Medicine, Shiga University of Medical Science Hospital,  
9 Otsu, Japan; <sup>15</sup>Department of Cardiology, Japanese Red Cross Wakayama Medical Center,  
10 Wakayama, Japan; <sup>16</sup>Department of Cardiology, Mitsubishi Kyoto Hospital, Kyoto, Japan;  
11 <sup>17</sup>Department of Cardiology, Shizuoka General Hospital, Shizuoka, Japan; <sup>18</sup>Division of  
12 Cardiovascular surgery, Kokura Memorial Hospital, Kitakyushu, Japan; <sup>19</sup>Department of  
13 Cardiology and <sup>20</sup>Cardiovascular Surgery, Kurashiki Central Hospital, Kurashiki, Japan;  
14 <sup>21</sup>Department of Cardiovascular Surgery, Graduate School of Medicine, Kyoto University,  
15 Kyoto, Japan

16  
17 **Correspondence author:** Takeshi Kimura, MD, PhD

18 Department of Cardiovascular Medicine, Kyoto University Graduate School of Medicine,  
19 Kyoto, Japan

20 Address: 54 Shogoin-Kawahara-cho, Sakyo-ku, Kyoto 606-8507 Japan

21 Email: [taketaka@kuhp.kyoto-u.ac.jp](mailto:taketaka@kuhp.kyoto-u.ac.jp)

22 TEL: +81-75-751-4255; FAX: +81-75-751-3299

23

24 **Total word count of the manuscript:** 3193

## 1 **Abstract**

2 **Objectives:** To evaluate changes in demographics, clinical practices, and long-term clinical  
3 outcomes of STEMI patients between before and beyond 2010.

4 **Design:** Multicenter retrospective study

5 **Setting:** The Coronary REvascularization Demonstrating Outcome Study in Kyoto (CREDO-  
6 Kyoto) AMI Registries Wave-1 (2005-2007, 26 centers) and Wave-2 (2011-2013, 22  
7 centers).

8 **Participants:** 9001 patients with STEMI who underwent coronary revascularization (Wave-  
9 1: 4278 patients; Wave-2: 4723 patients).

10 **Primary and secondary outcome measures:** The primary outcome was all-cause death. The  
11 secondary outcomes were cardiovascular death, cardiac death, sudden cardiac death, non-  
12 cardiovascular death, non-cardiac death, myocardial infarction, definite stent thrombosis,  
13 stroke, hospitalization for heart failure, major bleeding, target vessel revascularization,  
14 ischemia-driven target vessel revascularization, any coronary revascularization, ischemia-  
15 driven any coronary revascularization.

16 **Results:** Patients in Wave-2 were older, more often had comorbidities, and more often  
17 presented with cardiogenic shock than those in Wave-1. Patients in Wave-2 had shorter  
18 onset-to-balloon time, and door-to-balloon time, were more frequently used drug-eluting  
19 stents, and received guideline-directed medication than those in Wave-1. The cumulative 3-  
20 year incidence of all-cause death was not significantly different between Wave-1 and Wave-2  
21 (15.5% and 15.7%,  $P=0.77$ ). The adjusted risk for all-cause death in Wave-2 relative to  
22 Wave-1 was not significant at 3 years (HR: 0.92, 95%CI: 0.83-1.03,  $P=0.14$ ), but lower  
23 beyond 30 days (HR: 0.86, 95%CI: 0.75–0.98,  $P=0.03$ ). The adjusted risks of Wave-2  
24 relative to Wave-1 were significantly lower for definite stent thrombosis (HR 0.59, 95%CI:

1 0.43-0.81, P=0.001), and for any coronary revascularization (HR 0.75, 95%CI: 0.69-0.81,  
2 P<0.001), but higher for major bleeding (HR 1.34, 95%CI: 1.20-1.51, P=0.005).

3 **Conclusions:** We could not demonstrate improvement in 3-year mortality risk from Wave-1  
4 to Wave-2, but we found reduction in mortality risk beyond 30 days. We also found reduction  
5 in the risks for definite stent thrombosis and any coronary revascularization, but increase in  
6 the risk for major bleeding from Wave-1 to Wave-2.

For peer review only



## 1 **Strengths and limitations of this study**

- 2 • The present study is the first study evaluating changes of demographics, clinical practices,  
3 and long-term clinical outcomes in STEMI patients enrolled beyond 2010 (Wave-2)  
4 compared with those enrolled before 2010 (Wave-1).
- 5 • The 3-year adjusted risks of patients in Wave-2 relative to those in Wave-1 were not  
6 significantly different for all-cause death, myocardial infarction, and stroke, and significantly  
7 lower for definite stent thrombosis and any coronary revascularization, but higher for major  
8 bleeding
- 9 • The 3-year adjusted risks of patients in Wave-2 relative to those in Wave-1 was lower for  
10 all-cause death beyond 30 days.
- 11 • This study was a historical comparison should result in systematic differences in selection  
12 of patients and acquisition of outcomes

## 1 Introduction

2 The early mortality of patients with ST-segment-elevation myocardial infarction  
3 (STEMI) has been steadily declining over the last several decades.<sup>1-5</sup> This trend appeared to  
4 have been driven by many factors, including demographic change, better pharmacologic  
5 management, widespread penetration of thrombolysis and/or primary percutaneous coronary  
6 intervention (PCI), shorter door-to-balloon time, and improvement in secondary prevention.<sup>4</sup>  
7<sup>6-10</sup> Several large studies had demonstrated improvement of early mortality for patients with  
8 STEMI from 1990s to 2000s.<sup>1-3, 10</sup> Treatment based on the updated guidelines might have  
9 further improved the clinical outcomes of STEMI patients beyond 2000s.<sup>11, 12</sup> However there  
10 could be a gap between guideline and real-world clinical practice. It is currently unknown  
11 whether the changes in the guidelines have contributed to change real-world clinical practice  
12 and to improve clinical outcomes; in particular, there is a scarcity of data evaluating the long-  
13 term clinical outcomes in STEMI patients enrolled beyond 2010 compared with those  
14 enrolled before 2010.<sup>10, 13-15</sup> Therefore, we sought to evaluate changes in demographics,  
15 clinical practices, and long-term clinical outcomes of STEMI patients using data from the 2  
16 large Japanese cohorts of patients with acute myocardial infarction (AMI) enrolled in 2005-  
17 2007 and 2011-2013.

## 18 Methods

### 19 Study Population

20 The Coronary REvascularization Demonstrating Outcome Study in Kyoto  
21 (CREDO-Kyoto) AMI Registries Wave-1 and Wave-2 are a series of physician-initiated,  
22 non-company sponsored, multi-center registry enrolling consecutive patients with AMI who  
23 underwent coronary revascularization, either PCI or isolated coronary artery bypass grafting  
24 (CABG), within seven days of the onset of symptoms. Wave-1 enrolled patients between  
25 January 2005 and December 2007 among 26 centers (both PCI and CABG available: 20  
26

1  
2  
3 1 centers, and only PCI available: 6 centers) in Japan after the introduction of drug-eluting  
4  
5 2 stents (DES) in 2004 (supplementary appendix A).<sup>16</sup> Wave-2 enrolled patients between  
6  
7 3 January 2011 and December 2013 among 22 centers (both PCI and CABG available: 16  
8  
9 4 centers, and only PCI available: 6 centers) in Japan after approval of the new-generation DES  
10  
11 5 in 2010 (supplementary appendix A). We made a historical comparison on demographics,  
12  
13 6 clinical practices, and long-term clinical outcomes of STEMI patients between Wave-1 and  
14  
15 7 Wave-2.  
16  
17  
18

19 8 We enrolled a total of 11899 consecutive AMI patients who had undergone  
20  
21 9 coronary revascularization with PCI or isolated CABG from Wave-1 (N=5429) and Wave-2  
22  
23 10 (N=6470). In the present study, we excluded patients with refusal for study participation  
24  
25 11 (Wave-1: N=9, and Wave-2: N=21), and non-ST-segment elevation myocardial infarction  
26  
27 12 (NSTEMI) (Wave-1: N=875, and Wave-2: N=1720). To make Wave-1 and Wave-2  
28  
29 13 comparable, we further excluded 267 patients in Wave-1 who were enrolled from 4  
30  
31 14 cardiology divisions and 5 cardiovascular surgery divisions not participating in Wave-2 and 6  
32  
33 15 patients in Wave-2 who were enrolled from 1 cardiovascular surgery division not  
34  
35 16 participating in Wave-1. Finally, we retrieved 9001 patients with STEMI for the current study  
36  
37 17 (Wave-1: 4278 patients and Wave-2: 4723 patients) from 22 centers (both PCI and CABG  
38  
39 18 available: 15 centers, and only PCI available: 7 centers) (Figure 1).  
40  
41  
42  
43  
44

45 19 The relevant institutional review boards at all participating hospitals approved the  
46  
47 20 study protocols, and we performed the study in accordance with the Declaration of Helsinki.  
48  
49 21 Written informed consent for both registries were waived because of the retrospective nature  
50  
51 22 of the study; however, we excluded those patients who refused participation in the study  
52  
53 23 when contacted at follow-up. This strategy is concordant with the guidelines of the Japanese  
54  
55 24 Ministry of Health, Labor and Welfare.  
56  
57  
58  
59  
60

## 1 **Definitions and Clinical Outcome Measures**

2 Experienced clinical research coordinators from the independent clinical research  
3 organization (Research Institute for Production Development, Kyoto, Japan; Supplementary  
4 Appendix B) collected baseline clinical, angiographic and procedural characteristics from the  
5 hospital charts or hospital databases according to the pre-specified definitions that were  
6 identical in Wave-1 and Wave-2.

7 Diabetes was defined as treatment with oral hypoglycemic agents or insulin, prior  
8 clinical diagnosis of diabetes, glycated hemoglobin level  $\geq 6.5\%$ , or non-fasting blood  
9 glucose level  $\geq 200$  mg/dL. Left ventricular ejection fraction was measured either by contrast  
10 left ventriculography or echocardiography. Prior stroke was defined as ischemic or  
11 hemorrhagic stroke with neurological symptoms lasting  $>24$  hours. Peripheral vascular  
12 disease was regarded as present when carotid, aortic, or other peripheral vascular diseases  
13 were being treated or scheduled for surgical or endovascular interventions. Renal function  
14 was expressed as estimated glomerular filtration rate (eGFR) calculated by the Modification  
15 of Diet in Renal Disease formula modified for Japanese patients.<sup>17</sup> High-intensity statins  
16 therapy in this study was defined as the statin doses greater than or equal to atorvastatin 20  
17 mg, pitavastatin 4 mg, or rosuvastatin 10 mg.

18 The primary outcome measure of this study was all-cause death. The secondary  
19 outcome measures included cardiovascular death, cardiac death, sudden cardiac death, non-  
20 cardiovascular death, non-cardiac death, myocardial infarction, definite stent thrombosis,  
21 stroke, hospitalization for heart failure, major bleeding, target vessel revascularization (TVR),  
22 ischemia-driven target vessel revascularization, any coronary revascularization, ischemia-  
23 driven any coronary revascularization. Death was regarded as cardiac in origin unless  
24 obvious non-cardiac causes could be identified. Cardiovascular death included cardiac death,  
25 and other vascular death related to stroke, renal disease, and vascular disease. Any death

1 during the index hospitalization and death of unknown cause were regarded as cardiac death.  
2  
3 Sudden death was defined as unexplained death in previously stable patients. Myocardial  
4  
5 infarction was defined according to the definition in the Arterial Revascularization Therapy  
6  
7 Study (ARTS) <sup>18</sup>, and only Q-wave myocardial infarction was regarded as myocardial  
8  
9 infarction when it occurred within 7 days of the index procedure. <sup>19</sup> Definite stent thrombosis  
10  
11 was defined according to the Academic Research Consortium (ARC) definition. <sup>20</sup> Stroke  
12  
13 during follow up was defined as ischemic or hemorrhagic stroke requiring hospitalization  
14  
15 with symptoms lasting >24 hours. Hospitalization for heart failure was defined as  
16  
17 hospitalization due to worsening heart failure requiring intravenous drug therapy. Major  
18  
19 bleeding was defined as the global utilization of streptokinase and tissue plasminogen  
20  
21 activator for occluded coronary arteries (GUSTO) moderate/severe bleeding. <sup>19, 21</sup> TVR was  
22  
23 defined as either PCI or CABG related to the original target vessel. Any coronary  
24  
25 revascularization was defined as either PCI or CABG for any reason. Scheduled staged  
26  
27 coronary revascularization procedures performed within 3 months of the initial procedure  
28  
29 were not regarded as follow-up events, but included in the index procedure. Duration of dual  
30  
31 antiplatelet therapy (DAPT) was left to the discretion of each attending physician. Persistent  
32  
33 discontinuation of DAPT was defined as withdrawal of either thienopyridines or aspirin for at  
34  
35 least 2 months.  
36  
37  
38  
39  
40  
41  
42  
43  
44  
45  
46

## 47 **Data Collection and Follow-up**

48  
49 Collection of follow-up information was mainly conducted through review of the  
50  
51 hospital charts by the clinical research coordinators, and additional follow-up information  
52  
53 was collected through contact with patients, relatives and/or referring physicians by sending  
54  
55 mail with questions regarding vital status, subsequent hospitalizations, and status of  
56  
57 antiplatelet therapy.  
58  
59  
60

1 Follow-up was censored at 3 years after the index procedure to ensure >90% of  
2 clinical follow-up rate in both Wave-1 and Wave-2. Complete 3-year follow-up information  
3 was obtained for 96.2% of patients in Wave-1, and 93.2% of patients in Wave-2,  
4 respectively. The clinical event committee adjudicated those endpoint events including death,  
5 myocardial infarction, stroke and major bleeding (Supplementary Appendix C).

## 7 **Statistical Analysis**

8 Continuous variables were expressed as mean  $\pm$  standard deviation (SD) or median  
9 with interquartile range (IQR). Continuous variables were compared using the Student's t-test  
10 or Wilcoxon rank sum test based on their distributions. Categorical variables are expressed as  
11 frequencies and percentages and were compared using  $\chi^2$  test. Cumulative incidence was  
12 estimated by the Kaplan-Meier method and differences were assessed with the log-rank test.  
13 To estimate the adjusted hazard ratio (HR) and their 95% confidence intervals (CI) of  
14 Wave-2 compared to Wave-1, we used multivariable Cox proportional hazard models by  
15 incorporating the 17 clinically relevant factors listed in Table 1. The risk-adjusting variables  
16 included demographic factors, but not included the factors related to management during the  
17 index hospitalization, because differences in management converged into the changes  
18 between Wave-1 and Wave 2. Continuous risk-adjusting variables were dichotomized  
19 according to the clinically meaningful reference values to make proportional hazard  
20 assumptions robust and to be consistent with previous reports.<sup>22</sup> Proportional hazard  
21 assumptions for the risk-adjusting variables were assessed on the plots of log (time) versus  
22 log [-log (survival)] stratified by the variable, and the assumptions were verified to be  
23 acceptable for all variables. The missing values for the risk-adjusting variables were imputed  
24 as "normal" in the binary classification, because data should have been available if  
25 abnormalities were suspected. We performed subgroup analysis for major bleeding stratified

1  
2  
3 1 by the Academic Research Consortium High Bleeding Risk (ARC-HBR) criteria.<sup>23</sup> We  
4  
5 2 conducted a landmark analysis for all-cause death within and beyond 30 days after the index  
6  
7 3 procedure to distinguish early death related to the index STEMI event from late death during  
8  
9 4 long-term follow-up. We also conducted a landmark analysis for major bleeding within and  
10  
11 5 beyond 30 days to distinguish periprocedural bleeding from non-periprocedural bleeding.  
12  
13

14 6 All analyses were performed using R version 3.6.1 (R Foundation for Statistical  
15  
16 7 Computing, Vienna, Austria). All reported P values were two-tailed, and P values less than  
17  
18 8 0.05 were considered statistically significant.  
19  
20  
21 9

## 22 23 24 10 **Patient and public involvement**

25  
26 11 In this study, patients were not involved in the design, or conduct, or reporting, or  
27  
28 12 dissemination plans of our research  
29  
30  
31 13

## 32 33 14 **Results**

### 34 35 15 **Clinical and Procedural Characteristics**

36  
37 16 Patients in Wave-2 were older and were more often living alone than those in  
38  
39 17 Wave-1. Patients in Wave-2 more often had diabetes, end-stage renal failure, prior stroke,  
40  
41 18 peripheral vascular disease, prior PCI, and malignancy, and less often had ejection fraction  
42  
43 19  $\leq 40\%$ , and current smoking than those in Wave-1 (Table 1).  
44  
45

46  
47 20 Regarding presentation, Wave-2 as compared with Wave-1 included more patients  
48  
49 21 who directly admitted to the participating centers without inter-facility transfer, and who  
50  
51 22 presented with cardiogenic shock and/or Killip class III/IV. Regarding angiographic  
52  
53 23 characteristics, the prevalence of left anterior descending artery culprit was not different  
54  
55 24 between Wave-1 and Wave-2. Patients in Wave-2 more often had multivessel disease than  
56  
57 25 those in Wave-1 (Table 1).  
58  
59  
60

1  
2  
3 1 Regarding procedural characteristics, onset-to-balloon time and door-to-balloon  
4  
5 2 time were significantly shorter in Wave-2 than in Wave-1. Prevalence of transradial approach  
6  
7 3 increased significantly, but only slightly, from Wave-1 to Wave-2. Prevalence of DES use  
8  
9 4 was much higher in Wave-2 than in Wave-1, with new-generation DES use in the vast  
10  
11 5 majority of DES cases in Wave-2 (Table 1). Intra-aortic balloon pumping was more often  
12  
13 6 used in Wave-2 than in in Wave-1 (Table 1).  
14

15  
16  
17 7 In terms of baseline medications, patients in Wave-2 more often took  
18  
19 8 thienopyridine, statins, beta-blockers, angiotensin-converting enzyme inhibitors/angiotensin  
20  
21 9 receptor blockers, and proton pump inhibitors than those in Wave-1, while patients in Wave-  
22  
23 10 2 less often took cilostazol than those in Wave-1. The prevalence of high-intensity statins  
24  
25 11 therapy was very low in both Wave-1 and Wave-2. Regarding the kind of thienopyridine, the  
26  
27 12 vast majority of patients in Wave-1 took ticlopidine, while the vast majority of patients in  
28  
29 13 Wave-2 took clopidogrel (Table 1).  
30  
31  
32

### 33 34 35 15 **Clinical Outcomes**

36  
37 16 The cumulative 3-year incidence of all-cause death was not significantly different  
38  
39 17 between Wave-1 and Wave-2 (15.5% versus 15.7%, log-rank  $P=0.77$ ) (Table 2, and Figure  
40  
41 18 2A). The adjusted risk of Wave-1 relative to Wave-2 remained insignificant for all-cause  
42  
43 19 death (HR: 0.92, 95%CI: 0.83–1.03,  $P=0.14$ ) (Table 2). In the 30-day landmark analysis,  
44  
45 20 cumulative incidence of all-cause death was not significantly different between Wave-1 and  
46  
47 21 Wave-2 both within 30 days (5.5% versus 5.9%, log-rank  $P=0.37$ ), and beyond 30 days  
48  
49 22 (10.6% versus 10.4%, log-rank  $P=0.74$ ). However, after adjusting confounders, the lower  
50  
51 23 mortality risk of Wave-2 relative to Wave-1 was significant beyond 30 days after index  
52  
53 24 procedure (HR: 0.86, 95%CI: 0.75–0.98,  $P=0.03$ ), although it was not significant within 30  
54  
55 25 days (HR: 1.04, 95%CI: 0.87–1.23,  $P=0.69$ ) (Figure I in the online-only Data Supplement).  
56  
57  
58  
59  
60



1  
2  
3 1 The results of the 30-day landmark analysis were consistent in patients with and without  
4  
5 2 cardiogenic shock (Figure I in the online-only Data Supplement).

6  
7 3 The lower crude and adjusted risks of Wave-2 relative to Wave-1 were significant  
8  
9 4 for definite stent thrombosis, target vessel revascularization, and any coronary  
10  
11 5 revascularization, while those were insignificant for cardiovascular death, myocardial  
12  
13 6 infarction, and stroke (Table 2, and Figure 3).

14  
15 7 Meanwhile, the cumulative 3-year incidence of major bleeding was significantly  
16  
17 8 higher in Wave-2 than in Wave-1 (16.5% and 12.0%, log-rank  $P < 0.001$ ) (Table 2, and Figure  
18  
19 9 3). The excess adjusted risk of Wave-2 relative to Wave-1 remained significant for major  
20  
21 10 bleeding (HR: 1.34, 95%CI: 1.20–1.51,  $P = 0.005$ ) (Table 2). In the 30-day landmark analysis,  
22  
23 11 the excess crude and adjusted risks of Wave-2 relative to Wave-1 for major bleeding were  
24  
25 12 significant both within 30 days and beyond 30 days (Figure II in the online-only Data  
26  
27 13 Supplement). In the subgroup analysis, the higher risk of Wave-2 relative to Wave-1 for  
28  
29 14 major bleeding was consistent in patients with and without ARC-HBR (Figure III in the  
30  
31 15 online-only Data Supplement). The cumulative incidence of persistent DAPT discontinuation  
32  
33 16 was significantly lower in Wave-2 than in Wave-1, indicating significantly longer DAPT  
34  
35 17 duration in Wave-2 than in Wave-1 (Figure IV in the online-only Data Supplement).

## 36 37 38 39 40 41 42 43 44 19 **Discussion**

45  
46 20 The main findings of this study were as follows; 1) Regarding demographics,  
47  
48 21 STEMI patients in Wave-2 were older, more often had comorbidities, and more often  
49  
50 22 presented with serious hemodynamic conditions than those in Wave-1; 2) Regarding clinical  
51  
52 23 practice, patients in Wave-2 had shorter onset-to-balloon time and door-to-balloon time, were  
53  
54 24 more frequently treated with DES, and more often received guideline-directed medical  
55  
56 25 therapy at baseline, and longer duration of DAPT during follow-up than those in Wave-1; 3)  
57  
58  
59  
60

1 The 3-year adjusted risks of patients in Wave-2 relative to those in Wave-1 were not  
2 significantly different for all-cause death, myocardial infarction, and stroke, and significantly  
3 lower for definite stent thrombosis and any coronary revascularization, but significantly  
4 higher for major bleeding; 4) We witnessed a lower adjusted mortality risk of Wave-2  
5 relative to Wave-1 beyond 30 days, but not within 30 days.

6 This was the first study to evaluate demographics, clinical practices, and long-term  
7 clinical outcomes in STEMI patients enrolled beyond 2010 compared with those enrolled  
8 before 2010. In the present study, we could not demonstrate significant improvement in  
9 mortality risk from Wave-1 to Wave-2. The mortality rates at 30 days were still around 5-6%  
10 in both Wave-1 and Wave-2, which was in line with the previous studies.<sup>5, 24</sup> It was true that  
11 patients in Wave-2 were older and sicker than those in Wave-1. However, even the adjusted  
12 analysis did not suggest improvement in 30-day mortality risk from Wave-1 to Wave-2. We  
13 did observe significantly shorter onset-to-balloon time and door-to-balloon time with less  
14 frequent inter-facility transfer, and more frequent use of DES in Wave-2 than in Wave-1.  
15 However, these changes in clinical practice did not lead to improvement in 30-day mortality  
16 rate. Further shortening of onset-to-balloon time, more widespread use of transradial  
17 approach, and improved management of cardiogenic shock might be important to improve  
18 30-day mortality rate.<sup>16, 25-32</sup>

19 On the other hands, beyond 30 days after the index procedure, we found a  
20 significantly lower adjusted mortality risk of patients in Wave-2 relative to those in Wave-1.  
21 The changes in clinical practices that might have contributed to lower mortality risk in Wave-  
22 2 relative to Wave-1 included shorter onset-to-balloon time, introduction of new-generation  
23 DES, and higher prevalence of guideline-directed medications use, particularly statins.  
24 Indeed, in the present study, the rates of definite stent thrombosis and any coronary  
25 revascularization were significantly lower in Wave-2 than in Wave-1, which was in line with

1 the previous studies comparing new-generation DES with first-generation DES.<sup>33</sup> Moreover,  
2 we did find substantial increase in the prevalence of statins use. Nevertheless, the prescription  
3 rate of high-intensity statins therapy was extremely low in both Wave-1 and Wave-2. The  
4 efficacy of high-intensity statins therapy has been firmly established in preventing  
5 cardiovascular events in patients with coronary artery disease.<sup>34 35</sup> We should make every  
6 effort to promote wider penetration of high-intensity statins therapy in Japan.

7         Meanwhile, we have demonstrated that the cumulative 3-year incidence of major  
8 bleeding was significantly higher in Wave-2 than in Wave-1. Patients in Wave-2 were older  
9 and sicker than those in Wave-1. However, even after adjusting confounders, the excess risk  
10 of Wave-2 relative to Wave-1 remained significant for major bleeding. Moreover, the excess  
11 bleeding risk of Wave-2 relative to Wave-1 was significant regardless of ARC-HBR.  
12 Furthermore, the excess bleeding risk of Wave-2 relative to Wave-1 was significant both  
13 within 30 days and beyond 30 days. One of the reasons for the higher bleeding risk within 30  
14 days in Wave-2 than in Wave-1 might be the different types of thienopyridine used in Wave-  
15 1 and Wave-2. In Wave-1, the vast majority of patients took ticlopidine 100 mg twice daily as  
16 the standard dose in Japan, which was much lower than the dose used globally (250 mg twice  
17 daily), while in Wave-2, the vast majority of patients took clopidogrel 75 mg once daily,  
18 which was the the dose used globally. The 30-day rate of major bleeding in Wave-2 was  
19 substantial (Entire cohort: 9.8%, ARC-HBR: 14.8%, and non-ARC-HBR: 5.4%), warranting  
20 to explore the optimal antiplatelet regimen in STEMI patients minimizing bleeding events  
21 while maintaining efficacy in preventing thrombotic events. For the higher bleeding risk  
22 beyond 30 days in Wave-2 than in Wave-1, one of the reasons in addition to the difference in  
23 the types of thienopyridine might be the longer DAPT duration in Wave-2 than in Wave-1.  
24 Recent studies have suggested clinical benefit with very short DAPT after PCI in reducing  
25 major bleeding without increase in cardiovascular events, although STEMI patients

1 constituted only a small proportion in the STOPDAPT-2 (Short and Optimal duration of  
2 Dual AntiPlatelet Therapy after everolimus-eluting cobalt-chromium stent-2) trial, and were  
3 excluded in the TWILIGHT (Ticagrelor with Aspirin or Alone in High-Risk Patients after  
4 Coronary Intervention) trial.<sup>36 37</sup> We should continue to pursue the optimal DAPT duration  
5 and optimal maintenance antithrombotic regimen in STEMI patients.

## 6 **Limitations**

7           There are several limitations of this study. First, historical comparison should result  
8 in systematic differences in selection of patients and acquisition of outcomes, although we  
9 were careful in using data only from those centers that participated in both Wave-1 and  
10 Wave-2, standardizing the follow-up duration at 3 years, and adopting the identical  
11 methodology for baseline and follow-up data collection, and definitions of baseline  
12 characteristics and clinical outcome measures in Wave-1 and Wave-2. It is noteworthy that  
13 cumulative incidence of myocardial infarction was numerically higher in Wave-2 than in  
14 Wave-1, despite significantly lower incidence of definite stent thrombosis in Wave-2 than in  
15 Wave-1. We could not deny the possibility of ascertainment bias for myocardial infarction,  
16 although we adopted the identical definition of myocardial infarction in Wave-1 and Wave-2.  
17 The less widespread use of troponin for the diagnosis of myocardial infarction in Wave-1  
18 compared with Wave-2 might have underestimated the incidence of myocardial infarction in  
19 Wave-1, as reflected by the fact that there were much larger number of patients with  
20 NSTEMI in Wave-2 than in Wave-1. Moreover, we could not deny the possibility of  
21 ascertainment bias for major bleeding, although we adopted the identical definition in Wave-  
22 1 and Wave-2. It could be possible that more major bleeding events were recorded in the  
23 hospital charts due to the growing interest in bleeding events in later time period. Second,  
24 there might be some residual unmeasured confounders, although we made extensive risk  
25 adjustment.

1

2 **Conclusions**

3 We could not demonstrate significant improvement in 3-year mortality risk from Wave-1 to  
4 Wave-2, but we found significant reduction in mortality risk beyond 30 days. There were  
5 significant reduction in the risks for definite stent thrombosis and any coronary  
6 revascularization, but significant increase in the risk for major bleeding from Wave-1 to  
7 Wave-2.

For peer review only

## 1 **References**

- 2 1. Fox KA, Steg PG, Eagle KA, et al. Decline in rates of death and heart failure in  
3 acute coronary syndromes, 1999-2006. *JAMA*. 2007;297:1892-900.
- 4 2. Rogers WJ, Frederick PD, Stoehr E, et al. Trends in presenting characteristics and  
5 hospital mortality among patients with ST elevation and non-ST elevation myocardial  
6 infarction in the National Registry of Myocardial Infarction from 1990 to 2006. *Am Heart J*.  
7 2008;156:1026-34.
- 8 3. Rosamond WD, Chambless LE, Heiss G, et al. Twenty-two-year trends in  
9 incidence of myocardial infarction, coronary heart disease mortality, and case fatality in 4 US  
10 communities, 1987-2008. *Circulation*. 2012;125:1848-57.
- 11 4. Yeh RW, Sidney S, Chandra M, et al. Population trends in the incidence and  
12 outcomes of acute myocardial infarction. *N Engl J Med*. 2010;362:2155-65.
- 13 5. Puymirat E, Simon T, Steg PG, et al. Association of changes in clinical  
14 characteristics and management with improvement in survival among patients with ST-  
15 elevation myocardial infarction. *JAMA*. 2012;308:998-1006.
- 16 6. Stolt Steiger V, Goy JJ, Stauffer JC, et al. Significant decrease in in-hospital  
17 mortality and major adverse cardiac events in Swiss STEMI patients between 2000 and  
18 December 2007. *Swiss Med Wkly*. 2009;139:453-7.
- 19 7. Puymirat E, Schiele F, Steg PG, et al. Determinants of improved one-year survival  
20 in non-ST-segment elevation myocardial infarction patients: insights from the French FAST-  
21 MI program over 15 years. *Int J Cardiol*. 2014;177:281-6.
- 22 8. Jernberg T, Johanson P, Held C, et al. Association between adoption of evidence-  
23 based treatment and survival for patients with ST-elevation myocardial infarction. *JAMA*.  
24 2011;305:1677-84.

- 1  
2  
3 1 9. Gale CP, Allan V, Cattle BA, et al. Trends in hospital treatments, including  
4  
5 2 revascularisation, following acute myocardial infarction, 2003-2010: a multilevel and relative  
6  
7 3 survival analysis for the National Institute for Cardiovascular Outcomes Research (NICOR).  
8  
9 4 *Heart*. 2014;100:582-9.
- 10 5 10. Puymirat E, Simon T, Cayla G, et al. Acute Myocardial Infarction: Changes in  
11  
12 6 Patient Characteristics, Management, and 6-Month Outcomes Over a Period of 20 Years in  
13  
14 7 the FAST-MI Program (French Registry of Acute ST-Elevation or Non-ST-Elevation  
15  
16 8 Myocardial Infarction) 1995 to 2015. *Circulation*. 2017;136:1908-1919.
- 17 9 11. O'Gara PT, Kushner FG, Ascheim DD, et al. 2013 ACCF/AHA guideline for the  
18  
19 10 management of ST-elevation myocardial infarction: executive summary: a report of the  
20  
21 11 American College of Cardiology Foundation/American Heart Association Task Force on  
22  
23 12 Practice Guidelines. *J Am Coll Cardiol*. 2013;61:485-510.
- 24 13 12. Ibanez B, James S, Agewall S, et al. 2017 ESC Guidelines for the management of  
25  
26 14 acute myocardial infarction in patients presenting with ST-segment elevation: The Task  
27  
28 15 Force for the management of acute myocardial infarction in patients presenting with ST-  
29  
30 16 segment elevation of the European Society of Cardiology (ESC). *Eur Heart J*. 2018;39:119-  
31  
32 17 177.
- 33 18 13. Eagle KA, Goodman SG, Avezum A, et al. Practice variation and missed  
34  
35 19 opportunities for reperfusion in ST-segment-elevation myocardial infarction: findings from  
36  
37 20 the Global Registry of Acute Coronary Events (GRACE). *Lancet*. 2002;359:373-7.
- 38 21 14. Fox KA, Goodman SG, Anderson FA, et al. From guidelines to clinical practice:  
39  
40 22 the impact of hospital and geographical characteristics on temporal trends in the management  
41  
42 23 of acute coronary syndromes. The Global Registry of Acute Coronary Events (GRACE). *Eur*  
43  
44 24 *Heart J*. 2003;24:1414-24.

- 1  
2  
3 1 15. Carruthers KF, Dabbous OH, Flather MD, et al. Contemporary management of  
4  
5 2 acute coronary syndromes: does the practice match the evidence? The global registry of acute  
6  
7 3 coronary events (GRACE). *Heart*. 2005;91:290-8.
- 8  
9  
10 4 16. Shiomi H, Nakagawa Y, Morimoto T, et al. Association of onset to balloon and  
11  
12 5 door to balloon time with long term clinical outcome in patients with ST elevation acute  
13  
14 6 myocardial infarction having primary percutaneous coronary intervention: observational  
15  
16 7 study. *BMJ*. 2012;344:e3257.
- 17  
18  
19 8 17. Matsuo S, Imai E, Horio M, et al. Revised equations for estimated GFR from serum  
20  
21 9 creatinine in Japan. *Am J Kidney Dis*. 2009;53:982-92.
- 22  
23  
24 10 18. Serruys PW, Unger F, Sousa JE, et al. Comparison of coronary-artery bypass  
25  
26 11 surgery and stenting for the treatment of multivessel disease. *N Engl J Med*. 2001;344:1117-  
27  
28 12 24.
- 29  
30  
31 13 19. Kimura T, Morimoto T, Furukawa Y, et al. Long-term safety and efficacy of  
32  
33 14 sirolimus-eluting stents versus bare-metal stents in real world clinical practice in Japan.  
34  
35 15 *Cardiovasc Interv Ther*. 2011;26:234-45.
- 36  
37  
38 16 20. Cutlip DE, Windecker S, Mehran R, et al. Clinical end points in coronary stent  
39  
40 17 trials: a case for standardized definitions. *Circulation*. 2007;115:2344-51.
- 41  
42  
43 18 21. An international randomized trial comparing four thrombolytic strategies for acute  
44  
45 19 myocardial infarction. *N Engl J Med*. 1993;329:673-82.
- 46  
47 20 22. Kimura T, Morimoto T, Furukawa Y, et al. Long-term outcomes of coronary-artery  
48  
49 21 bypass graft surgery versus percutaneous coronary intervention for multivessel coronary  
50  
51 22 artery disease in the bare-metal stent era. *Circulation*. 2008;118:S199-209.
- 52  
53  
54 23 23. Urban P, Mehran R, Collieran R, et al. Defining High Bleeding Risk in Patients  
55  
56 24 Undergoing Percutaneous Coronary Intervention. *Circulation*. 2019;140:240-261.
- 57  
58  
59  
60



- 1  
2  
3 1 24. Li J, Li X, Wang Q, et al. ST-segment elevation myocardial infarction in China  
4  
5 2 from 2001 to 2011 (the China PEACE-Retrospective Acute Myocardial Infarction Study): a  
6  
7 3 retrospective analysis of hospital data. *Lancet*. 2015;385:441-51.  
8  
9  
10 4 25. Cannon CP, Gibson CM, Lambrew CT, et al. Relationship of symptom-onset-to-  
11  
12 5 balloon time and door-to-balloon time with mortality in patients undergoing angioplasty for  
13  
14 6 acute myocardial infarction. *JAMA*. 2000;283:2941-7.  
15  
16  
17 7 26. De Luca G, Suryapranata H, Zijlstra F, et al. Symptom-onset-to-balloon time and  
18  
19 8 mortality in patients with acute myocardial infarction treated by primary angioplasty. *J Am*  
20  
21 9 *Coll Cardiol*. 2003;42:991-7.  
22  
23  
24 10 27. McNamara RL, Wang Y, Herrin J, et al. Effect of door-to-balloon time on mortality  
25  
26 11 in patients with ST-segment elevation myocardial infarction. *J Am Coll Cardiol*.  
27  
28 12 2006;47:2180-6.  
29  
30  
31 13 28. Maeng M, Nielsen PH, Busk M, et al. Time to treatment and three-year mortality  
32  
33 14 after primary percutaneous coronary intervention for ST-segment elevation myocardial  
34  
35 15 infarction-a DANish Trial in Acute Myocardial Infarction-2 (DANAMI-2) substudy. *Am J*  
36  
37 16 *Cardiol*. 2010;105:1528-34.  
38  
39  
40 17 29. Rollando D, Puggioni E, Robotti S, et al. Symptom onset-to-balloon time and  
41  
42 18 mortality in the first seven years after STEMI treated with primary percutaneous coronary  
43  
44 19 intervention. *Heart*. 2012;98:1738-42.  
45  
46  
47 20 30. Park J, Choi KH, Lee JM, et al. Prognostic Implications of Door-to-Balloon Time  
48  
49 21 and Onset-to-Door Time on Mortality in Patients With ST -Segment-Elevation Myocardial  
50  
51 22 Infarction Treated With Primary Percutaneous Coronary Intervention. *J Am Heart Assoc*.  
52  
53 23 2019;8:e012188.  
54  
55  
56  
57  
58  
59  
60

- 1  
2  
3 1 31. Nakatsuma K, Shiomi H, Morimoto T, et al. Inter-Facility Transfer vs. Direct  
4 Admission of Patients With ST-Segment Elevation Acute Myocardial Infarction Undergoing  
5 Primary Percutaneous Coronary Intervention. *Circ J*. 2016;80:1764-72.  
6  
7  
8 2 32. Gandhi S, Kakar R and Overgaard CB. Comparison of radial to femoral PCI in  
9 acute myocardial infarction and cardiogenic shock: a systematic review. *J Thromb*  
10 *Thrombolysis*. 2015;40:108-17.  
11  
12  
13 3 33. Toyota T, Shiomi H, Morimoto T, et al. Meta-analysis of long-term clinical  
14 outcomes of everolimus-eluting stents. *Am J Cardiol*. 2015;116:187-94.  
15  
16  
17 4 34. Taguchi I, Iimuro S, Iwata H, et al. High-Dose Versus Low-Dose Pitavastatin in  
18 Japanese Patients With Stable Coronary Artery Disease (REAL-CAD): A Randomized  
19 Superiority Trial. *Circulation*. 2018;137:1997-2009.  
20  
21  
22 5 35. Baigent C, Blackwell L, Emberson J, et al. Efficacy and safety of more intensive  
23 lowering of LDL cholesterol: a meta-analysis of data from 170,000 participants in 26  
24 randomised trials. *Lancet*. 2010;376:1670-81.  
25  
26  
27 6 36. Watanabe H, Domei T, Morimoto T, et al. Effect of 1-Month Dual Antiplatelet  
28 Therapy Followed by Clopidogrel vs 12-Month Dual Antiplatelet Therapy on Cardiovascular  
29 and Bleeding Events in Patients Receiving PCI: The STOPDAPT-2 Randomized Clinical  
30 Trial. *JAMA*. 2019;321:2414-2427.  
31  
32  
33 7 37. Mehran R, Baber U, Sharma SK, et al. Ticagrelor with or without Aspirin in High-  
34 Risk Patients after PCI. *N Engl J Med*. 2019;381:2032-2042.  
35  
36  
37  
38  
39  
40  
41  
42  
43  
44  
45  
46  
47  
48  
49  
50  
51  
52  
53  
54  
55  
56  
57  
58  
59  
60

1  
2  
3 **1 Footnotes**

4  
5 **2 Acknowledgments:**

6  
7  
8 We appreciate the support and collaboration of the coinvestigators participating in the  
9  
10 CREDO Kyoto PCI/CABG Registry Wave-1 and the CREDO Kyoto PCI/CABG Registry  
11  
12 Wave-2. We are indebted to the outstanding effort of the clinical research coordinators for  
13  
14 data collection.

15  
16  
17 **3 Contributors:**

18  
19 T.Kimura conceptualized the CREDO-Kyoto AMI Registry. YT, prepared the original draft  
20  
21 of the manuscript. H.Shiomi, TM, T.Kimura reviewed and edited the the original draft of the  
22  
23 manuscript. YT, H.Shiomi, Y.Yoshikawa, YMN, K.Yamamoto, K.Yamaji curated data. YT,  
24  
25 TM, T.Kimura constructed methodology for this study. YT, TM performed the statistical  
26  
27 analysis. H.Shiomi, TM, RT, K.Yamaji, JT, Hirotohi Watanabe, SS, MI, TT, MS, NE, KI,  
28  
29 TI, TO, ES, TY, H.Sakamoto, KA, YS, YF, YS, YN, KK, T.Komiya, KM, T.Kimura are  
30  
31 investigators of the CREDO-Kyoto AMI Registry. YT, H.Shiomi, YY, YMN, K.Yamamoto,  
32  
33 ETK, EY, Y.Yamashita, MF, Hiroki Watanabe, HY, KN assessed and validated events within  
34  
35 the CREDO-Kyoto AMI Registry. T.Kimura is the Guarantor.

36  
37  
38  
39 **4 Funding:**

40  
41  
42 This study was supported by an educational grant from the Research Institute for Production  
43  
44 Development (Kyoto, Japan) and the Pharmaceuticals and Medical Devices Agency (PMDA)  
45  
46 in Japan (Tokyo, Japan). Grant numbers were not applicable.

47  
48  
49 **5 Competing interest statement:**

50  
51 All authors have completed the Unified Competing Interest form and declare: Dr. Shiomi  
52  
53 reports personal fees from Abbott Vascular, Boston Scientific, and Daiichi Sankyo. Dr.  
54  
55 Morimoto reports lecturer's fees from Bayer, Daiichi Sankyo, Japan Lifeline, Kyocera,  
56  
57 Mitsubishi Tanabe, Novartis, and Toray; the manuscript fees from Bristol-Myers Squibb and  
58  
59

1 Kowa; served advisory boards for Asahi Kasei, Boston Scientific, Bristol-Myers Squibb, and  
2 Sanofi. Dr. Kato reports grant from Ono Pharmaceutical, and reports personal fees from  
3 Daiichi Sankyo, AstraZeneca, Bristol-Myers Squibb, Tanabe-Mitsubishi Pharma, Ono  
4 Pharmaceutical, MSD KK, Pfizer. Dr. Ehara reports personal fees from Abbott Vascular,  
5 Medtronic, Terumo, Bayer, Boston Scientific, Daiichi-Sankyo, Edwards Lifescience, Pfizer,  
6 Bristol Myers Squibb, Takeda, Boehringer Ingelheim. Dr. Furukawa reports personal fees  
7 from Daiichi Sankyo, Bayer, Sanofi, Kowa, Pfizer, Bristol-Myers Squibb, Otsuka  
8 Pharmaceutical, Sumitomo Dainippon Pharma, Takeda and Ono Pharmaceutical. Dr.  
9 Nakagawa reports grant from Abbott Vascular and Boston Scientific, and reports personal  
10 fees from Abbott Vascular, Bayer, Boston Scientific, Bristol-Myers Squibb, Daiichi Sankyo.  
11 Dr. Kimura reports personal fees from Abbott Vascular, MSD, Eisai, Edwards Lifescience,  
12 Ono Pharmaceutical, Tsumura, Medical Review, Kowa, Sanofi, Daiichi Sankyo, Takeda  
13 Pharmaceutical, Pharmaceuticals and Medical Devices Agency, Abiomed, Bayer, Bristol-  
14 Myers Squibb, Boston Scientific, Lifescience, Toray, Astellas Amgen Biopharma, Astellas,  
15 AstraZeneca, Otsuka Pharmaceutical, OrbusNeich, MSD Life Science Foundation, Public  
16 Health Research Foundation, Chugai Pharmaceutical, Boehringer Ingelheim, Japan Society  
17 for the Promotion of Science, Interscience, Philips, Kowa Pharmaceutical, Mitsubishi Tanabe  
18 Pharma, Terumo, Novartis Pharma, Sumitomo Dainippon Pharma.

19 **Ethical approval:**

20 The protocol for CREDO-Kyoto AMI Registry Wave-1 and Wave-2 were approved by the  
21 human research ethics committees of the Kyoto University Graduate School of Medicine  
22 (E42,E2400).

23 **Provenance and peer review:**

24 Not commissioned; externally peer reviewed.

25 **Data sharing statement:**

1  
2  
3  
4  
5  
6  
7  
8  
9  
10  
11  
12  
13  
14  
15  
16  
17  
18  
19  
20  
21  
22  
23  
24  
25  
26  
27  
28  
29  
30  
31  
32  
33  
34  
35  
36  
37  
38  
39  
40  
41  
42  
43  
44  
45  
46  
47  
48  
49  
50  
51  
52  
53  
54  
55  
56  
57  
58  
59  
60

1 All data relevant to the study are included in the article or uploaded as supplementary  
2 information.  
3

For peer review only

1  
2  
3 **1 Figure legends**  
4

5  
6 **2**

7  
8 **3 Figure 1. Study flowchart**  
9

10 CREDO-Kyoto=Coronary REvascularization Demonstrating Outcome study in Kyoto;

11  
12 AMI=acute myocardial infarction; PCI=percutaneous coronary intervention,  
13

14 CABG=coronary artery bypass grafting; NSTEMI=non-ST-segment elevation myocardial  
15

16  
17 infarction; STEMI=ST-segment elevation myocardial infarction.  
18

19  
20 **8**

21 **9 Figure 2. Kaplan-Meier curves (A) for all-cause death and (B) for cardiovascular death**

22  
23 **10 comparing between Wave-1 and Wave-2**  
24  
25

26  
27 **11**

28 **12 Figure 3. Kaplan-Meier curves comparing between Wave-1 and Wave-2 for (A)**

29  
30 **13 myocardial infarction, (B) definite stent thrombosis, (C) major bleeding, and (D) any**

31  
32 **14 coronary revascularization**  
33

34  
35 Definite stent thrombosis was based on the ARC definition, and was analyzed only for  
36

37  
38 patients who underwent PCI with stent implantation (3739 patients in Wave-1 and 4241  
39

40  
41 patients in Wave-2).  
42

43  
44 Major bleeding was defined as GUSTO moderate/severe bleeding.  
45

46  
47 CREDO-Kyoto==Coronary REvascularization Demonstrating Outcome study in Kyoto;

48  
49 AMI=acute myocardial infarction; STEMI=ST-segment elevation myocardial infarction;

50  
51 NSTEMI=non-ST-segment elevation myocardial infarction; ARC=academic research

52  
53 consortium; GUSTO=global utilization of streptokinase and tissue plasminogen activator for

54  
55 occluded coronary arteries .  
56  
57  
58  
59  
60

1 **Table 1. Baseline characteristics comparing between Wave-1 and Wave-2**

|                                                          | Wave-1<br>(N=4278) | Wave-2<br>(N=4723) | P value |
|----------------------------------------------------------|--------------------|--------------------|---------|
| <b>(A) Clinical characteristics</b>                      |                    |                    |         |
| Age (years)                                              | 67.6 ± 12.2        | 68.8 ± 12.5        | <0.001  |
| Age ≥75 years*                                           | 1336 (31%)         | 1694 (36%)         | <0.001  |
| Men*                                                     | 3156 (74%)         | 3538 (75%)         | 0.23    |
| Body mass index (kg/m <sup>2</sup> )                     | 23.6 ± 3.5         | 23.7 ± 3.6         | 0.40    |
| Body mass index <25.0 kg/m <sup>2</sup> *                | 3058 (72%)         | 3269 (69%)         | 0.02    |
| Hypertension*                                            | 3343 (78%)         | 3768 (80%)         | 0.06    |
| Diabetes mellitus*                                       | 1395 (33%)         | 1664 (35%)         | 0.009   |
| on insulin therapy                                       | 205 (4.8%)         | 270 (5.7%)         | 0.06    |
| Current smoking*                                         | 1730 (40%)         | 1702 (36%)         | <0.001  |
| Heart failure*                                           | 1350 (32%)         | 1566 (33%)         | 0.11    |
| LVEF                                                     | 52.5±12.9          | 53.8±12.4          | <0.001  |
| LVEF ≤40%                                                | 596 (18%)          | 595 (14%)          | <0.001  |
| Prior PCI                                                | 364 (8.5%)         | 523 (11%)          | <0.001  |
| Prior CABG                                               | 53 (1.2%)          | 59 (1.2%)          | 1.00    |
| Prior myocardial infarction*                             | 381 (8.9%)         | 427 (9.0%)         | 0.85    |
| Prior stroke (symptomatic)*                              | 394 (9.2%)         | 521 (11%)          | 0.005   |
| Peripheral vascular disease*                             | 138 (3.2%)         | 209 (4.4%)         | 0.004   |
| eGFR<30mL/min/1.73m <sup>2</sup> , without hemodialysis* | 202 (4.7%)         | 288 (6.1%)         | 0.005   |
| Hemodialysis*                                            | 73 (1.7%)          | 131 (2.8%)         | 0.001   |
| eGFR <30 ml/min/1.73m <sup>2</sup> or hemodialysis       | 275 (6.4%)         | 419 (8.9%)         | <0.001  |
| Atrial fibrillation                                      | 418 (9.8%)         | 419 (8.9%)         | 0.15    |
| Anemia (Hemoglobin <11.0g/dl)*                           | 438 (10%)          | 531 (11%)          | 0.13    |
| Thrombocytopenia (Platelet <100×10 <sup>9</sup> /L)      | 84 (2.0%)          | 102 (2.2%)         | 0.56    |
| Chronic obstructive pulmonary disease                    | 140 (3.3%)         | 173 (3.7%)         | 0.34    |
| Liver cirrhosis                                          | 101 (2.4%)         | 101 (2.1%)         | 0.52    |
| Malignancy*                                              | 337 (7.9%)         | 516 (11%)          | <0.001  |
| <b>(B) Presentation</b>                                  |                    |                    |         |
| Living alone                                             | 509 (13%)          | 780 (17%)          | <0.001  |
| Direct admission                                         | 2215 (54%)         | 2603 (57%)         | 0.02    |
| Inter-facility transfer                                  | 1866 (44%)         | 1983 (42%)         | 0.12    |

|                         |             |             |        |
|-------------------------|-------------|-------------|--------|
| Killip class III/IV     | 725 (17%)   | 915 (19%)   | 0.003  |
| Cardiogenic shock       | 596 (14%)   | 757 (16%)   | 0.005  |
| Cardiopulmonary arrest* | 142 (3.3%)  | 193 (4.1%)  | 0.06   |
| Maximum CK              | 3100 ± 3616 | 2801 ± 4328 | <0.001 |

### (C) Angiographic characteristics

#### Infarct related artery location:

|                                           |            |            |        |
|-------------------------------------------|------------|------------|--------|
| Left anterior descending coronary artery* | 1976 (46%) | 2171 (46%) | 0.79   |
| Left circumflex coronary artery           | 419 (9.8%) | 464 (9.8%) | 1.00   |
| Right coronary artery                     | 1730 (41%) | 1893 (40%) | 0.70   |
| Left main coronary artery                 | 107 (2.5%) | 170 (3.6%) | 0.003  |
| Coronary artery bypass graft              | 19 (0.4%)  | 24 (0.5%)  | 0.78   |
| Multivessel disease                       | 2222 (52%) | 2655 (56%) | <0.001 |

### (D) Procedural characteristics

|                                          |               |               |        |
|------------------------------------------|---------------|---------------|--------|
| Onset-to-balloon time (hours)            | 4.2 (2.8-7.2) | 4.0 (2.7-6.6) | <0.001 |
| Door-to-balloon time (minutes)           | 90 (60-132)   | 79 (59-110)   | <0.001 |
| Intra-aortic balloon pump use            | 738 (17%)     | 994 (21%)     | <0.001 |
| Percutaneous cardiopulmonary support use | 116 (2.7%)    | 149 (3.2%)    | 0.24   |
| PCI*                                     | 4180 (98%)    | 4625 (98%)    | 0.48   |
| Transradial approach                     | 498 (12%)     | 733 (16%)     | <0.001 |
| Transfemoral approach                    | 3432 (82%)    | 3640 (79%)    | <0.001 |
| IVUS use for the culprit lesion          | 1260 (30%)    | 2653 (57%)    | <0.001 |
| Stent use for the culprit lesion         | 3739 (89%)    | 4241 (92%)    | <0.001 |
| Bare metal stent                         | 2946 (79%)    | 1735 (41%)    | <0.001 |
| Drug-eluting stent                       | 793 (21%)     | 2506 (59%)    | <0.001 |
| Staged PCI                               | 932 (22%)     | 1018 (22%)    | 0.77   |
| Stent use including staged PCI           | 3802 (91%)    | 4295 (93%)    | 0.001  |
| Bare metal stent                         | 2542 (67%)    | 1491 (35%)    | <0.001 |
| Drug-eluting stent                       | 1260 (33%)    | 2804 (65%)    | <0.001 |
| First-generation DES use                 | 1257 (99%)    | 47 (1.7%)     | <0.001 |
| Sirolimus-eluting stent (CYPHER™)        | 1174 (93%)    | 27 (57%)      |        |
| Paclitaxel-eluting stent (TAXUS™)        | 115 (9.1%)    | 21 (45%)      |        |
| New-generation DES use                   | -             | 2776 (99%)    |        |
| Everolimus-eluting stent (XIENCE™)       | -             | 2054 (74%)    |        |
| Everolimus-eluting stent (PROMUS™)       | -             | 1616 (58%)    |        |



|    |                                             |            |            |        |
|----|---------------------------------------------|------------|------------|--------|
|    | Biolimus-eluting stent (NOBORI™)            | -          | 725 (26%)  |        |
|    | Zotarolimus-eluting stent (RESOLUTE™)       | -          | 255 (9.2%) |        |
|    | Zotarolimus-eluting stent (ENDEAVOR™)       | -          | 49 (1.8%)  |        |
| 9  | CABG                                        | 98 (2.3%)  | 98 (2.1%)  | 0.48   |
| 10 | Off pump                                    | 34 (35%)   | 43 (44%)   | 0.19   |
| 11 | ITA use                                     | 82 (84%)   | 80 (82%)   | 0.71   |
| 13 | <b>(E) Baseline Medications</b>             |            |            |        |
| 15 | Antiplatelet therapy                        |            |            |        |
| 17 | Thienopyridine                              | 3993 (93%) | 4521 (96%) | <0.001 |
| 18 | Ticlopidine                                 | 3652 (85%) | 124 (2.6%) | <0.001 |
| 19 | Clopidogrel                                 | 340 (7.9%) | 4339 (92%) | <0.001 |
| 22 | Aspirin                                     | 4209 (98%) | 4636 (98%) | 0.45   |
| 23 | Cilostazol                                  | 1501 (35%) | 116 (2.5%) | <0.001 |
| 25 | Statins                                     | 2281 (53%) | 3885 (82%) | <0.001 |
| 27 | High-intensity statins therapy <sup>§</sup> | 67 (1.6%)  | 78 (1.7%)  | 0.81   |
| 29 | Beta-blockers                               | 1747 (41%) | 2555 (54%) | <0.001 |
| 30 | ACE inhibitors/ARB                          | 3040 (71%) | 3554 (75%) | <0.001 |
| 32 | Nitrates                                    | 1269 (30%) | 832 (18%)  | <0.001 |
| 34 | Calcium channel blockers                    | 885 (21%)  | 970 (21%)  | 0.88   |
| 35 | Nicorandil                                  | 1198 (28%) | 966 (20%)  | <0.001 |
| 37 | Warfarin                                    | 495 (12%)  | 591 (13%)  | 0.18   |
| 38 | DOAC                                        | -          | 61 (1.3%)  | -      |
| 40 | Proton pump inhibitors                      | 1470 (34%) | 3505 (74%) | <0.001 |
| 42 | Histamine type-2 receptor blockers          | 1393 (33%) | 553 (12%)  | <0.001 |

1 Continuous variables were expressed as mean  $\pm$  standard deviation, or median (interquartile  
2 range). Categorical variables were expressed as number (percentage).

3 There were missing values for body mass index in 341 patients (Wave-1: 232 [5.4%] and  
4 Wave-2: 109 [2.3%]), for LVEF in 1385 patients (Wave-1: 951 [22%] and Wave-2: 434  
5 [9.2%]), for eGFR in 94 patients (Wave-1: 80 [1.9%] and Wave-2: 14 [0.3%]), for  
6 hemoglobin level in 110 patients (Wave-1: 99 [2.3%] and Wave-2: 11 [0.2%]), for platelet  
7 count in 47 patients (Wave-1: 29 [0.7%] and Wave-2: 18 [0.4%]), for max CK in 91 patients  
8 (Wave-1: 39 [0.9%] and Wave-2: 52 [1.1%]). The numbers of missing values for body mass

1 index, eGFR, hemoglobin level, and platelet count were negligibly small. The missing values  
2 for these variables were imputed as “normal” in the binary classification, because data should  
3 have been available if abnormalities were suspected. On the other hands, the missing values  
4 for LVEF were not imputed in the categorical classification, because the numbers of missing  
5 values were substantial for these variables. Onset to balloon time and door to balloon time  
6 were analyzed only for patients who underwent PCI within 24 hours of the onset of  
7 symptoms excluding nosocomial onset (onset to balloon time: 3271 patients in Wave-1 and  
8 3372 patients in Wave-2; door to balloon time: 3228 patients in Wave-1 and 3242 patients in  
9 Wave-2).

10 \*Risk-adjusting variables for the Cox proportional hazard models

11 §High-intensity statins therapy in this study was defined as the statin doses greater than or  
12 equal to atorvastatin 20 mg, pitavastatin 4 mg, or rosuvastatin 10 mg.

13 PCI=percutaneous coronary intervention; CABG=coronary artery bypass grafting;

14 ESRD=end-stage renal disease; eGFR=estimated glomerular filtration rate; ITA=internal  
15 thoracic artery; CK=creatinine kinase; ACE inhibitor/ARB=angiotensin-converting enzyme  
16 inhibitor/angiotensin receptor blocker; DOAC=direct oral anticoagulants.

1 **Table 2. Clinical outcomes comparing between Wave-1 and Wave-2**

| Endpoints                                       | Wave-1<br>(N=4278)<br>N of patients with event<br>(Cumulative 3-year incidence) | Wave-2<br>(N=4723)<br>N of patients with event<br>(Cumulative 3-year incidence) | Crude HR<br>(95% CI) | P value | Adjusted HR<br>(95% CI) | P value |
|-------------------------------------------------|---------------------------------------------------------------------------------|---------------------------------------------------------------------------------|----------------------|---------|-------------------------|---------|
| All-cause death                                 | 654 (15.5%)                                                                     | 722 (15.7%)                                                                     | 1.02 (0.91-1.13)     | 0.77    | 0.92 (0.83-1.03)        | 0.14    |
| Cardiovascular death                            | 475 (11.3%)                                                                     | 524 (11.4%)                                                                     | 1.01 (0.89-1.15)     | 0.86    | 0.93 (0.82-1.06)        | 0.26    |
| Cardiac death                                   | 448 (10.7%)                                                                     | 489 (10.7%)                                                                     | 1.00 (0.88-1.14)     | 1.00    | 0.93 (0.81-1.05)        | 0.24    |
| Sudden cardiac death                            | 47 (1.2%)                                                                       | 45 (1.1%)                                                                       | 0.88 (0.59-1.33)     | 0.54    | 0.76 (0.50-1.15)        | 0.19    |
| Non-cardiovascular death                        | 179 (4.7%)                                                                      | 198 (4.8%)                                                                      | 1.03 (0.84-1.26)     | 0.80    | 0.90 (0.73-1.10)        | 0.29    |
| Non-cardiac death                               | 206 (5.4%)                                                                      | 233 (5.7%)                                                                      | 1.05 (0.87-1.27)     | 0.61    | 0.91 (0.75-1.10)        | 0.34    |
| Myocardial infarction                           | 169 (4.3%)                                                                      | 202 (4.8%)                                                                      | 1.10 (0.90-1.35)     | 0.36    | 1.04 (0.85-1.28)        | 0.72    |
| Definite stent thrombosis*                      | 81 (2.3%)                                                                       | 60 (1.5%)                                                                       | 0.65 (0.47-0.91)     | 0.01    | 0.59 (0.43-0.81)        | 0.001   |
| Stroke                                          | 191 (4.9%)                                                                      | 243 (5.7%)                                                                      | 1.17 (0.97-1.42)     | 0.10    | 1.09 (0.90-1.31)        | 0.40    |
| Hospitalization for heart failure               | 267 (7.0%)                                                                      | 305 (7.4%)                                                                      | 1.06 (0.90-1.25)     | 0.50    | 0.97 (0.82-1.14)        | 0.68    |
| Major bleeding                                  | 492 (12.0%)                                                                     | 741 (16.5%)                                                                     | 1.39 (1.25-1.56)     | <0.001  | 1.34 (1.20-1.51)        | 0.005   |
| Any coronary revascularization                  | 1277 (33.0%)                                                                    | 1112 (26.6%)                                                                    | 0.76 (0.70-0.83)     | <0.001  | 0.75 (0.69-0.81)        | <0.001  |
| Ischemia-driven any coronary revascularization  | 472 (12.3%)                                                                     | 522 (12.6%)                                                                     | 1.02 (0.90-1.15)     | 0.80    | 0.99 (0.87-1.12)        | 0.87    |
| Target vessel revascularization                 | 1017 (26.3%)                                                                    | 816 (19.5%)                                                                     | 0.70 (0.64-0.77)     | <0.001  | 0.69 (0.63-0.76)        | <0.001  |
| Ischemia-driven target vessel revascularization | 353 (9.1%)                                                                      | 364 (8.7%)                                                                      | 0.94 (0.81-1.09)     | 0.43    | 0.92 (0.79-1.06)        | 0.25    |

2 The risk of Wave-2 relative to Wave-1 was expressed as HR with 95%CI. The covariates for the multivariate Cox proportional hazard models

3 were indicated in Table 1.

4 Myocardial infarction was based on the ARTS definition.

1 \*Definite stent thrombosis was based on the ARC definition, and was analyzed only for patients who underwent PCI with stent implantation

2 (3739 patients in Wave-1 and 4241 patients in Wave-2).

3 Major bleeding was defined as GUSTO moderate/severe bleeding.

4 HR=hazard ratio; CI=confidence interval; ARTS=arterial revascularization therapy study; ARC=academic research consortium; GUSTO=global

5 utilization of streptokinase and tissue plasminogen activator for occluded coronary arteries.

6

For peer review only

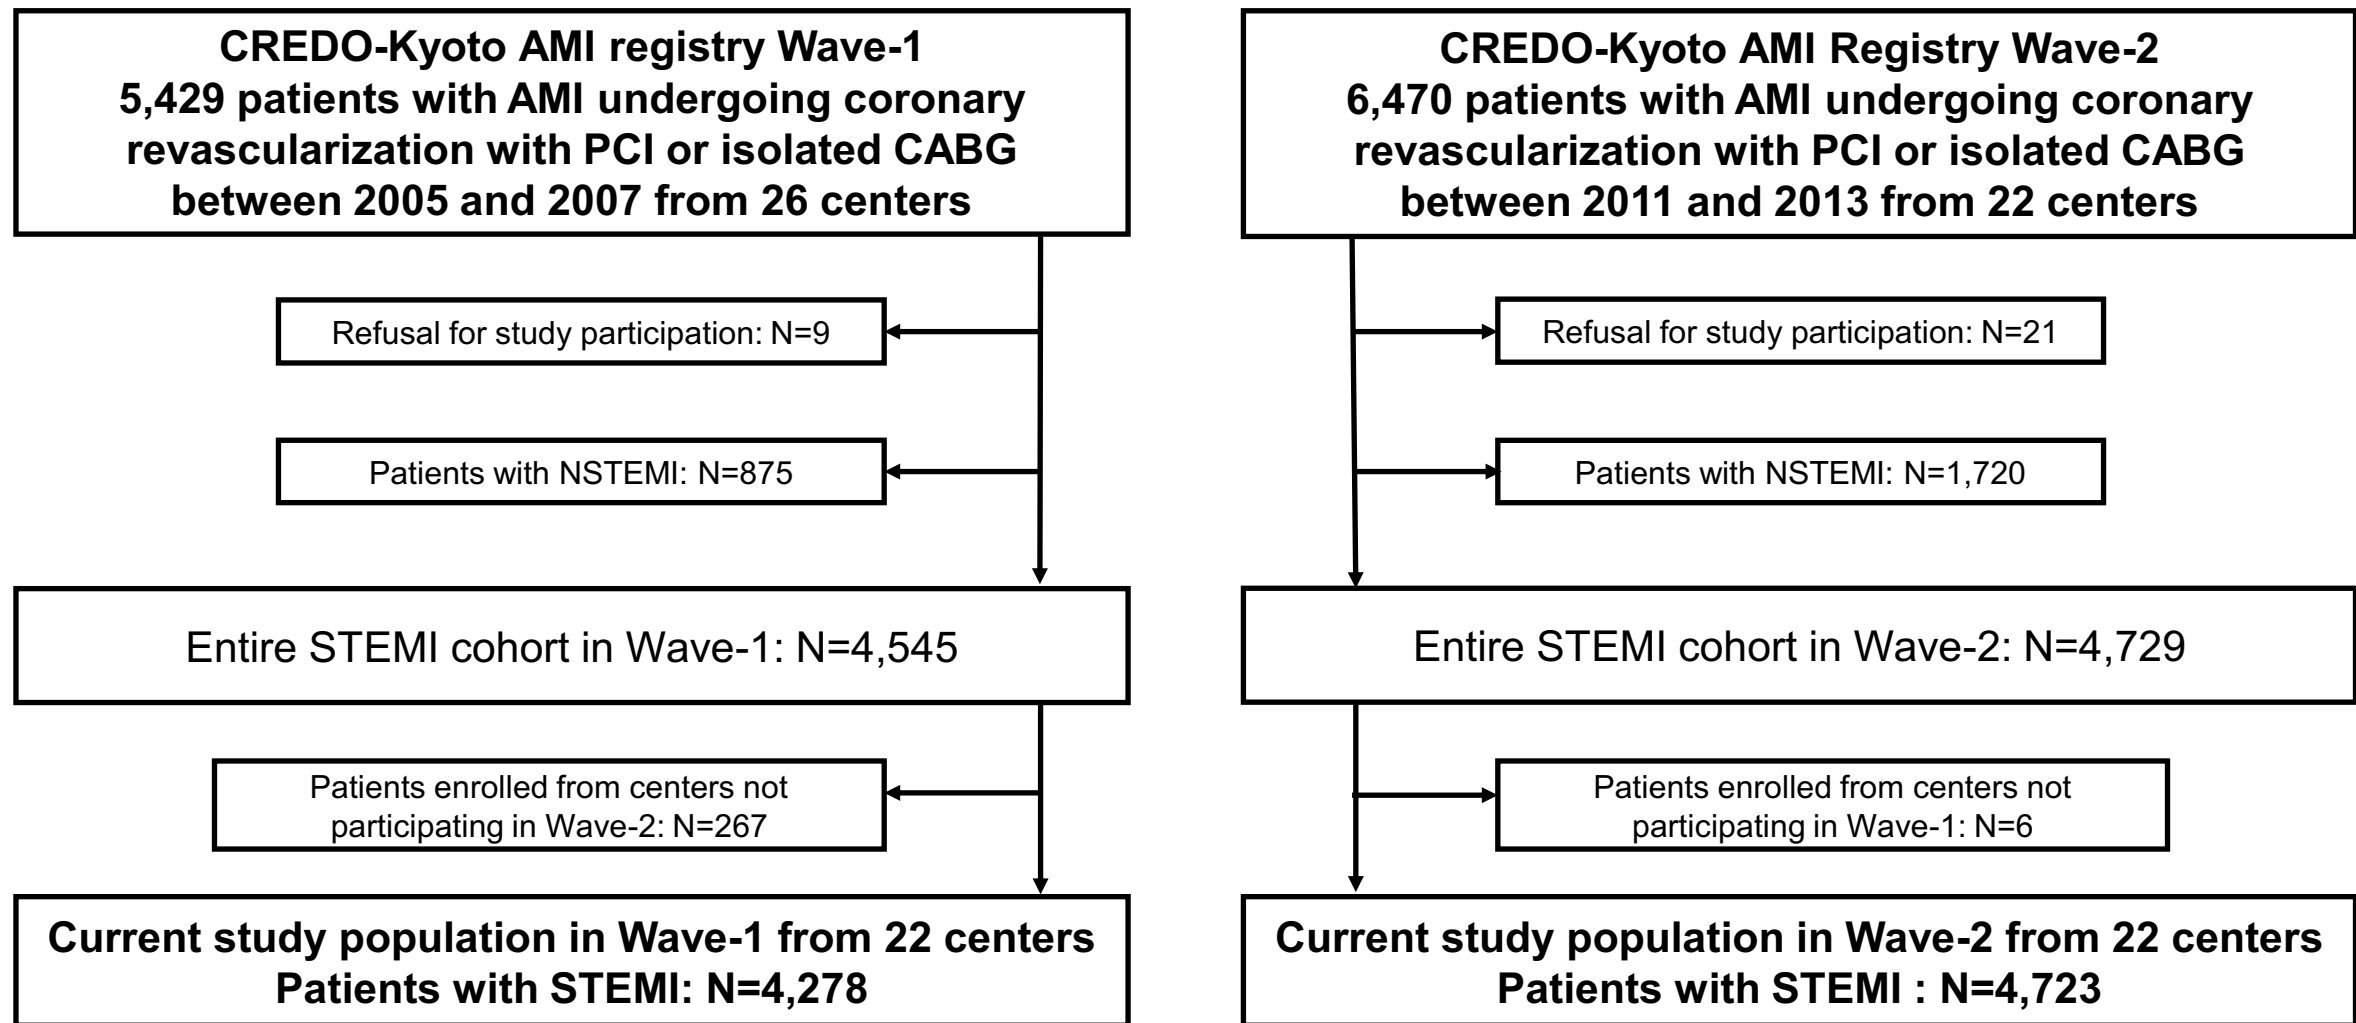

**(A) All-cause death**

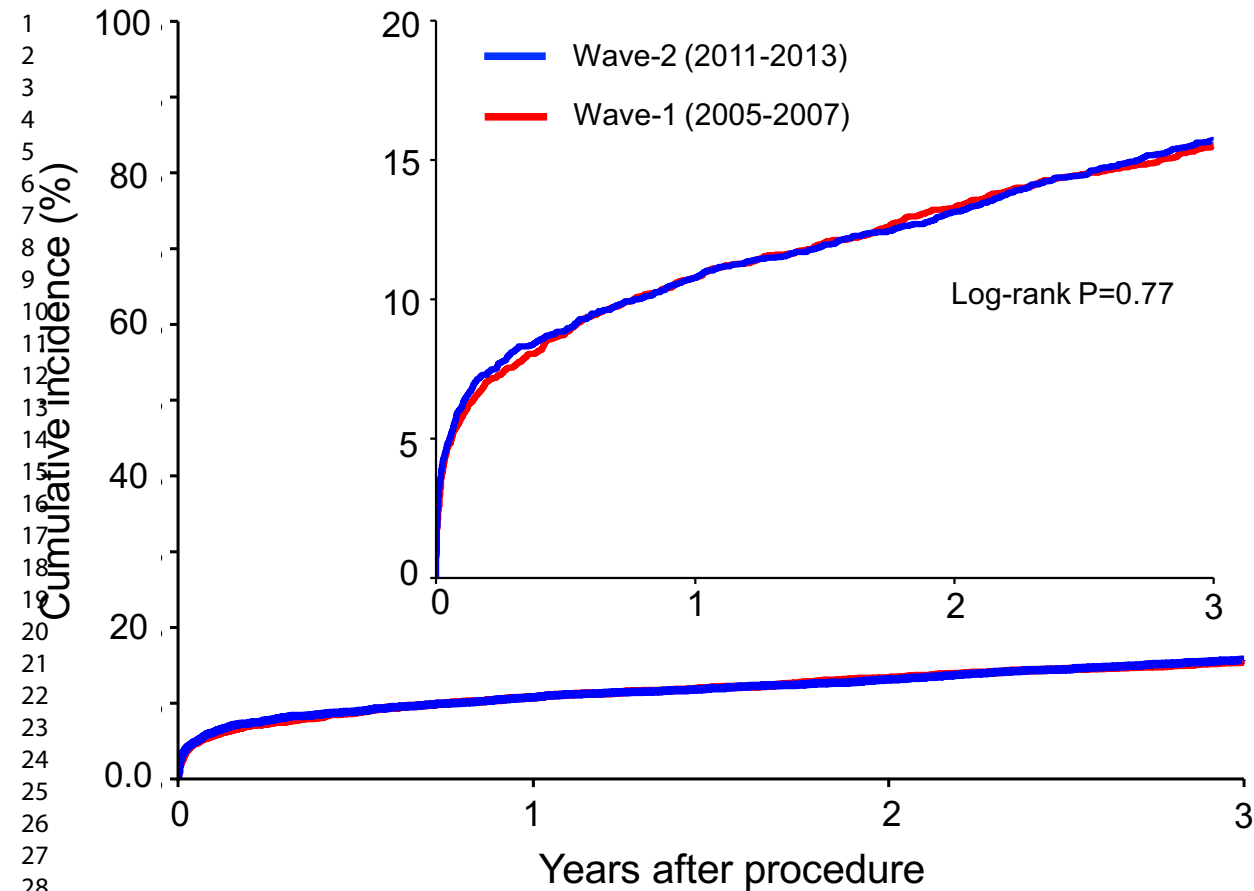

| Interval                 | 0 day | 30 days | 1 year | 2 years | 3 years |
|--------------------------|-------|---------|--------|---------|---------|
| <b>Wave-2</b>            |       |         |        |         |         |
| N of patients at risk    | 4723  | 4395    | 4041   | 3858    | 3685    |
| N of patients with event |       | 280     | 502    | 608     | 722     |
| Cumulative incidence     |       | 5.9%    | 10.8%  | 13.1%   | 15.7%   |
| <b>Wave-1</b>            |       |         |        |         |         |
| N of patients at risk    | 4278  | 4023    | 3744   | 3602    | 3454    |
| N of patients with event |       | 235     | 458    | 564     | 654     |
| Cumulative incidence     |       | 5.5%    | 10.8%  | 13.3%   | 15.5%   |

**(B) Cardiovascular death**

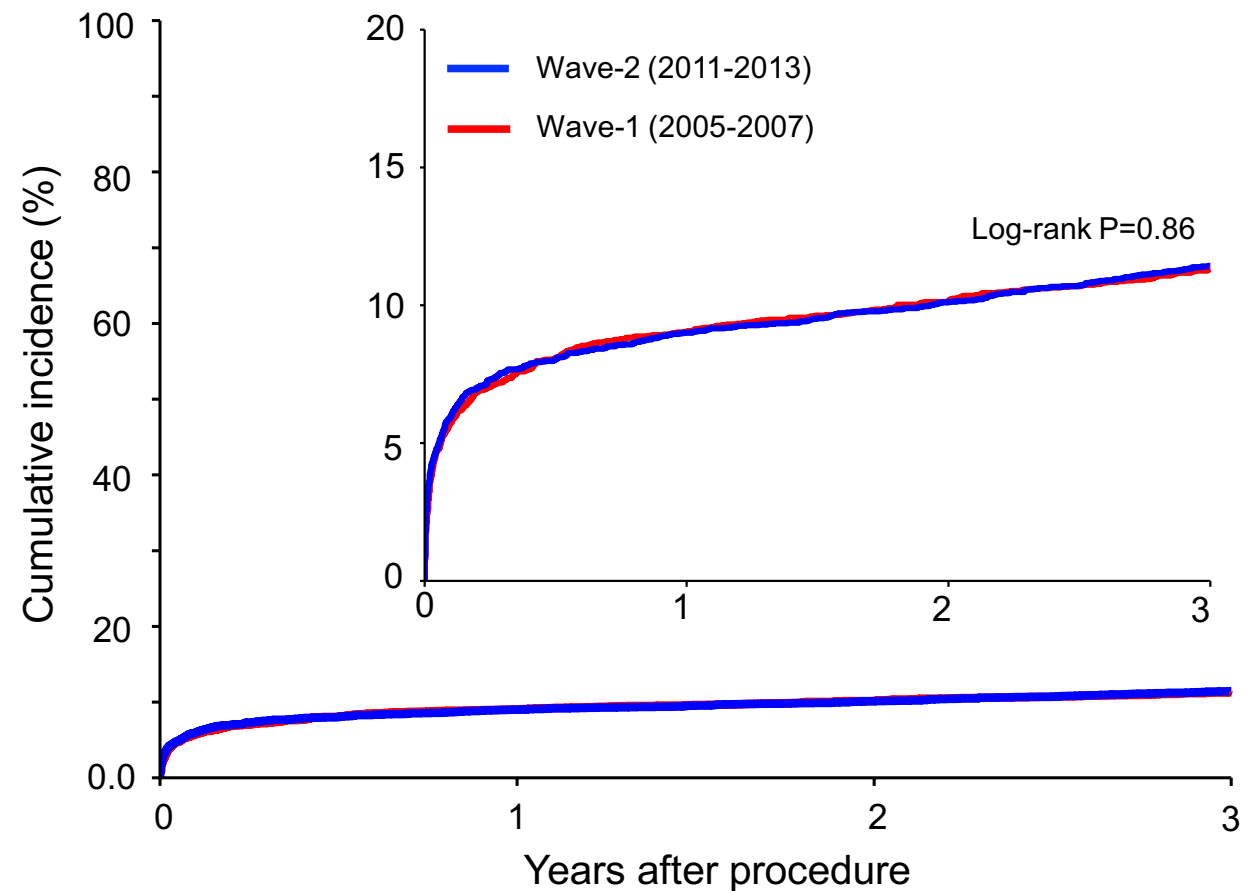

| Interval                 | 0 day | 30 days | 1 year | 2 years | 3 years |
|--------------------------|-------|---------|--------|---------|---------|
| <b>Wave-2</b>            |       |         |        |         |         |
| N of patients at risk    | 4723  | 4395    | 4041   | 3858    | 3685    |
| N of patients with event |       | 272     | 420    | 468     | 524     |
| Cumulative incidence     |       | 5.8%    | 9%     | 10.1%   | 11.4%   |
| <b>Wave-1</b>            |       |         |        |         |         |
| N of patients at risk    | 4278  | 4023    | 3744   | 3602    | 3454    |
| N of patients with event |       | 234     | 384    | 430     | 475     |
| Cumulative incidence     |       | 5.5%    | 9%     | 10.2%   | 11.3%   |

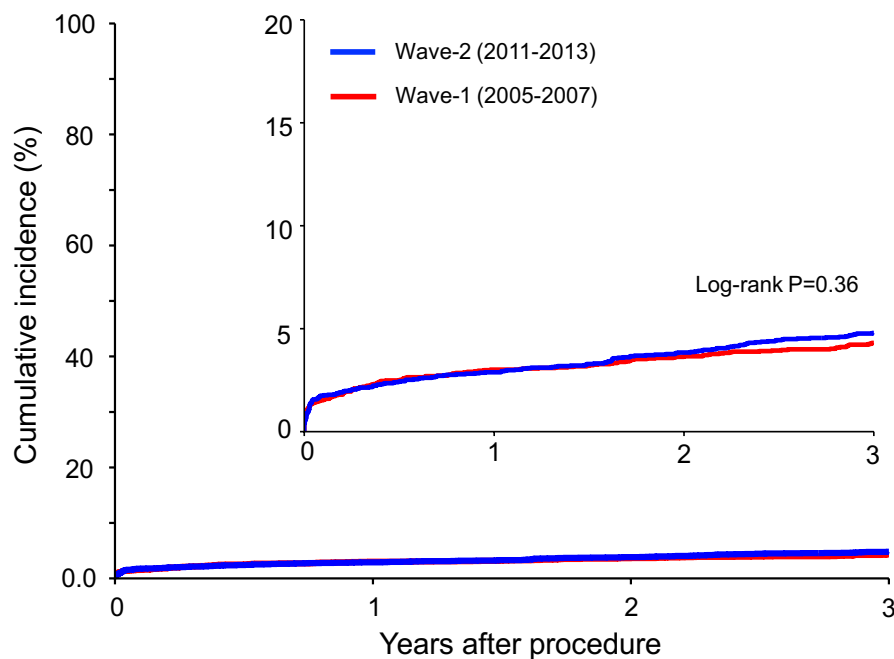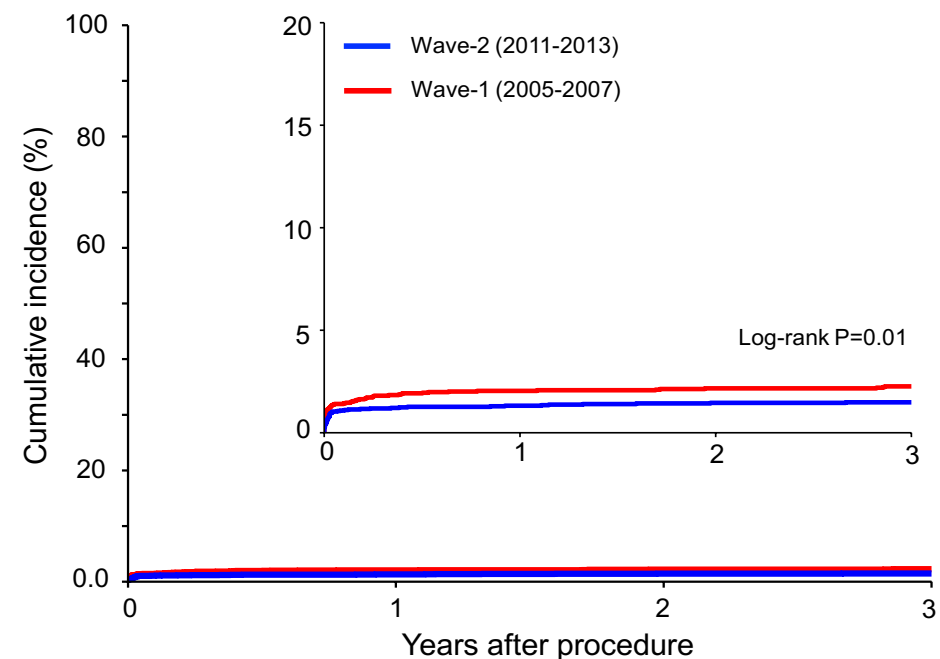

| Interval                 | 0 day | 30 days | 1 year | 2 years | 3 years |
|--------------------------|-------|---------|--------|---------|---------|
| <b>Wave-2</b>            |       |         |        |         |         |
| N of patients at risk    | 4723  | 4332    | 3940   | 3729    | 3539    |
| N of patients with event |       | 79      | 128    | 166     | 202     |
| Cumulative incidence     |       | 1.7%    | 2.9%   | 3.8%    | 4.8%    |
| <b>Wave-1</b>            |       |         |        |         |         |
| N of patients at risk    | 4278  | 3967    | 3651   | 3499    | 3337    |
| N of patients with event |       | 64      | 122    | 146     | 169     |
| Cumulative incidence     |       | 1.5%    | 3.0%   | 3.7%    | 4.3%    |

| Interval                 | 0 day | 30 days | 1 year | 2 years | 3 years |
|--------------------------|-------|---------|--------|---------|---------|
| <b>Wave-2</b>            |       |         |        |         |         |
| N of patients at risk    | 4241  | 3945    | 3642   | 3476    | 3335    |
| N of patients with event |       | 45      | 54     | 59      | 60      |
| Cumulative incidence     |       | 1.1%    | 1.3%   | 1.5%    | 1.5%    |
| <b>Wave-1</b>            |       |         |        |         |         |
| N of patients at risk    | 3739  | 3494    | 3257   | 3137    | 3012    |
| N of patients with event |       | 52      | 74     | 78      | 81      |
| Cumulative incidence     |       | 1.4%    | 2.0%   | 2.2%    | 2.3%    |

(C) Major bleeding

(D) Any coronary revascularization

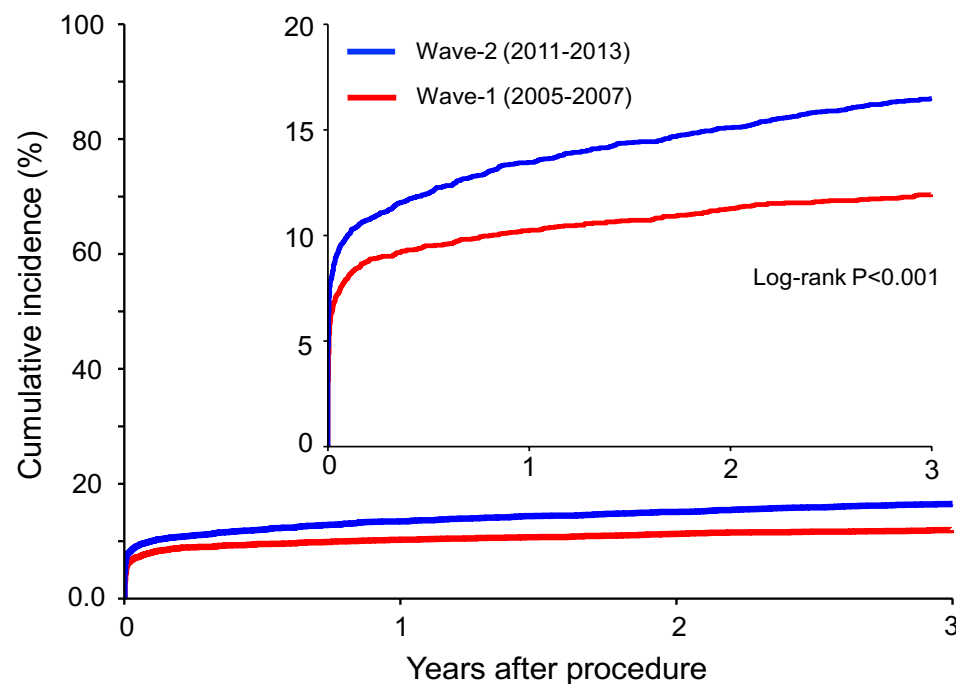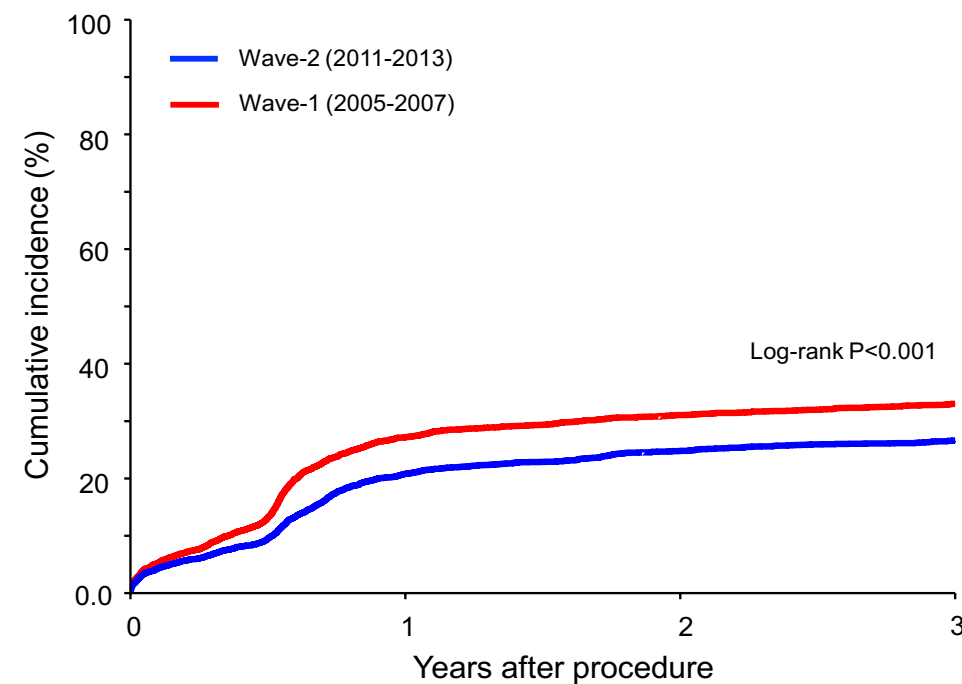

| Interval                 | 0 day | 30 days | 1 year | 2 years | 3 years |
|--------------------------|-------|---------|--------|---------|---------|
| <b>Wave-2</b>            |       |         |        |         |         |
| N of patients at risk    | 4723  | 4067    | 3665   | 3453    | 3276    |
| N of patients with event |       | 457     | 618    | 686     | 741     |
| Cumulative incidence     |       | 9.8%    | 13.5%  | 15.1%   | 16.5%   |
| <b>Wave-1</b>            |       |         |        |         |         |
| N of patients at risk    | 4278  | 3773    | 3485   | 3393    | 3180    |
| N of patients with event |       | 331     | 428    | 467     | 492     |
| Cumulative incidence     |       | 7.8%    | 10.3%  | 11.3%   | 12.0%   |

| Interval                 | 0 day | 30 days | 1 year | 2 years | 3 years |
|--------------------------|-------|---------|--------|---------|---------|
| <b>Wave-2</b>            |       |         |        |         |         |
| N of patients at risk    | 4723  | 4236    | 3210   | 2894    | 2690    |
| N of patients with event |       | 178     | 885    | 1043    | 1112    |
| Cumulative incidence     |       | 3.9%    | 20.8%  | 24.8%   | 26.6%   |
| <b>Wave-1</b>            |       |         |        |         |         |
| N of patients at risk    | 4278  | 3836    | 2735   | 2487    | 2298    |
| N of patients with event |       | 206     | 1066   | 1209    | 1277    |
| Cumulative incidence     |       | 5.0%    | 27.2%  | 31.1%   | 33.0%   |

1  
2  
3 **SUPPLEMENTARY MATERIAL**  
4

5  
6 **Table of contents**  
7

8  
9 **Supplementary Appendix (A-C) .....2**  
10

11 **Supplementary figure legends (I-IV) .....9**  
12  
13  
14  
15  
16  
17  
18  
19  
20  
21  
22  
23  
24  
25  
26  
27  
28  
29  
30  
31  
32  
33  
34  
35  
36  
37  
38  
39  
40  
41  
42  
43  
44  
45  
46  
47  
48  
49  
50  
51  
52  
53  
54  
55  
56  
57  
58  
59  
60

For peer review only



## Supplemental Appendix A: List of participating centers and investigators

### The CREDO-Kyoto AMI Registry Wave-1

#### Cardiology

Kyoto University Hospital: Takeshi Kimura, Hiroki Shiomi

Kishiwada City Hospital: Mitsuo Matsuda, Hirokazu Mitsuoka

Tenri Hospital: Yoshihisa Nakagawa

Hyogo Prefectural Amagasaki Hospital: Hisayoshi Fujiwara, Yoshiki Takatsu, Ryoji

Taniguchi

Kitano Hospital: Ryuji Nohara

Koto Memorial Hospital: Tomoyuki Murakami, Teruki Takeda

Kokura Memorial Hospital: Masakiyo Nobuyoshi, Masashi Iwabuchi

Maizuru Kyosai Hospital: Ryozo Tatami

Nara Hospital, Kinki University Faculty of Medicine: Manabu Shirovani

Kobe City Medical Center General Hospital: Toru Kita, Yutaka Furukawa, Natsuhiko Ehara

Nishi-Kobe Medical Center: Hiroshi Kato, Hiroshi Eizawa

Kansai Denryoku Hospital: Katsuhisa Ishii

Osaka Red Cross Hospital: Masaru Tanaka

University of Fukui Hospital: Jong-Dae Lee, Akira Nakano

Shizuoka City Shizuoka Hospital: Akinori Takizawa

Hamamatsu Rosai Hospital: Masaaki Takahashi

Shiga University of Medical Science Hospital: Minoru Horie, Hiroyuki Takashima

Japanese Red Cross Wakayama Medical Center: Takashi Tamura

Shimabara Hospital: Mamoru Takahashi

Kagoshima University Medical and Dental Hospital: Chuwa Tei, Shuichi Hamasaki

1  
2  
3 Shizuoka General Hospital: Hirofumi Kambara, Osamu Doi, Satoshi Kaburagi

4  
5 Kurashiki Central Hospital: Kazuaki Mitsudo, Kazushige Kadota

6  
7 Mitsubishi Kyoto Hospital: Shinji Miki, Tetsu Mizoguchi

8  
9 Kumamoto University Hospital: Hisao Ogawa, Seigo Sugiyama

10  
11 Shimada Municipal Hospital: Ryuichi Hattori, Takeshi Aoyama, Makoto Araki

12  
13 Juntendo University Shizuoka Hospital: Satoru Suwa

14  
15  
16  
17  
18  
19 **Cardiovascular Surgery**

20  
21 Kyoto University Hospital: Ryuzo Sakata, Tadashi Ikeda, Akira Marui

22  
23 Kishiwada City Hospital: Masahiko Onoe

24  
25 Tenri Hospital: Kazuo Yamanaka

26  
27 Hyogo Prefectural Amagasaki Hospital: Keiichi Fujiwara, Nobuhisa Ohno

28  
29 Kokura Memorial Hospital: Michiya Hanyu

30  
31 Maizuru Kyosai Hospital: Tsutomu Matsushita

32  
33 Nara Hospital, Kinki University Faculty of Medicine: Noboru Nishiwaki, Yuichi Yoshida

34  
35 Kobe City Medical Center General Hospital: Yukikatsu Okada, Michihiro Nasu

36  
37 Osaka Red Cross Hospital: Shogo Nakayama

38  
39 University of Fukui Hospital: Kuniyoshi Tanaka, Takaaki Koshiji, Koichi Morioka

40  
41 Shizuoka City Shizuoka Hospital: Mitsuomi Shimamoto, Fumio Yamazaki

42  
43 Hamamatsu Rosai Hospital: Junichiro Nishizawa

44  
45 Japanese Red Cross Wakayama Medical Center: Masaki Aota

46  
47 Shimabara Hospital: Takafumi Tabata

48  
49 Kagoshima University Medica and Dental Hospital: Yutaka Imoto, Hiroyuki Yamamoto

50  
51 Shizuoka General Hospital: Katsuhiko Matsuda, Masafumi Nara

52  
53 Kurashiki Central Hospital: Tatsuhiko Komiya

1  
2  
3  
4  
5  
6  
7  
8  
9  
10  
11  
12  
13  
14  
15  
16  
17  
18  
19  
20  
21  
22  
23  
24  
25  
26  
27  
28  
29  
30  
31  
32  
33  
34  
35  
36  
37  
38  
39  
40  
41  
42  
43  
44  
45  
46  
47  
48  
49  
50  
51  
52  
53  
54  
55  
56  
57  
58  
59  
60

Mitsubishi Kyoto Hospital: Hiroyuki Nakajima

Kumamoto University Hospital: Michio Kawasuji, Syuji Moriyama

Juntendo University Shizuoka Hospital: Keichi Tanbara

For peer review only

## **The CREDO-Kyoto AMI Registry Wave-2**

### **Cardiology**

Kyoto University Hospital: Takeshi Kimura, Hiroki Shiomi

Kishiwada City Hospital: Mitsuo Matsuda, Takashi Uegaito

Tenri Hospital: Toshihiro Tamura

Hyogo Prefectural Amagasaki General Medical Center: Yukihiro Sato, Ryoji Taniguchi

Kitano Hospital: Moriaki Inoko

Koto Memorial Hospital: Tomoyuki Murakami, Teruki Takeda

Kokura Memorial Hospital: Kenji Ando, Takenori Domei

Kindai University Nara Hospital: Manabu Shirotani

Kobe City Medical Center General Hospital: Yutaka Furukawa, Natsuhiko Ehara

Kobe City Nishi-Kobe Medical Center: Hiroshi Eizawa

Kansai Denryoku Hospital: Katsuhisa Ishii, Eiji Tada

Osaka Red Cross Hospital: Masaru Tanaka, Tsukasa Inada

Shizuoka City Shizuoka Hospital: Tomoya Onodera, Ryuzo Nawada

Hamamatsu Rosai Hospital: Eiji Shinoda, Miho Yamada

Shiga University of Medical Science Hospital: Takashi Yamamoto, Hiroshi Sakai

Japanese Red Cross Wakayama Medical Center: Takashi Tamura, Mamoru Toyofuku

Shimabara Hospital: Mamoru Takahashi

Shizuoka General Hospital: Hiroki Sakamoto, Tomohisa Tada

Kurashiki Central Hospital: Kazushige Kadota, Takeshi Tada

Mitsubishi Kyoto Hospital: Shinji Miki, Kazuhisa Kaneda

Shimada Municipal Hospital: Takeshi Aoyama

Juntendo University Shizuoka Hospital: Satoru Suwa

**Cardiovascular Surgery**

Kyoto University Hospital: Kenji Minatoya, Kazuhiro Yamazaki

Kishiwada City Hospital: Tatsuya Ogawa

Tenri Hospital: Atsushi Iwakura

Hyogo Prefectural Amagasaki General Medical Center: Nobuhisa Ohno

Kitano Hospital: Michiya Hanyu

Kokura Memorial Hospital: Yoshiharu Soga, Akira Marui

Kindai University Nara Hospital: Nobushige Tamura

Kobe City Medical Center General Hospital: Tadaaki Koyama

Osaka Red Cross Hospital: Shogo Nakayama

Shizuoka City Shizuoka Hospital: Fumio Yamazaki, Yasuhiko Terai

Hamamatsu Rosai Hospital: Junichiro Nishizawa

Japanese Red Cross Wakayama Medical Center: Naoki Kanemitsu, Hiroyuki Hara

Shizuoka General Hospital: Hiroshi Tsuneyoshi

Kurashiki Central Hospital: Tatsuhiko Komiya

Mitsubishi Kyoto Hospital: Jiro Esaki

Juntendo University Shizuoka Hospital: Keiichi Tambara

1  
2  
3 **Supplemental Appendix B: List of clinical research coordinators**  
4

5 **The CREDO-Kyoto AMI Registry Wave-1**  
6

7  
8 Research Institute for Production Development  
9

10 Kumiko Kitagawa, Misato Yamauchi, Naoko Okamoto, Yumika Fujino, Saori Tezuka, Asuka  
11

12 Saeki, Miya Hanazawa, Yuki Sato, Chikako Hibi, Hitomi Sasae, Emi Takinami, Yuriko  
13

14 Uchida, Yuko Yamamoto, Satoko Nishida, Mai Yoshimoto, Sachiko Maeda, Izumi Miki,  
15

16  
17 Saeko Minematsu  
18  
19  
20

21 **The CREDO-Kyoto AMI Registry Wave-2**  
22

23  
24 Research Institute for Production Development  
25

26 Sakiko Arimura, Yumika Fujino, Miya Hanazawa, Chikako Hibi, Risa Kato, Yui Kinoshita,  
27

28 Kumiko Kitagawa, Masayo Kitamura, Takahiro Kuwahara, Satoko Nishida, Naoko Okamoto,  
29

30 Yuki Sato, Saori Tezuka, Marina Tsuda, Miyuki Tsumori, Misato Yamauchi, Itsuki  
31

32  
33 Yamazaki  
34  
35  
36  
37  
38  
39  
40  
41  
42  
43  
44  
45  
46  
47  
48  
49  
50  
51  
52  
53  
54  
55  
56  
57  
58  
59  
60

## Supplemental Appendix C: List of the clinical event committee members

### The CREDO-Kyoto AMI Registry Wave-1

Mitsuru Abe (Kyoto Medical Center), Hiroki Shiomi (Kyoto University Hospital), Tomohisa Tada (Deutsches Herzzentrum), Junichi Tazaki (Kyoto University Hospital), Yoshihiro Kato (Saiseikai Noe Hospital), Mamoru Hayano (Gunma Cardiovascular Center), Akihiro Tokushige (Kagoshima University Hospital), Masahiro Natsuaki (Kyoto University Hospital), Tetsu Nakajima (Kyoto University Hospital).

### The CREDO-Kyoto AMI Registry Wave-2

Masayuki Fuki (Kyoto University Hospital), Eri Toda Kato (Kyoto University Hospital), Yukiko Matsumura-Nakano (Kyoto University Hospital), Kenji Nakatsuma (Mitsubishi Kyoto Hospital), Hiroki Shiomi (Kyoto University Hospital), Yasuaki Takeji (Kyoto University Hospital), Hidenori Yaku (Mitsubishi Kyoto Hospital), Erika Yamamoto (Kyoto University Hospital), Ko Yamamoto (Kyoto University Hospital), Yugo Yamashita (Kyoto University Hospital), Yusuke Yoshikawa (Kyoto University Hospital), Hiroki Watanabe (Japanese Red Cross Wakayama Medical Center)

## Supplementary figure legends

**Supplemental Figure I. Landmark analysis within and beyond 30 days for all-cause death comparing between Wave-1 and Wave-2 in (A) entire study population, (B) patients with cardiogenic shock, and (C) patients without cardiogenic shock**

HR=hazard ratio; CI=confidence interval.

**Supplemental Figure II. Landmark analysis within and beyond 30 days for major bleeding comparing between Wave-1 and Wave-2**

Major bleeding was defined as GUSTO moderate/severe bleeding.

HR=hazard ratio; CI=confidence interval; GUSTO=global utilization of streptokinase and tissue plasminogen activator for occluded coronary arteries.

**Supplemental Figure III . Kaplan-Meier curves for major bleeding comparing between Wave-1 and Wave-2 (A) in patients with ARC-HBR and (B) in patients without ARC-HBR**

ARC-HBR=academic research consortium-high bleeding risk; HR=hazard ratio; CI=confidence interval.

**Supplemental Figure IV. Kaplan-Meier curves for persistent DAPT discontinuation comparing between Wave-1 and Wave-2**

Persistent discontinuation of DAPT was defined as withdrawal of either thienopyridines or aspirin for at least 2 months.

DAPT=dual antiplatelet therapy.



1 Supplemental Figure I. Landmark analysis within and beyond 30 days for all-cause  
 2 death comparing between Wave-1 and Wave-2 (A) in entire study population, (B) in  
 3 patients with cardiogenic shock, and (C) in patients without cardiogenic shock

(A) All-cause death in entire study population

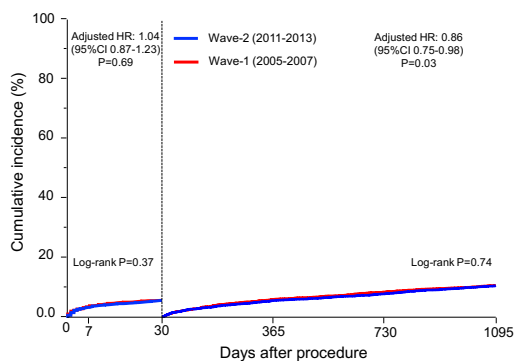

| Interval                 | 0 day | 7 days | 30 days | 1 year | 2 years | 3 years |
|--------------------------|-------|--------|---------|--------|---------|---------|
| <b>Wave-2</b>            |       |        |         |        |         |         |
| N of patients at risk    | 4723  | 4551   | 4395    | 4041   | 3858    | 3685    |
| N of patients with event | 183   | 280    | 222     | 328    | 442     | 442     |
| Cumulative incidence     |       | 3.9%   | 5.9%    | 5.1%   | 7.6%    | 10.4%   |
| <b>Wave-1</b>            |       |        |         |        |         |         |
| N of patients at risk    | 4278  | 4137   | 4023    | 3744   | 3602    | 3454    |
| N of patients with event | 154   | 235    | 223     | 329    | 419     | 419     |
| Cumulative incidence     |       | 3.6%   | 5.5%    | 5.6%   | 8.3%    | 10.6%   |

(B) All-cause death in patients with cardiogenic shock

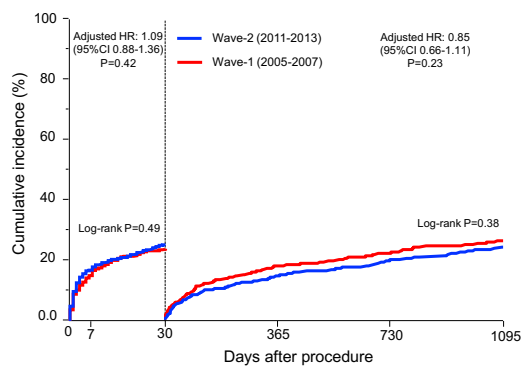

| Interval                 | 0 day | 7 days | 30 days | 1 year | 2 years | 3 years |
|--------------------------|-------|--------|---------|--------|---------|---------|
| <b>Wave-2</b>            |       |        |         |        |         |         |
| N of patients at risk    | 757   | 629    | 556     | 446    | 407     | 375     |
| N of patients with event | 136   | 193    | 73      | 100    | 123     | 123     |
| Cumulative incidence     |       | 18.0%  | 25.6%   | 13.7%  | 19.0%   | 23.6%   |
| <b>Wave-1</b>            |       |        |         |        |         |         |
| N of patients at risk    | 596   | 506    | 450     | 370    | 346     | 317     |
| N of patients with event | 100   | 143    | 74      | 96     | 114     | 114     |
| Cumulative incidence     |       | 16.8%  | 24.0%   | 16.6%  | 21.5%   | 25.7%   |

(C) All-cause death in patients without cardiogenic shock

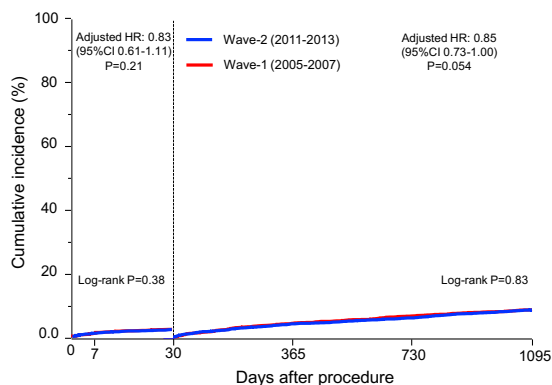

| Interval                 | 0 day | 7 days | 30 days | 1 year | 2 years | 3 years |
|--------------------------|-------|--------|---------|--------|---------|---------|
| <b>Wave-2</b>            |       |        |         |        |         |         |
| N of patients at risk    | 3966  | 3922   | 3839    | 3595   | 3451    | 3310    |
| N of patients with event | 47    | 87     | 149     | 228    | 319     | 319     |
| Cumulative incidence     |       | 1.2%   | 2.2%    | 3.9%   | 6.1%    | 8.6%    |
| <b>Wave-1</b>            |       |        |         |        |         |         |
| N of patients at risk    | 3682  | 3631   | 3573    | 3374   | 3256    | 3137    |
| N of patients with event | 54    | 92     | 149     | 233    | 305     | 305     |
| Cumulative incidence     |       | 1.5%   | 2.5%    | 4.2%   | 6.6%    | 8.7%    |

1 Supplemental Figure II. Landmark analysis within and beyond 30 days for major  
 2 bleeding comparing between Wave-1 and Wave-2

3  
 4  
 5  
 6  
 7  
 8 **Major bleeding**

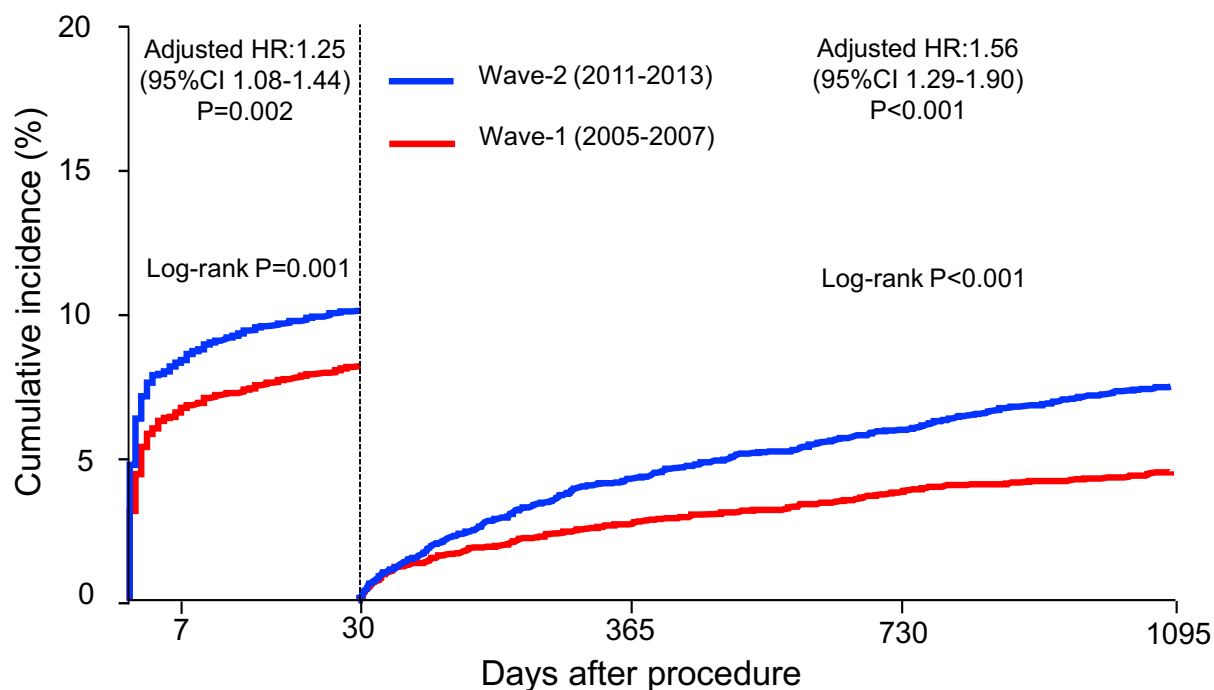

| Interval                 | 0 day | 7 days | 30 days | 1 year | 2 years | 3 years |
|--------------------------|-------|--------|---------|--------|---------|---------|
| <b>Wave-2</b>            |       |        |         |        |         |         |
| N of patients at risk    | 4723  | 4234   | 4067    | 3665   | 3453    | 3276    |
| N of patients with event |       | 383    | 457     | 161    | 229     | 284     |
| Cumulative incidence     |       | 8.2%   | 9.8%    | 4.1%   | 5.9%    | 7.4%    |
| <b>Wave-1</b>            |       |        |         |        |         |         |
| N of patients at risk    | 4278  | 3909   | 3773    | 3485   | 3333    | 3189    |
| N of patients with event |       | 272    | 331     | 97     | 136     | 161     |
| Cumulative incidence     |       | 6.4%   | 7.8%    | 2.6%   | 3.7%    | 4.5%    |

3

1 Supplemental Figure III. Kaplan-Meier curves for major bleeding comparing between Wave-1 and Wave-2 for major bleeding (A) in  
 2 patients with ARC-HBR and (B) in patients without ARC-HBR

(A) Major bleeding in patients with ARC-HBR

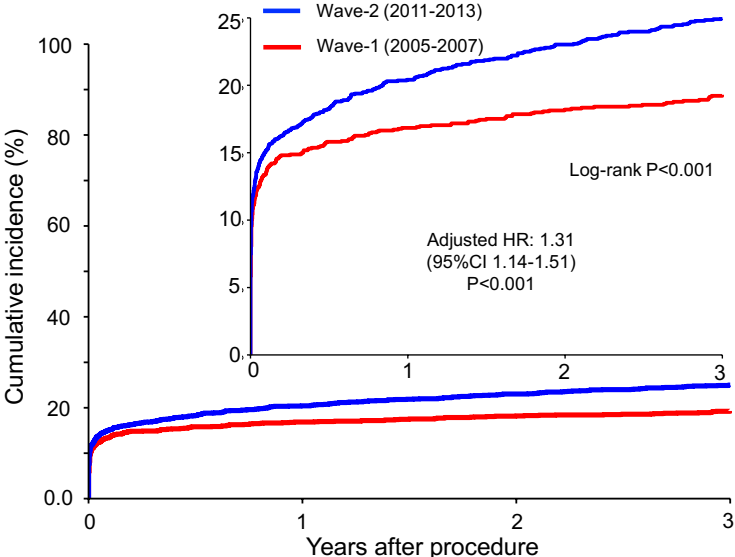

| Interval                 | 0 day | 30 days | 1 year | 2 years | 3 years |
|--------------------------|-------|---------|--------|---------|---------|
| <b>Wave-2</b>            |       |         |        |         |         |
| N of patients at risk    | 2213  | 1736    | 1454   | 1308    | 1199    |
| N of patients with event |       | 322     | 430    | 476     | 508     |
| Cumulative incidence     |       | 14.8%   | 20.4%  | 23.0%   | 25.0%   |
| <b>Wave-1</b>            |       |         |        |         |         |
| N of patients at risk    | 1811  | 1451    | 1259   | 1170    | 1082    |
| N of patients with event |       | 237     | 293    | 313     | 328     |
| Cumulative incidence     |       | 13.4%   | 16.8%  | 18.2%   | 19.3%   |

(B) Major bleeding in patients without ARC-HBR

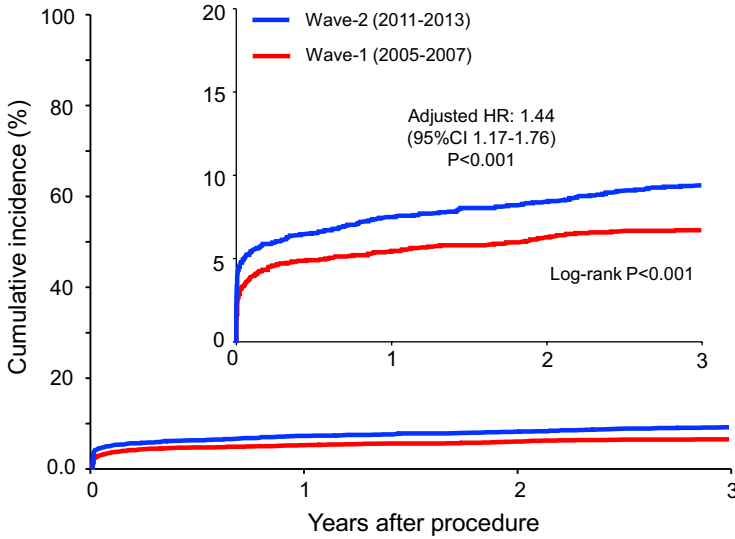

| Interval                 | 0 day | 30 days | 1 year | 2 years | 3 years |
|--------------------------|-------|---------|--------|---------|---------|
| <b>Wave-2</b>            |       |         |        |         |         |
| N of patients at risk    | 2510  | 2331    | 2211   | 2145    | 2077    |
| N of patients with event |       | 135     | 188    | 210     | 233     |
| Cumulative incidence     |       | 5.4%    | 7.6%   | 8.5%    | 9.5%    |
| <b>Wave-1</b>            |       |         |        |         |         |
| N of patients at risk    | 2467  | 2322    | 2226   | 2163    | 2107    |
| N of patients with event |       | 94      | 135    | 154     | 164     |
| Cumulative incidence     |       | 3.8%    | 5.5%   | 6.4%    | 6.8%    |

3

4

1 Supplemental Figure IV. Kaplan-Meier curves for persistent DAPT discontinuation  
 2 comparing between Wave-1 and Wave-2

3  
 4  
 5  
 6  
 7  
 8 **Persistent DAPT discontinuation**

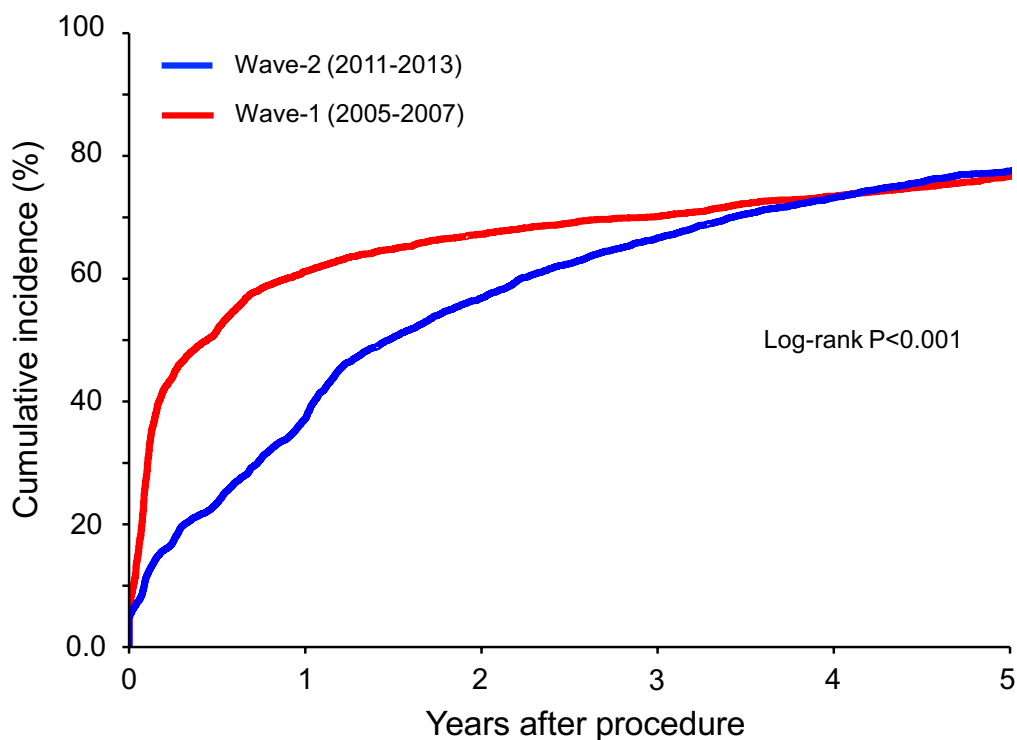

35  
 36  
 37  
 38  
 39  
 40  
 41  
 42  
 43

| Interval              | 0 day | 30 days | 1 year | 2 years | 3 years | 4 years | 5 years |
|-----------------------|-------|---------|--------|---------|---------|---------|---------|
| <b>Wave-2</b>         |       |         |        |         |         |         |         |
| N of patients at risk | 4625  | 3987    | 2603   | 1716    | 1272    | 971     | 700     |
| Cumulative incidence  |       | 9.6%    | 37.2%  | 56.9%   | 66.7%   | 73.2%   | 77.5%   |
| <b>Wave-1</b>         |       |         |        |         |         |         |         |
| N of patients at risk | 4180  | 3093    | 1457   | 1186    | 1029    | 849     | 442     |
| Cumulative incidence  |       | 23.7%   | 61.2%  | 67.3%   | 70.1%   | 73.4%   | 76.7%   |

44 3  
 45  
 46 4  
 47  
 48  
 49 5  
 50  
 51 6  
 52  
 53 7  
 54  
 55  
 56  
 57  
 58  
 59  
 60

STROBE Statement—Checklist of items that should be included in reports of *cohort studies*

|                              | Item No | Recommendation                                                                                                                                                                                    | Page No |
|------------------------------|---------|---------------------------------------------------------------------------------------------------------------------------------------------------------------------------------------------------|---------|
| <b>Title and abstract</b>    | 1       | (a) Indicate the study's design with a commonly used term in the title or the abstract<br>(b) Provide in the abstract an informative and balanced summary of what was done and what was found     | 1<br>3  |
| <b>Introduction</b>          |         |                                                                                                                                                                                                   |         |
| Background/rationale         | 2       | Explain the scientific background and rationale for the investigation being reported                                                                                                              | 6       |
| Objectives                   | 3       | State specific objectives, including any prespecified hypotheses                                                                                                                                  | 6       |
| <b>Methods</b>               |         |                                                                                                                                                                                                   |         |
| Study design                 | 4       | Present key elements of study design early in the paper                                                                                                                                           | 7       |
| Setting                      | 5       | Describe the setting, locations, and relevant dates, including periods of recruitment, exposure, follow-up, and data collection                                                                   | 7       |
| Participants                 | 6       | (a) Give the eligibility criteria, and the sources and methods of selection of participants. Describe methods of follow-up                                                                        | 7       |
|                              |         | (b) For matched studies, give matching criteria and number of exposed and unexposed                                                                                                               | 7       |
| Variables                    | 7       | Clearly define all outcomes, exposures, predictors, potential confounders, and effect modifiers. Give diagnostic criteria, if applicable                                                          | 8       |
| Data sources/<br>measurement | 8*      | For each variable of interest, give sources of data and details of methods of assessment (measurement). Describe comparability of assessment methods if there is more than one group              | 9       |
| Bias                         | 9       | Describe any efforts to address potential sources of bias                                                                                                                                         | 10      |
| Study size                   | 10      | Explain how the study size was arrived at                                                                                                                                                         | 7       |
| Quantitative variables       | 11      | Explain how quantitative variables were handled in the analyses. If applicable, describe which groupings were chosen and why                                                                      | 9       |
| Statistical methods          | 12      | (a) Describe all statistical methods, including those used to control for confounding                                                                                                             | 9       |
|                              |         | (b) Describe any methods used to examine subgroups and interactions                                                                                                                               | 10      |
|                              |         | (c) Explain how missing data were addressed                                                                                                                                                       | 9       |
|                              |         | (d) If applicable, explain how loss to follow-up was addressed                                                                                                                                    | 9       |
|                              |         | (e) Describe any sensitivity analyses                                                                                                                                                             | N/A     |
| <b>Results</b>               |         |                                                                                                                                                                                                   |         |
| Participants                 | 13*     | (a) Report numbers of individuals at each stage of study—eg numbers potentially eligible, examined for eligibility, confirmed eligible, included in the study, completing follow-up, and analysed | 7       |
|                              |         | (b) Give reasons for non-participation at each stage                                                                                                                                              | 7       |
|                              |         | (c) Consider use of a flow diagram                                                                                                                                                                | 7       |
| Descriptive data             | 14*     | (a) Give characteristics of study participants (eg demographic, clinical, social) and information on exposures and potential confounders                                                          | 10      |
|                              |         | (b) Indicate number of participants with missing data for each variable of interest                                                                                                               | 10      |
|                              |         | (c) Summarise follow-up time (eg, average and total amount)                                                                                                                                       | 10      |
| Outcome data                 | 15*     | Report numbers of outcome events or summary measures over time                                                                                                                                    | 11      |

|    |                          |    |                                                                                                                                                                                                              |       |
|----|--------------------------|----|--------------------------------------------------------------------------------------------------------------------------------------------------------------------------------------------------------------|-------|
| 1  | Main results             | 16 | (a) Give unadjusted estimates and, if applicable, confounder-adjusted estimates and their precision (eg, 95% confidence interval). Make clear which confounders were adjusted for and why they were included | 11    |
| 2  |                          |    | (b) Report category boundaries when continuous variables were categorized                                                                                                                                    | 11    |
| 3  |                          |    | (c) If relevant, consider translating estimates of relative risk into absolute risk for a meaningful time period                                                                                             | 11    |
| 4  |                          |    |                                                                                                                                                                                                              |       |
| 5  | Other analyses           | 17 | Report other analyses done—eg analyses of subgroups and interactions, and sensitivity analyses                                                                                                               | 12    |
| 6  |                          |    |                                                                                                                                                                                                              |       |
| 7  |                          |    |                                                                                                                                                                                                              |       |
| 8  |                          |    |                                                                                                                                                                                                              |       |
| 9  |                          |    |                                                                                                                                                                                                              |       |
| 10 |                          |    |                                                                                                                                                                                                              |       |
| 11 |                          |    |                                                                                                                                                                                                              |       |
| 12 | <b>Discussion</b>        |    |                                                                                                                                                                                                              |       |
| 13 | Key results              | 18 | Summarise key results with reference to study objectives                                                                                                                                                     | 12    |
| 14 | Limitations              | 19 | Discuss limitations of the study, taking into account sources of potential bias or imprecision. Discuss both direction and magnitude of any potential bias                                                   | 15    |
| 15 |                          |    |                                                                                                                                                                                                              |       |
| 16 | Interpretation           | 20 | Give a cautious overall interpretation of results considering objectives, limitations, multiplicity of analyses, results from similar studies, and other relevant evidence                                   | 13-14 |
| 17 |                          |    |                                                                                                                                                                                                              |       |
| 18 | Generalisability         | 21 | Discuss the generalisability (external validity) of the study results                                                                                                                                        | 13-14 |
| 19 |                          |    |                                                                                                                                                                                                              |       |
| 20 |                          |    |                                                                                                                                                                                                              |       |
| 21 |                          |    |                                                                                                                                                                                                              |       |
| 22 | <b>Other information</b> |    |                                                                                                                                                                                                              |       |
| 23 | Funding                  | 22 | Give the source of funding and the role of the funders for the present study and, if applicable, for the original study on which the present article is based                                                | 17    |
| 24 |                          |    |                                                                                                                                                                                                              |       |
| 25 |                          |    |                                                                                                                                                                                                              |       |

\*Give information separately for exposed and unexposed groups.

**Note:** An Explanation and Elaboration article discusses each checklist item and gives methodological background and published examples of transparent reporting. The STROBE checklist is best used in conjunction with this article (freely available on the Web sites of PLoS Medicine at <http://www.plosmedicine.org/>, Annals of Internal Medicine at <http://www.annals.org/>, and Epidemiology at <http://www.epidem.com/>). Information on the STROBE Initiative is available at <http://www.strobe-statement.org>.

# BMJ Open

## Changes of Demographics, Clinical Practices, and Long-term Outcomes of Patients with ST-segment-elevation Myocardial Infarction who Underwent Coronary Revascularization in the Past Two Decades: Cohort Study

|                               |                                                                                                                                                                                                                                                                                                                                                                                                                                                                                                                                                                                                                                                                                                                                                                                                                                                                                                                                                                                                                                                                                                                                                                                                                                                                                                                                                                                                                                                                                                                                                                                                                                                                                                                                                                                                                                                                                                                                                                                                                                                                                                                                                                                                                                                                 |
|-------------------------------|-----------------------------------------------------------------------------------------------------------------------------------------------------------------------------------------------------------------------------------------------------------------------------------------------------------------------------------------------------------------------------------------------------------------------------------------------------------------------------------------------------------------------------------------------------------------------------------------------------------------------------------------------------------------------------------------------------------------------------------------------------------------------------------------------------------------------------------------------------------------------------------------------------------------------------------------------------------------------------------------------------------------------------------------------------------------------------------------------------------------------------------------------------------------------------------------------------------------------------------------------------------------------------------------------------------------------------------------------------------------------------------------------------------------------------------------------------------------------------------------------------------------------------------------------------------------------------------------------------------------------------------------------------------------------------------------------------------------------------------------------------------------------------------------------------------------------------------------------------------------------------------------------------------------------------------------------------------------------------------------------------------------------------------------------------------------------------------------------------------------------------------------------------------------------------------------------------------------------------------------------------------------|
| Journal:                      | <i>BMJ Open</i>                                                                                                                                                                                                                                                                                                                                                                                                                                                                                                                                                                                                                                                                                                                                                                                                                                                                                                                                                                                                                                                                                                                                                                                                                                                                                                                                                                                                                                                                                                                                                                                                                                                                                                                                                                                                                                                                                                                                                                                                                                                                                                                                                                                                                                                 |
| Manuscript ID                 | bmjopen-2020-043683.R1                                                                                                                                                                                                                                                                                                                                                                                                                                                                                                                                                                                                                                                                                                                                                                                                                                                                                                                                                                                                                                                                                                                                                                                                                                                                                                                                                                                                                                                                                                                                                                                                                                                                                                                                                                                                                                                                                                                                                                                                                                                                                                                                                                                                                                          |
| Article Type:                 | Original research                                                                                                                                                                                                                                                                                                                                                                                                                                                                                                                                                                                                                                                                                                                                                                                                                                                                                                                                                                                                                                                                                                                                                                                                                                                                                                                                                                                                                                                                                                                                                                                                                                                                                                                                                                                                                                                                                                                                                                                                                                                                                                                                                                                                                                               |
| Date Submitted by the Author: | 28-Jan-2021                                                                                                                                                                                                                                                                                                                                                                                                                                                                                                                                                                                                                                                                                                                                                                                                                                                                                                                                                                                                                                                                                                                                                                                                                                                                                                                                                                                                                                                                                                                                                                                                                                                                                                                                                                                                                                                                                                                                                                                                                                                                                                                                                                                                                                                     |
| Complete List of Authors:     | <p>Takeji, Yasuaki; Kyoto University Graduate School of Medicine Faculty of Medicine<br/>         Shiomi, Hiroki; Kyoto University Graduate School of Medicine Faculty of Medicine, Department of Cardiovascular Medicine<br/>         Morimoto, Takeshi; Hyogo College of Medicine, Clinical Epidemiology<br/>         Yoshikawa, Yusuke; Kyoto University Graduate School of Medicine Faculty of Medicine, Department of Cardiovascular Medicine<br/>         Taniguchi, Ryoji; Hyogo Prefectural Amagasaki General Medical Center, Division of Cardiology<br/>         Mutsumura-Nakano, Yukiko; Kyoto University Graduate School of Medicine Faculty of Medicine<br/>         Yamamoto, Ko; Kyoto University Graduate School of Medicine Faculty of Medicine<br/>         Yamaji, Kyohei; Kokura Memorial Hospital, Division of Cardiology<br/>         Tazaki, Junichi; Kyoto University Graduate School of Medicine Faculty of Medicine, Department of Cardiovascular Medicine<br/>         Kato, Eri; Kyoto University Graduate School of Medicine Faculty of Medicine<br/>         Watanabe, Hirotoishi; Kyoto University Graduate School of Medicine Faculty of Medicine, Department of Cardiovascular Medicine<br/>         Yamamoto, Erika; Kyoto University Graduate School of Medicine Faculty of Medicine<br/>         Yamashita, Yugo; Kyoto University Graduate School of Medicine Faculty of Medicine<br/>         Fuki, Masayuki; Kyoto University Graduate School of Medicine Faculty of Medicine<br/>         Suwa, Satoru; Juntendo Shizuoka Hospital<br/>         Inoko, Moriaki; Kitano Hospital<br/>         Takeda, Teruki; Koto Memorial Hospital<br/>         Shirotani, Manabu; Kinki University School of Medicine Nara Hospital<br/>         Ehara, Natsuhiko; Kobe City Medical Center General Hospital<br/>         Ishii, Katsuhisa; Kansai Denryoku Hospital<br/>         Inada, Tsukasa; Osaka Red Cross Hospital, Cadiology<br/>         Tamura, Toshihiro; Tenri Hospital, Department of Cardiovascular Medicine<br/>         Onodera, Tomoya; Shizuoka City Shizuoka Hospital<br/>         Shinoda, Eiji; Hamamatsu Rosai Hospital<br/>         Yamamoto, Takashi; Shiga University of Medical Science, Department of</p> |

|                                    |                                                                                                                                                                                                                                                                                                                                                                                                                                                                                                                                                                                                                                                                                                                                                                                                                                                                                                                                                                    |
|------------------------------------|--------------------------------------------------------------------------------------------------------------------------------------------------------------------------------------------------------------------------------------------------------------------------------------------------------------------------------------------------------------------------------------------------------------------------------------------------------------------------------------------------------------------------------------------------------------------------------------------------------------------------------------------------------------------------------------------------------------------------------------------------------------------------------------------------------------------------------------------------------------------------------------------------------------------------------------------------------------------|
|                                    | Cardiovascular and Respiratory Medicine<br>Watanabe, Hiroki; Japan Red Cross Wakayama Medical Center,<br>Department of Cardiovascular medicine<br>Yaku, Hidenori; Mitsubishi Kyoto Hospital<br>Nakatsuma, Kenji; Mitsubishi Kyoto Hospital<br>Sakamoto, Hiroki; Shizuoka General Hospital<br>Ando, Kenji; Kokura Memorial Hospital, Division of Cardiology<br>Soga, Yoshiharu; Kokura Memorial Hospital<br>Furukawa, Yutaka; Kobe City Medical Center General Hospital<br>Sato, Yukihiro; Hyogo Prefectural Amagasaki Hospital<br>Nakagawa, Yoshihisa; Shiga University of Medical Science Hospital<br>Kadota, Kazushige; Kurashiki Central Hospital<br>Komiya, Tatsuhiko; Kurashiki Central Hospital<br>Minatoya, Kenji; Kyoto University Graduate School of Medicine Faculty of<br>Medicine, Department of Cardiovascular Surgery<br>Kimura, Takeshi; Kyoto University Graduate School of Medicine Faculty<br>of Medicine, Department of Cardiovascular Medicine |
| <b>Primary Subject<br>Heading</b>: | Cardiovascular medicine                                                                                                                                                                                                                                                                                                                                                                                                                                                                                                                                                                                                                                                                                                                                                                                                                                                                                                                                            |
| Secondary Subject Heading:         | Cardiovascular medicine                                                                                                                                                                                                                                                                                                                                                                                                                                                                                                                                                                                                                                                                                                                                                                                                                                                                                                                                            |
| Keywords:                          | Myocardial infarction < CARDIOLOGY, Coronary intervention <<br>CARDIOLOGY, Coronary heart disease < CARDIOLOGY                                                                                                                                                                                                                                                                                                                                                                                                                                                                                                                                                                                                                                                                                                                                                                                                                                                     |
|                                    |                                                                                                                                                                                                                                                                                                                                                                                                                                                                                                                                                                                                                                                                                                                                                                                                                                                                                                                                                                    |

SCHOLARONE™  
Manuscripts





I, the Submitting Author has the right to grant and does grant on behalf of all authors of the Work (as defined in the below author licence), an exclusive licence and/or a non-exclusive licence for contributions from authors who are: i) UK Crown employees; ii) where BMJ has agreed a CC-BY licence shall apply, and/or iii) in accordance with the terms applicable for US Federal Government officers or employees acting as part of their official duties; on a worldwide, perpetual, irrevocable, royalty-free basis to BMJ Publishing Group Ltd ("BMJ") its licensees and where the relevant Journal is co-owned by BMJ to the co-owners of the Journal, to publish the Work in this journal and any other BMJ products and to exploit all rights, as set out in our [licence](#).

The Submitting Author accepts and understands that any supply made under these terms is made by BMJ to the Submitting Author unless you are acting as an employee on behalf of your employer or a postgraduate student of an affiliated institution which is paying any applicable article publishing charge ("APC") for Open Access articles. Where the Submitting Author wishes to make the Work available on an Open Access basis (and intends to pay the relevant APC), the terms of reuse of such Open Access shall be governed by a Creative Commons licence – details of these licences and which [Creative Commons](#) licence will apply to this Work are set out in our licence referred to above.

Other than as permitted in any relevant BMJ Author's Self Archiving Policies, I confirm this Work has not been accepted for publication elsewhere, is not being considered for publication elsewhere and does not duplicate material already published. I confirm all authors consent to publication of this Work and authorise the granting of this licence.

1  
2  
3  
4  
5  
6  
7  
8  
9  
10  
11  
12  
13  
14  
15  
16  
17  
18  
19  
20  
21  
22  
23  
24  
25  
26  
27  
28  
29  
30  
31  
32  
33  
34  
35  
36  
37  
38  
39  
40  
41  
42  
43  
44  
45  
46  
47  
48  
49  
50  
51  
52  
53  
54  
55  
56  
57  
58  
59  
60

**Title: Changes of Demographics, Clinical Practices, and Long-term Outcomes of Patients with ST-segment-elevation Myocardial Infarction who Underwent Coronary Revascularization in the Past Two Decades: Cohort Study**

**Authors**

Yasuaki Takeji, M.D.<sup>1</sup>, Hiroki Shiomi, M.D.<sup>1</sup>, Takeshi Morimoto, M.D.<sup>2</sup>, Yusuke Yoshikawa, M.D.<sup>1</sup>, Ryoji Taniguchi, M.D.<sup>3</sup>, Yukiko Nakano, M.D.<sup>1</sup>, Ko Yamamoto, M.D.<sup>1</sup>, Kyohei Yamaji, M.D.<sup>4</sup>, Junichi Tazaki, M.D.<sup>1</sup>, Eri Toda Kato, M.D.<sup>1</sup>, Hirotoishi Watanabe, M.D.<sup>1</sup>, Erika Yamamoto, M.D.<sup>1</sup>, Yugo Yamashita, M.D.<sup>1</sup>, Masayuki Fuki, M.D.<sup>1</sup>, Satoru Suwa, M.D.<sup>5</sup>, Moriaki Inoko, M.D.<sup>6</sup>, Teruki Takeda, M.D.<sup>7</sup>, Manabu Shirotani, M.D.<sup>8</sup>, Natsuhiko Ehara, M.D.<sup>9</sup>, Katsuhisa Ishii, M.D.<sup>10</sup>, Tsukasa Inada, M.D.<sup>11</sup>, Toshihiro Tamura, M.D.<sup>12</sup>, Tomoya Onodera, M.D.<sup>13</sup>, Eiji Shinoda, M.D.<sup>14</sup>, Takashi Yamamoto, M.D.<sup>15</sup>, Hiroki Watanabe, M.D.<sup>16</sup>, Hidenori Yaku, M.D.<sup>17</sup>, Kenji Nakatsuma, M.D.<sup>17</sup>, Hiroki Sakamoto, M.D.<sup>18</sup>, Kenji Ando, M.D.<sup>4</sup>, Yoshiharu Soga, M.D.<sup>19</sup>, Yutaka Furukawa, M.D.<sup>9</sup>, Yukihito Sato, M.D.<sup>3</sup>, Yoshihisa Nakagawa, M.D.<sup>15</sup>, Kazushige Kadota, M.D.<sup>20</sup>, Tatsuhiko Komiya, M.D.<sup>21</sup>, Kenji Minatoya, M.D.<sup>22</sup>, Takeshi Kimura, M.D.<sup>1</sup>; the CREDO-Kyoto AMI Registry Wave-1 and the CREDO-Kyoto AMI Registry Wave-2 Investigators.

**Affiliations**

<sup>1</sup>Department of Cardiovascular Medicine, Graduate School of Medicine, Kyoto University, Kyoto, Japan; <sup>2</sup>Department of Clinical Epidemiology, Hyogo College of

1  
2  
3  
4  
5  
6  
7  
8  
9  
10  
11  
12  
13  
14  
15  
16  
17  
18  
19  
20  
21  
22  
23  
24  
25  
26  
27  
28  
29  
30  
31  
32  
33  
34  
35  
36  
37  
38  
39  
40  
41  
42  
43  
44  
45  
46  
47  
48  
49  
50  
51  
52  
53  
54  
55  
56  
57  
58  
59  
60

Medicine, Nishinomiya, Japan; <sup>3</sup>Department of Cardiology, Hyogo Prefectural Amagasaki Hospital, Amagasaki, Japan; <sup>4</sup>Division of Cardiology, Kokura Memorial Hospital, Kitakyushu, Japan; <sup>5</sup>Department of Cardiovascular Medicine, Juntendo University Shizuoka Hospital, Izunokuni, Japan; <sup>6</sup>Cardiovascular Center, The Tazuke Kofukai Medical Research Institute, Kitano Hospital, Osaka, Japan; <sup>7</sup>Department of Cardiology, Koto Memorial Hospital, Higashiomi, Japan; <sup>8</sup>Division of Cardiology, Nara Hospital, Kinki University Faculty of Medicine, Ikoma, Japan; <sup>9</sup>Department of Cardiovascular Medicine, Kobe City Medical Center General Hospital, Kobe, Japan; <sup>10</sup>Department of Cardiovascular Medicine, Kansai Denryoku Hospital, Osaka, Japan; <sup>11</sup>Department of Cardiovascular Medicine, Osaka Red Cross Hospital, Osaka, Japan; <sup>12</sup>Department of Cardiology, Tenri Hospital, Tenri, Japan; <sup>13</sup>Department of Cardiology, Shizuoka City Shizuoka Hospital, Shizuoka, Japan, <sup>14</sup>Department of Cardiovascular Medicine, Hamamatsu Rosai Hospital, Hamamatsu, Japan; <sup>15</sup>Department of Cardiovascular Medicine, Shiga University of Medical Science Hospital, Otsu, Japan; <sup>16</sup>Department of Cardiology, Japanese Red Cross Wakayama Medical Center, Wakayama, Japan; <sup>17</sup>Department of Cardiology, Mitsubishi Kyoto Hospital, Kyoto, Japan; <sup>18</sup>Department of Cardiology, Shizuoka General Hospital, Shizuoka, Japan; <sup>19</sup>Division of Cardiovascular surgery, Kokura Memorial Hospital, Kitakyushu, Japan; <sup>20</sup>Department of Cardiology and <sup>21</sup>Cardiovascular Surgery, Kurashiki Central Hospital, Kurashiki, Japan; <sup>22</sup>Department of Cardiovascular Surgery, Graduate School of Medicine, Kyoto University, Kyoto, Japan

**Correspondence author:** Takeshi Kimura, MD, PhD

1  
2  
3  
4  
5 Department of Cardiovascular Medicine, Kyoto University Graduate School of  
6  
7  
8 Medicine, Kyoto, Japan

9  
10 Address: 54 Shogoin-Kawahara-cho, Sakyo-ku, Kyoto 606-8507 Japan

11  
12 Email: taketaka@kuhp.kyoto-u.ac.jp

13  
14 TEL: +81-75-751-4255; FAX: +81-75-751-3299

15  
16  
17  
18  
19 **Total word count of the manuscript: 3363**  
20  
21  
22  
23  
24  
25  
26  
27  
28  
29  
30  
31  
32  
33  
34  
35  
36  
37  
38  
39  
40  
41  
42  
43  
44  
45  
46  
47  
48  
49  
50  
51  
52  
53  
54  
55  
56  
57  
58  
59  
60

## 1 Abstract

2 **Objectives:** To evaluate changes in demographics, clinical practices, and long-term clinical  
3 outcomes of STEMI patients before and beyond 2010.

4 **Design:** Multicenter retrospective cohort study

5 **Setting:** The Coronary REvascularization Demonstrating Outcome Study in Kyoto (CREDO-  
6 Kyoto) AMI Registries Wave-1 (2005-2007, 26 centers) and Wave-2 (2011-2013, 22  
7 centers).

8 **Participants:** 9001 patients with STEMI who underwent coronary revascularization (Wave-  
9 1: 4278 patients; Wave-2: 4723 patients).

10 **Primary and secondary outcome measures:** The primary outcome was all-cause death at 3  
11 years. The secondary outcomes were cardiovascular death, cardiac death, sudden cardiac  
12 death, non-cardiovascular death, non-cardiac death, myocardial infarction, definite stent  
13 thrombosis, stroke, hospitalization for heart failure, major bleeding, target vessel  
14 revascularization, ischemia-driven target vessel revascularization, any coronary  
15 revascularization, ischemia-driven any coronary revascularization.

16 **Results:** Patients in Wave-2 were older, more often had comorbidities, and more often  
17 presented with cardiogenic shock than those in Wave-1. Patients in Wave-2 had shorter  
18 onset-to-balloon time, door-to-balloon time, and were more frequently implanted drug-  
19 eluting stents, and received guideline-directed medication than those in Wave-1. The  
20 cumulative 3-year incidence of all-cause death was not significantly different between Wave-  
21 1 and Wave-2 (15.5% and 15.7%,  $P=0.77$ ). The adjusted risk for all-cause death in Wave-2  
22 relative to Wave-1 was not significant at 3 years (HR: 0.92, 95%CI: 0.83-1.03,  $P=0.14$ ), but  
23 lower beyond 30 days (HR: 0.86, 95%CI: 0.75–0.98,  $P=0.03$ ). The adjusted risks of Wave-2  
24 relative to Wave-1 were significantly lower for definite stent thrombosis (HR 0.59, 95%CI:

1  
2  
3 1 0.43-0.81, P=0.001), and for any coronary revascularization (HR 0.75, 95%CI: 0.69-0.81,  
4  
5  
6 2 P<0.001), but higher for major bleeding (HR 1.34, 95%CI: 1.20-1.51, P=0.005).

7  
8 3 **Conclusions:** We could not demonstrate improvement in 3-year mortality risk from Wave-1  
9  
10 4 to Wave-2, but we found reduction in mortality risk beyond 30 days. We also found risk  
11  
12 5 reduction for definite stent thrombosis and any coronary revascularization, but increase in the  
13  
14 6 risk for major bleeding from Wave-1 to Wave-2.  
15  
16  
17  
18  
19  
20  
21  
22  
23  
24  
25  
26  
27  
28  
29  
30  
31  
32  
33  
34  
35  
36  
37  
38  
39  
40  
41  
42  
43  
44  
45  
46  
47  
48  
49  
50  
51  
52  
53  
54  
55  
56  
57  
58  
59  
60

For peer review only

## 1 **Strengths and limitations of this study**

2 • Evaluating changes of demographics, clinical practices, and long-term clinical outcomes in

3 STEMI patients enrolled beyond 2010 compared with those enrolled before 2010.

4 • Multicenter registry with large sample size enrolled consecutive patients who underwent  
5 revascularization for AMI

6 • Historical comparison which should result in systematic differences in selection of patients

7 and acquisition of outcomes

8

9

10

## 1 **Introduction**

2 The early mortality of patients with ST-segment-elevation myocardial infarction (STEMI)  
3 has been steadily declining over the last several decades.<sup>1-5</sup> This trend appeared to have been  
4 driven by many factors, including demographic change, better pharmacologic management,  
5 widespread distribution of thrombolysis and/or primary percutaneous coronary intervention  
6 (PCI), shorter door-to-balloon time, and improvement in secondary prevention.<sup>4, 6-10</sup> Several  
7 large studies had demonstrated improvement of early mortality for patients with STEMI from  
8 1990s to 2000s.<sup>1-3, 10</sup> Treatment based on the updated guidelines might have further improved  
9 the clinical outcomes of STEMI patients beyond 2000s.<sup>11, 12</sup> It is currently unknown whether  
10 the changes in the guidelines have contributed to change real-world clinical practice and to  
11 improve clinical outcomes; in particular, there is a scarcity of data evaluating the long-term  
12 clinical outcomes in STEMI patients enrolled beyond 2010 compared with those enrolled  
13 before 2010, when the new-generation DES was approved in Japan.<sup>10, 13-15</sup> Therefore, we  
14 sought to evaluate changes in demographics, clinical practices, and long-term clinical  
15 outcomes of STEMI patients using data from 2 large Japanese cohorts of patients with acute  
16 myocardial infarction (AMI) enrolled in 2005-2007 and 2011-2013.

## 17 **Methods**

### 18 **Study Population**

19 The Coronary REvascularization Demonstrating Outcome Study in Kyoto (CREDO-  
20 Kyoto) AMI Registries Wave-1 and Wave-2 are a series of physician-initiated, non-company  
21 sponsored, multi-center registry enrolling consecutive patients with AMI who underwent  
22 coronary revascularization, either PCI or isolated coronary artery bypass grafting (CABG),  
23 within seven days of the onset of symptoms. Wave-1 enrolled patients between January 2005  
24 and December 2007 among 26 centers (both PCI and CABG available: 20 centers, and only  
25 PCI available: 6 centers) in Japan after the introduction of drug-eluting stents (DES) in 2004  
26



1 (supplementary appendix A).<sup>16</sup> Wave-2 enrolled patients between January 2011 and  
2 December 2013 among 22 centers (both PCI and CABG available: 16 centers, and only PCI  
3 available: 6 centers) in Japan after approval of the new-generation DES in 2010  
4 (supplementary appendix A). We made a historical comparison on demographics, clinical  
5 practices, and long-term clinical outcomes of STEMI patients between Wave-1 and Wave-2.

6 We enrolled a total of 11899 consecutive AMI patients who had undergone  
7 coronary revascularization with PCI or isolated CABG from Wave-1 (N=5429) and Wave-2  
8 (N=6470). In the present study, we excluded patients with refusal for study participation  
9 (Wave-1: N=9, and Wave-2: N=21), and non-ST-segment elevation myocardial infarction  
10 (NSTEMI) (Wave-1: N=875, and Wave-2: N=1720). To make Wave-1 and Wave-2  
11 comparable, we further excluded 267 patients in Wave-1 who were enrolled from 4  
12 cardiology divisions and 5 cardiovascular surgery divisions not participating in Wave-2 and 6  
13 patients in Wave-2 who were enrolled from 1 cardiovascular surgery division not  
14 participating in Wave-1. Finally, we retrieved 9001 patients with STEMI for the current study  
15 (Wave-1: 4278 patients and Wave-2: 4723 patients) from 22 centers (both PCI and CABG  
16 available: 15 centers, and only PCI available: 7 centers) (Figure 1).

17 The relevant institutional review boards at all participating hospitals approved the  
18 study protocols, and we performed the study in accordance with the Declaration of Helsinki.  
19 Written informed consent for both registries were waived because of the retrospective nature  
20 of the study; however, we excluded those patients who refused participation in the study  
21 when contacted at follow-up. This strategy is concordant with the guidelines of the Japanese  
22 Ministry of Health, Labor and Welfare.

## 24 **Definitions and Clinical Outcome Measures**

1  
2  
3 1 STEMI patients were defined by the electrocardiograms as patients with  $\geq 0.1$  mV  
4  
5 2 of ST-segment elevation in  $\geq 2$  limb leads or  $\geq 0.2$  mV in  $\geq 2$  contiguous precordial leads,  
6  
7 3 accompanied by chest pain lasting at least 30 minutes or increased serum levels of cardiac  
8  
9 4 biomarkers such as troponin and/or creatine kinase MB fraction. Experienced clinical  
10  
11 5 research coordinators from the independent clinical research organization (Research Institute  
12  
13 6 for Production Development, Kyoto, Japan; Supplementary Appendix B) collected baseline  
14  
15 7 clinical, angiographic and procedural characteristics from the hospital charts or hospital  
16  
17 8 databases according to the pre-specified definitions that were identical in Wave-1 and Wave-  
18  
19 9 2.  
20  
21  
22  
23

24 10 Diabetes was defined as treatment with oral hypoglycemic agents or insulin, prior  
25  
26 11 clinical diagnosis of diabetes, glycated hemoglobin level  $\geq 6.5$  %, or non-fasting blood  
27  
28 12 glucose level  $\geq 200$  mg/dL. Left ventricular ejection fraction was measured either by contrast  
29  
30 13 left ventriculography or echocardiography. Prior stroke was defined as ischemic or  
31  
32 14 hemorrhagic stroke with neurological symptoms lasting  $> 24$  hours. Peripheral vascular  
33  
34 15 disease was regarded as present when carotid, aortic, or other peripheral vascular diseases  
35  
36 16 were being treated or scheduled for surgical or endovascular interventions. Renal function  
37  
38 17 was expressed as estimated glomerular filtration rate (eGFR) calculated by the Modification  
39  
40 18 of Diet in Renal Disease formula modified for Japanese patients.<sup>17</sup> High-intensity statins  
41  
42 19 therapy in this study was defined as the statin doses greater than or equal to atorvastatin 20  
43  
44 20 mg, pitavastatin 4 mg, or rosuvastatin 10 mg.  
45  
46  
47  
48

49 21 The primary outcome measure of this study was all-cause death at 3 years. The  
50  
51 22 secondary outcome measures included cardiovascular death, cardiac death, sudden cardiac  
52  
53 23 death, non-cardiovascular death, non-cardiac death, myocardial infarction, definite stent  
54  
55 24 thrombosis, stroke, hospitalization for heart failure, major bleeding, target vessel  
56  
57 25 revascularization, ischemia-driven target vessel revascularization, any coronary  
58  
59  
60

1 revascularization and ischemia-driven any coronary revascularization. Death was regarded as  
2 cardiac in origin unless obvious non-cardiac causes could be identified. Cardiovascular death  
3 included cardiac death, and other vascular death related to stroke, renal disease, and vascular  
4 disease. Any death during the index hospitalization and death of unknown cause were  
5 regarded as cardiac death. Sudden death was defined as unexplained death in previously  
6 stable patients. Myocardial infarction was defined according to the definition in the Arterial  
7 Revascularization Therapy Study (ARTS)<sup>18</sup>, and only Q-wave myocardial infarction was  
8 regarded as myocardial infarction when it occurred within 7 days of the index procedure.<sup>19</sup>  
9 Definite stent thrombosis was defined according to the Academic Research Consortium  
10 (ARC) definition.<sup>20</sup> Stroke during follow up was defined as ischemic or hemorrhagic stroke  
11 requiring hospitalization with symptoms lasting >24 hours. Hospitalization for heart failure  
12 was defined as hospitalization due to worsening heart failure requiring intravenous drug  
13 therapy. Major bleeding was defined as the global utilization of streptokinase and tissue  
14 plasminogen activator for occluded coronary arteries (GUSTO) moderate/severe bleeding.<sup>19</sup>  
15 <sup>21</sup> TVR was defined as either PCI or CABG related to the original target vessel. Any coronary  
16 revascularization was defined as either PCI or CABG for any reason. Scheduled staged  
17 coronary revascularization procedures performed within 3 months of the initial procedure  
18 were not regarded as follow-up events, but included in the index procedure. Duration of dual  
19 antiplatelet therapy (DAPT) was left to the discretion of each attending physician. Persistent  
20 discontinuation of DAPT was defined as withdrawal of either thienopyridines or aspirin for at  
21 least 2 months.

### 22 23 **Data Collection and Follow-up**

24 Collection of follow-up information was mainly conducted through review of the  
25 hospital charts by the clinical research coordinators, and additional follow-up information

1  
2  
3 1 was collected through contact with patients, relatives and/or referring physicians by sending  
4  
5 2 mail with questions regarding vital status, subsequent hospitalizations, and status of  
6  
7 3 antiplatelet therapy.  
8  
9

10 4 Follow-up was censored at 3 years after the index procedure to ensure >90% of  
11  
12 5 clinical follow-up rate in both Wave-1 and Wave-2. Complete 3-year follow-up information  
13  
14 6 was obtained for 96.2% of patients in Wave-1, and 93.2% of patients in Wave-2,  
15  
16 7 respectively. The clinical event committee adjudicated those endpoint events including death,  
17  
18 8 myocardial infarction, stroke and major bleeding (Supplementary Appendix C).  
19  
20  
21  
22 9

## 23 24 10 **Statistical Analysis**

25  
26 11 Continuous variables were expressed as mean  $\pm$  standard deviation (SD) or median  
27  
28 12 with interquartile range (IQR). Continuous variables were compared using the Student's t-test  
29  
30 13 or Wilcoxon rank sum test based on their distributions. Categorical variables are expressed as  
31  
32 14 frequencies and percentages and were compared using  $\chi^2$  test. To calculate the survival  
33  
34 15 functions, follow-up periods were separately calculated for each outcome with censoring due  
35  
36 16 to death or the last visit. The non-fatal outcomes other than the analyzed outcomes in the  
37  
38 17 survival analyses were ignored. Cumulative incidence was estimated by the Kaplan-Meier  
39  
40 18 method and differences were assessed with the log-rank test. To estimate the adjusted hazard  
41  
42 19 ratio (HR) and their 95% confidence intervals (CI) of Wave-2 compared to Wave-1, we used  
43  
44 20 multivariable Cox proportional hazard models by incorporating the 17 clinically relevant  
45  
46 21 factors listed in Table 1. The risk-adjusting variables included demographic factors, but not  
47  
48 22 included the factors related to management during the index hospitalization, because  
49  
50 23 differences in management converged into the changes between Wave-1 and Wave 2.  
51  
52 24 Continuous risk-adjusting variables were dichotomized according to the clinically meaningful  
53  
54 25 reference values to make proportional hazard assumptions robust and to be consistent with  
55  
56  
57  
58  
59  
60

1 previous reports.<sup>22</sup> Proportional hazard assumptions for the risk-adjusting variables were  
2 assessed on the plots of log (time) versus log [-log (survival)] stratified by the variable, and  
3 the assumptions were verified to be acceptable for all variables. The missing values for the  
4 risk-adjusting variables were imputed as “normal” in the binary classification, because data  
5 should have been available if abnormalities were suspected. We performed subgroup analysis  
6 for major bleeding stratified by the Academic Research Consortium High Bleeding Risk  
7 (ARC-HBR) criteria.<sup>23</sup> We conducted a landmark analysis for all-cause death within and  
8 beyond 30 days after the index procedure to distinguish early death related to the index  
9 STEMI event from late death during long-term follow-up. We also conducted a landmark  
10 analysis for major bleeding within and beyond 30 days to distinguish periprocedural bleeding  
11 from non-periprocedural bleeding.

12 All analyses were performed using R version 3.6.1 (R Foundation for Statistical  
13 Computing, Vienna, Austria). All reported P values were two-tailed, and P values less than  
14 0.05 were considered statistically significant.

## 16 **Patient and public involvement**

17 In this study, patients were not involved in the design, or conduct, or reporting, or  
18 dissemination plans of our research

## 20 **Results**

### 21 **Clinical and Procedural Characteristics**

22 Patients in Wave-2 were older and were more often living alone than those in  
23 Wave-1. Patients in Wave-2 more often had diabetes, end-stage renal failure, prior stroke,  
24 peripheral vascular disease, prior PCI, and malignancy, and less often had ejection fraction  
25  $\leq 40\%$ , and current smoking than those in Wave-1 (Table 1).

1  
2  
3 1           Regarding presentation, Wave-2 as compared with Wave-1 included more patients  
4  
5 2   who directly admitted to the participating centers without inter-facility transfer, and who  
6  
7 3   presented with cardiogenic shock and/or Killip class III/IV. Regarding angiographic  
8  
9 4   characteristics, the prevalence of left anterior descending artery culprit was not different  
10  
11 5   between Wave-1 and Wave-2. Patients in Wave-2 more often had multivessel disease than  
12  
13 6   those in Wave-1 (Table 1).

14  
15  
16  
17 7           Regarding procedural characteristics, onset-to-balloon time and door-to-balloon  
18  
19 8   time were significantly shorter in Wave-2 than in Wave-1. Prevalence of transradial approach  
20  
21 9   increased significantly, but only slightly, from Wave-1 to Wave-2. Prevalence of DES use  
22  
23 10   was much higher in Wave-2 than in Wave-1, with new-generation DES use in the vast  
24  
25 11   majority of DES cases in Wave-2 (Table 1). Intra-aortic balloon pumping was more often  
26  
27 12   used in Wave-2 than in in Wave-1 (Table 1).

28  
29  
30  
31 13           In terms of baseline medications, patients in Wave-2 more often took  
32  
33 14   thienopyridine, statins, beta-blockers, angiotensin-converting enzyme inhibitors/angiotensin  
34  
35 15   receptor blockers, and proton pump inhibitors than those in Wave-1, while patients in Wave-  
36  
37 16   2 less often took cilostazol than those in Wave-1. The prevalence of high-intensity statins  
38  
39 17   therapy was very low in both Wave-1 and Wave-2. Regarding the kind of thienopyridine, the  
40  
41 18   vast majority of patients in Wave-1 took ticlopidine, while the vast majority of patients in  
42  
43 19   Wave-2 took clopidogrel (Table 1).

## 44 45 46 47 48 49 21 **Clinical Outcomes**

50  
51 22           The cumulative 3-year incidence of all-cause death was not significantly different  
52  
53 23   between Wave-1 and Wave-2 (15.5% versus 15.7%, log-rank  $P=0.77$ ) (Table 2, and Figure  
54  
55 24   2A). The adjusted risk of Wave-2 relative to Wave-1 remained insignificant for all-cause  
56  
57 25   death (HR: 0.92, 95%CI: 0.83–1.03,  $P=0.14$ ) (Table 2). In the 30-day landmark analysis,

1 cumulative incidence of all-cause death was not significantly different between Wave-1 and  
2 Wave-2 both within 30 days (5.5% versus 5.9%, log-rank  $P=0.37$ ), and beyond 30 days  
3 (10.6% versus 10.4%, log-rank  $P=0.74$ ). However, after adjusting confounders, the lower  
4 mortality risk of Wave-2 relative to Wave-1 was significant beyond 30 days after index  
5 procedure (HR: 0.86, 95%CI: 0.75–0.98,  $P=0.03$ ), although it was not significant within 30  
6 days (HR: 1.04, 95%CI: 0.87–1.23,  $P=0.69$ ) (Supplementary figure 1). The results of the 30-  
7 day landmark analysis were consistent in patients with and without cardiogenic shock  
8 (Supplementary figure I).

9 The lower crude and adjusted risks of Wave-2 relative to Wave-1 were significant  
10 for definite stent thrombosis and any coronary revascularization, while those were  
11 insignificant for cardiovascular death, myocardial infarction, and stroke (Table 2, Figure 2B,  
12 Figure 3).

13 Meanwhile, the cumulative 3-year incidence of major bleeding was significantly  
14 higher in Wave-2 than in Wave-1 (16.5% and 12.0%, log-rank  $P<0.001$ ) (Table 2, and Figure  
15 3). The excess adjusted risk of Wave-2 relative to Wave-1 remained significant for major  
16 bleeding (HR: 1.34, 95%CI: 1.20–1.51,  $P=0.005$ ) (Table 2). In the 30-day landmark analysis,  
17 the excess crude and adjusted risks of Wave-2 relative to Wave-1 for major bleeding were  
18 significant both within 30 days and beyond 30 days (Supplementary figure II). In the  
19 subgroup analysis, the higher risk of Wave-2 relative to Wave-1 for major bleeding was  
20 consistent in patients with and without ARC-HBR (Supplementary figure III). The  
21 cumulative incidence of persistent DAPT discontinuation was significantly lower in Wave-2  
22 than in Wave-1, indicating significantly longer DAPT duration in Wave-2 than in Wave-1  
23 (Supplementary figure IV).

## 24 25 **Discussion**



1  
2  
3 1 The main findings of this study were as follows; 1) Regarding demographics,  
4  
5 2 STEMI patients in Wave-2 were older, more often had comorbidities, and more often  
6  
7 3 presented with serious hemodynamic conditions than those in Wave-1; 2) Regarding clinical  
8  
9 4 practice, patients in Wave-2 had shorter onset-to-balloon time and door-to-balloon time, were  
10  
11 5 more frequently treated with DES, and more often received guideline-directed medical  
12  
13 6 therapy at baseline, and longer duration of DAPT during follow-up than those in Wave-1; 3)  
14  
15 7 The 3-year adjusted risks of patients in Wave-2 relative to those in Wave-1 were not  
16  
17 8 significantly different for all-cause death, myocardial infarction, and stroke, and significantly  
18  
19 9 lower for definite stent thrombosis and any coronary revascularization, but significantly  
20  
21 10 higher for major bleeding; 4) We witnessed a lower adjusted mortality risk of Wave-2  
22  
23 11 relative to Wave-1 beyond 30 days, but not within 30 days.

24  
25  
26  
27  
28 12 There was scarce of data evaluating demographics, clinical practices, and long-term  
29  
30 13 clinical outcomes in STEMI patients enrolled beyond 2010 compared with those enrolled  
31  
32 14 before 2010.<sup>10, 24</sup> In the present study, we could not demonstrate significant improvement in  
33  
34 15 mortality risk from Wave-1 to Wave-2. The mortality rates at 30 days were still around 5-6%  
35  
36 16 in both Wave-1 and Wave-2, which was in line with the previous studies.<sup>25, 26</sup> It was true that  
37  
38 17 patients in Wave-2 were older and sicker than those in Wave-1. However, even the adjusted  
39  
40 18 analysis did not suggest improvement in 30-day mortality risk from Wave-1 to Wave-2. We  
41  
42 19 did observe significantly shorter onset-to-balloon time and door-to-balloon time with less  
43  
44 20 frequent inter-facility transfer, and more frequent use of DES in Wave-2 than in Wave-1.  
45  
46 21 However, these changes in clinical practice did not lead to improvement in 30-day mortality  
47  
48 22 rate. Further shortening of onset-to-balloon time, more widespread use of transradial  
49  
50 23 approach, and improved management of cardiogenic shock might be important to improve  
51  
52 24 30-day mortality rate.<sup>16, 27-34</sup>



1  
2  
3 1 On the other hand, beyond 30 days after the index procedure, we found a  
4  
5 2 significantly lower adjusted mortality risk of patients in Wave-2 relative to those in Wave-1.  
6  
7 3 The changes in clinical practices that might have contributed to lower mortality risk in Wave-  
8  
9 4 2 relative to Wave-1 included shorter onset-to-balloon time, introduction of new-generation  
10  
11 5 DES, and higher prevalence of guideline-directed medications use, particularly statins.  
12  
13 6 Indeed, in the present study, the rates of definite stent thrombosis and any coronary  
14  
15 7 revascularization were significantly lower in Wave-2 than in Wave-1, which was in line with  
16  
17 8 the previous study comparing new-generation DES with first-generation DES.<sup>35</sup> Moreover,  
18  
19 9 we did find substantial increase in the prevalence of statins use. Nevertheless, the prescription  
20  
21 10 rate of high-intensity statin therapy was extremely low in both Wave-1 and Wave-2. The  
22  
23 11 efficacy of high-intensity statin therapy has been firmly established in preventing  
24  
25 12 cardiovascular events in patients with coronary artery disease.<sup>36 37</sup> We should make every  
26  
27 13 effort to promote wider penetration of high-intensity statins therapy in Japan.  
28  
29  
30  
31  
32

33 14 Meanwhile, we have demonstrated that the cumulative 3-year incidence of major  
34  
35 15 bleeding was significantly higher in Wave-2 than in Wave-1. Patients in Wave-2 were older  
36  
37 16 and sicker than those in Wave-1. However, even after adjusting confounders, the excess risk  
38  
39 17 of Wave-2 relative to Wave-1 remained significant for major bleeding. Moreover, the excess  
40  
41 18 bleeding risk of Wave-2 relative to Wave-1 was significant regardless of ARC-HBR.  
42  
43 19 Furthermore, the excess bleeding risk of Wave-2 relative to Wave-1 was significant both  
44  
45 20 within 30 days and beyond 30 days. One of the reasons for the higher bleeding risk within 30  
46  
47 21 days in Wave-2 than in Wave-1 might be the different types of thienopyridine used in Wave-  
48  
49 22 1 and Wave-2. In Wave-1, the vast majority of patients took ticlopidine 100 mg twice daily as  
50  
51 23 the standard dose in Japan, which was much lower than the dose used globally (250 mg twice  
52  
53 24 daily), while in Wave-2, the vast majority of patients took clopidogrel 75 mg once daily,  
54  
55 25 which was the the dose used globally. The 30-day rate of major bleeding in Wave-2 was  
56  
57  
58  
59  
60

1  
2  
3 1 substantial (Entire cohort: 9.8%, ARC-HBR: 14.8%, and non-ARC-HBR: 5.4%), warranting  
4  
5 2 to explore the optimal antiplatelet regimen in STEMI patients minimizing bleeding events  
6  
7 3 while maintaining efficacy in preventing thrombotic events. For the higher bleeding risk  
8  
9 4 beyond 30 days in Wave-2 than in Wave-1, one of the reasons in addition to the difference in  
10  
11 5 the types of thienopyridine might be the longer DAPT duration in Wave-2 than in Wave-1.  
12  
13 6 Recent studies have suggested clinical benefit with very short DAPT after PCI in reducing  
14  
15 7 major bleeding without increase in cardiovascular events, although STEMI patients  
16  
17 8 constituted only a small proportion in the STOPDAPT-2 (ShorT and OPTimal duration of  
18  
19 9 Dual AntiPlatelet Therapy after everolimus-eluting cobalt-chromium stent-2) trial, and were  
20  
21 10 excluded in the TWILIGHT (Ticagrelor with Aspirin or Alone in High-Risk Patients after  
22  
23 11 Coronary Intervention) trial.<sup>38 39</sup> We should continue to pursue the optimal DAPT duration  
24  
25 12 and optimal maintenance antithrombotic regimen in STEMI patients. Our study was based on  
26  
27 13 the multicenter registry with large sample size enrolled consecutive patients who underwent  
28  
29 14 revascularization for AMI and the follow-up rate was high enough. Therefore, we believe our  
30  
31 15 findings should be applicable in Japan or other similar settings outside Japan, but the changes  
32  
33 16 in clinical pictures of STEMI should be investigated in other settings with different  
34  
35 17 healthcare systems.  
36  
37  
38  
39  
40  
41  
42  
43  
44  
45  
46  
47  
48  
49  
50  
51  
52  
53  
54  
55  
56  
57  
58  
59  
60

18

## 19 **Limitations**

20 There are several limitations of this study. First, historical comparison should result in  
21 systematic differences in selection of patients and acquisition of outcomes, although we were  
22 careful in using data only from those centers that participated in both Wave-1 and Wave-2,  
23 standardizing the follow-up duration at 3 years, and adopting the identical methodology for  
24 baseline and follow-up data collection, and definitions of baseline characteristics and clinical

1 outcome measures in Wave-1 and Wave-2. It is noteworthy that cumulative incidence of  
2 myocardial infarction was numerically higher in Wave-2 than in Wave-1, despite  
3 significantly lower incidence of definite stent thrombosis in Wave-2 than in Wave-1. We  
4 could not deny the possibility of ascertainment bias for myocardial infarction, although we  
5 adopted the identical definition of myocardial infarction in Wave-1 and Wave-2. The less  
6 widespread use of troponin for the diagnosis of myocardial infarction in Wave-1 compared  
7 with Wave-2 might have underestimated the incidence of myocardial infarction in Wave-1, as  
8 reflected by the fact that there were much larger number of patients with NSTEMI in Wave-2  
9 than in Wave-1. Moreover, we could not deny the possibility of ascertainment bias for major  
10 bleeding, although we adopted the identical definition in Wave-1 and Wave-2. It could be  
11 possible that more major bleeding events were recorded in the hospital charts due to the  
12 growing interest in bleeding events in later time period. Second, we chose several outcomes  
13 as secondary outcomes carrying the risk of multiple comparisons. Third, we only included  
14 patients who underwent coronary revascularization, which might have lead to selection bias.  
15 However, it is quite rare for a STEMI patient not undergoing primary PCI. Finally, there  
16 might be some residual unmeasured confounders, although we made extensive risk  
17 adjustment.

## 19 **Conclusions**

20 We could not demonstrate significant improvement in 3-year mortality risk from Wave-1 to  
21 Wave-2, but we found significant reduction in mortality risk beyond 30 days. There were  
22 significant reduction in the risks for definite stent thrombosis and any coronary  
23 revascularization, but significant increase in the risk for major bleeding from Wave-1 to  
24 Wave-2.

25

1  
2  
3  
4  
5  
6  
7  
8  
9  
10  
11  
12  
13  
14  
15  
16  
17  
18  
19  
20  
21  
22  
23  
24  
25  
26  
27  
28  
29  
30  
31  
32  
33  
34  
35  
36  
37  
38  
39  
40  
41  
42  
43  
44  
45  
46  
47  
48  
49  
50  
51  
52  
53  
54  
55  
56  
57  
58  
59  
60

1

For peer review only

**Contributors:**

T.Kimura conceptualized the CREDO-Kyoto AMI Registry. YT, prepared the original draft of the manuscript. H.Shiomi, TM, T.Kimura reviewed and edited the the original draft of the manuscript. YT, H.Shiomi, Y.Yoshikawa, YMN, K.Yamamoto, K.Yamaji curated data. YT, TM, T.Kimura constructed methodology for this study. YT, TM performed the statistical analysis. H.Shiomi, TM, RT, K.Yamaji, JT, Hirotoishi Watanabe, SS, MI, Teruki Takeda, MS, NE, KI, TI, Toshihiro Tamura, TO, ES, TY, H.Sakamoto, KA, YS, YF, YS, YN, KK, T.Komiya, KM, T.Kimura are investigators of the CREDO-Kyoto AMI Registry. YT, H.Shiomi, YY, YMN, K.Yamamoto, ETK, EY, Y.Yamashita, MF, Hiroki Watanabe, HY, KN assessed and validated events within the CREDO-Kyoto AMI Registry. T.Kimura is the Guarantor.

**Competing interest statement:**

All authors have completed the Unified Competing Interest form and declare: Dr. Shiomi reports personal fees from Abbott Vascular, Boston Scientific, and Daiichi Sankyo. Dr. Morimoto reports lecturer's fees from Bayer, Daiichi Sankyo, Japan Lifeline, Kyocera, Mitsubishi Tanabe, Novartis, and Toray; the manuscript fees from Bristol-Myers Squibb and Kowa; served advisory boards for Asahi Kasei, Boston Scientific, Bristol-Myers Squibb, and Sanofi. Dr. Kato reports grant from Ono Pharmaceutical, and reports personal fees from Daiichi Sankyo, AstraZeneca, Bristol-Myers Squibb, Tanabe-Mitsubishi Pharma, Ono Pharmaceutical, MSD KK, Pfizer. Dr. Ehara reports personal fees from Abbott Vascular, Medtronic, Terumo, Bayer, Boston Scientific, Daiichi-Sankyo, Edwards Lifescience, Pfizer, Bristol Myers Squibb, Takeda, Boehringer Ingelheim. Dr. Furukawa reports personal fees from Daiichi Sankyo, Bayer, Sanofi, Kowa, Pfizer, Bristol-Myers Squibb, Otsuka Pharmaceutical, Sumitomo Dainippon Pharma, Takeda and Ono Pharmaceutical. Dr.

1  
2  
3 1 Nakagawa reports grant from Abbott Vascular and Boston Scientific, and reports personal  
4  
5 2 fees from Abbott Vascular, Bayer, Boston Scientific, Bristol-Myers Squibb, Daiichi Sankyo.  
6  
7 3 Dr. Kimura reports personal fees from Abbott Vascular, MSD, Eisai, Edwards Lifescience,  
8  
9 4 Ono Pharmaceutical, Tsumura, Medical Review, Kowa, Sanofi, Daiichi Sankyo, Takeda  
10  
11 5 Pharmaceutical, Pharmaceuticals and Medical Devices Agency, Abiomed, Bayer, Bristol-  
12  
13 6 Myers Squibb, Boston Scientific, Lifescience, Toray, Astellas Amgen Biopharma, Astellas,  
14  
15 7 AstraZeneca, Otsuka Pharmaceutical, OrbusNeich, MSD Life Science Foundation, Public  
16  
17 8 Health Research Foundation, Chugai Pharmaceutical, Boehringer Ingelheim, Japan Society  
18  
19 9 for the Promotion of Science, Interscience, Philips, Kowa Pharmaceutical, Mitsubishi Tanabe  
20  
21 10 Pharma, Terumo, Novartis Pharma, Sumitomo Dainippon Pharma.  
22  
23  
24  
25  
26  
27  
28  
29  
30  
31  
32  
33  
34  
35  
36  
37  
38  
39  
40  
41  
42  
43  
44  
45  
46  
47  
48  
49  
50  
51  
52  
53  
54  
55  
56  
57  
58  
59  
60

12 **Funding:**

13 This study was supported by an educational grant from the Research Institute for Production  
14 Development (Kyoto, Japan) and the Pharmaceuticals and Medical Devices Agency (PMDA)  
15 in Japan (Tokyo, Japan). Grant numbers were not applicable.  
16  
17  
18  
19  
20

17 **Data sharing statement:**

18 All data relevant to the study are included in the article or uploaded as supplementary  
19 information.  
20

## 1     **References**

- 2     1.       Fox KA, Steg PG, Eagle KA, et al. Decline in rates of death and heart failure in  
3     acute coronary syndromes, 1999-2006. *JAMA*. 2007;297:1892-900.
- 4     2.       Rogers WJ, Frederick PD, Stoehr E, et al. Trends in presenting characteristics and  
5     hospital mortality among patients with ST elevation and non-ST elevation myocardial  
6     infarction in the National Registry of Myocardial Infarction from 1990 to 2006. *Am Heart J*.  
7     2008;156:1026-34.
- 8     3.       Rosamond WD, Chambless LE, Heiss G, et al. Twenty-two-year trends in incidence  
9     of myocardial infarction, coronary heart disease mortality, and case fatality in 4 US  
10    communities, 1987-2008. *Circulation*. 2012;125:1848-57.
- 11   4.       Yeh RW, Sidney S, Chandra M, et al. Population trends in the incidence and  
12   outcomes of acute myocardial infarction. *N Engl J Med*. 2010;362:2155-65.
- 13   5.       Puymirat E, Simon T, Steg PG, et al. Association of changes in clinical  
14   characteristics and management with improvement in survival among patients with ST-  
15   elevation myocardial infarction. *JAMA*. 2012;308:998-1006.
- 16   6.       Stolt Steiger V, Goy JJ, Stauffer JC, et al. Significant decrease in in-hospital  
17   mortality and major adverse cardiac events in Swiss STEMI patients between 2000 and  
18   December 2007. *Swiss Med Wkly*. 2009;139:453-7.
- 19   7.       Puymirat E, Schiele F, Steg PG, et al. Determinants of improved one-year survival in  
20   non-ST-segment elevation myocardial infarction patients: insights from the French FAST-MI  
21   program over 15 years. *Int J Cardiol*. 2014;177:281-6.
- 22   8.       Jernberg T, Johanson P, Held C, et al. Association between adoption of evidence-  
23   based treatment and survival for patients with ST-elevation myocardial infarction. *JAMA*.  
24   2011;305:1677-84.

- 1  
2  
3 1 9. Gale CP, Allan V, Cattle BA, et al. Trends in hospital treatments, including  
4  
5 2 revascularisation, following acute myocardial infarction, 2003-2010: a multilevel and relative  
6  
7 3 survival analysis for the National Institute for Cardiovascular Outcomes Research (NICOR).  
8  
9 4 *Heart*. 2014;100:582-9.
- 10 5 10. Puymirat E, Simon T, Cayla G, et al. Acute Myocardial Infarction: Changes in  
11  
12 6 Patient Characteristics, Management, and 6-Month Outcomes Over a Period of 20 Years in  
13  
14 7 the FAST-MI Program (French Registry of Acute ST-Elevation or Non-ST-Elevation  
15  
16 8 Myocardial Infarction) 1995 to 2015. *Circulation*. 2017;136:1908-1919.
- 17 9 11. O'Gara PT, Kushner FG, Ascheim DD, et al. 2013 ACCF/AHA guideline for the  
18  
19 10 management of ST-elevation myocardial infarction: executive summary: a report of the  
20  
21 11 American College of Cardiology Foundation/American Heart Association Task Force on  
22  
23 12 Practice Guidelines. *J Am Coll Cardiol*. 2013;61:485-510.
- 24 13 12. Ibanez B, James S, Agewall S, et al. 2017 ESC Guidelines for the management of  
25  
26 14 acute myocardial infarction in patients presenting with ST-segment elevation: The Task  
27  
28 15 Force for the management of acute myocardial infarction in patients presenting with ST-  
29  
30 16 segment elevation of the European Society of Cardiology (ESC). *Eur Heart J*. 2018;39:119-  
31  
32 17 177.
- 33 18 13. Eagle KA, Goodman SG, Avezum A, et al. Practice variation and missed  
34  
35 19 opportunities for reperfusion in ST-segment-elevation myocardial infarction: findings from  
36  
37 20 the Global Registry of Acute Coronary Events (GRACE). *Lancet*. 2002;359:373-7.
- 38 21 14. Fox KA, Goodman SG, Anderson FA, et al. From guidelines to clinical practice: the  
39  
40 22 impact of hospital and geographical characteristics on temporal trends in the management of  
41  
42 23 acute coronary syndromes. The Global Registry of Acute Coronary Events (GRACE). *Eur*  
43  
44 24 *Heart J*. 2003;24:1414-24.



- 1  
2  
3 1 15. Carruthers KF, Dabbous OH, Flather MD, et al. Contemporary management of acute  
4  
5 2 coronary syndromes: does the practice match the evidence? The global registry of acute  
6  
7 3 coronary events (GRACE). *Heart*. 2005;91:290-8.
- 8  
9  
10 4 16. Shiomi H, Nakagawa Y, Morimoto T, et al. Association of onset to balloon and door  
11  
12 5 to balloon time with long term clinical outcome in patients with ST elevation acute  
13  
14 6 myocardial infarction having primary percutaneous coronary intervention: observational  
15  
16 7 study. *BMJ*. 2012;344:e3257.
- 17  
18  
19 8 17. Matsuo S, Imai E, Horio M, et al. Revised equations for estimated GFR from serum  
20  
21 9 creatinine in Japan. *Am J Kidney Dis*. 2009;53:982-92.
- 22  
23  
24 10 18. Serruys PW, Unger F, Sousa JE, et al. Comparison of coronary-artery bypass surgery  
25  
26 11 and stenting for the treatment of multivessel disease. *N Engl J Med*. 2001;344:1117-24.
- 27  
28  
29 12 19. Kimura T, Morimoto T, Furukawa Y, et al. Long-term safety and efficacy of  
30  
31 13 sirolimus-eluting stents versus bare-metal stents in real world clinical practice in Japan.  
32  
33 14 *Cardiovasc Interv Ther*. 2011;26:234-45.
- 34  
35  
36 15 20. Cutlip DE, Windecker S, Mehran R, et al. Clinical end points in coronary stent trials:  
37  
38 16 a case for standardized definitions. *Circulation*. 2007;115:2344-51.
- 39  
40  
41 17 21. An international randomized trial comparing four thrombolytic strategies for acute  
42  
43 18 myocardial infarction. *N Engl J Med*. 1993;329:673-82.
- 44  
45  
46 19 22. Kimura T, Morimoto T, Furukawa Y, et al. Long-term outcomes of coronary-artery  
47  
48 20 bypass graft surgery versus percutaneous coronary intervention for multivessel coronary  
49  
50 21 artery disease in the bare-metal stent era. *Circulation*. 2008;118:S199-209.
- 51  
52  
53 22 23. Urban P, Mehran R, Collieran R, et al. Defining High Bleeding Risk in Patients  
54  
55 23 Undergoing Percutaneous Coronary Intervention. *Circulation*. 2019;140:240-261.
- 56  
57  
58 24 24. Szummer K, Wallentin L, Lindhagen L, et al. Improved outcomes in patients with  
59  
60 25 ST-elevation myocardial infarction during the last 20 years are related to implementation of

- 1  
2  
3 1 evidence-based treatments: experiences from the SWEDEHEART registry 1995-2014. *Eur*  
4  
5 2 *Heart J.* 2017;38:3056-3065.  
6  
7  
8 3 25. Menees DS, Peterson ED, Wang Y, et al. Door-to-balloon time and mortality among  
9  
10 4 patients undergoing primary PCI. *N Engl J Med.* 2013;369:901-9.  
11  
12 5 26. Biswas S, Duffy SJ, Lefkovits J, et al. Australian Trends in Procedural  
13  
14 6 Characteristics and Outcomes in Patients Undergoing Percutaneous Coronary Intervention for  
15  
16 7 ST-Elevation Myocardial Infarction. *Am J Cardiol.* 2018;121:279-288.  
17  
18 8 27. Cannon CP, Gibson CM, Lambrew CT, et al. Relationship of symptom-onset-to-  
19  
20 9 balloon time and door-to-balloon time with mortality in patients undergoing angioplasty for  
21  
22 10 acute myocardial infarction. *JAMA.* 2000;283:2941-7.  
23  
24  
25 11 28. De Luca G, Suryapranata H, Zijlstra F, et al. Symptom-onset-to-balloon time and  
26  
27 12 mortality in patients with acute myocardial infarction treated by primary angioplasty. *J Am*  
28  
29 13 *Coll Cardiol.* 2003;42:991-7.  
30  
31  
32 14 29. McNamara RL, Wang Y, Herrin J, et al. Effect of door-to-balloon time on mortality  
33  
34 15 in patients with ST-segment elevation myocardial infarction. *J Am Coll Cardiol.*  
35  
36 16 2006;47:2180-6.  
37  
38  
39 17 30. Maeng M, Nielsen PH, Busk M, et al. Time to treatment and three-year mortality  
40  
41 18 after primary percutaneous coronary intervention for ST-segment elevation myocardial  
42  
43 19 infarction-a DANish Trial in Acute Myocardial Infarction-2 (DANAMI-2) substudy. *Am J*  
44  
45 20 *Cardiol.* 2010;105:1528-34.  
46  
47  
48 21 31. Rollando D, Puggioni E, Robotti S, et al. Symptom onset-to-balloon time and  
49  
50 22 mortality in the first seven years after STEMI treated with primary percutaneous coronary  
51  
52 23 intervention. *Heart.* 2012;98:1738-42.  
53  
54  
55 24 32. Park J, Choi KH, Lee JM, et al. Prognostic Implications of Door-to-Balloon Time  
56  
57 25 and Onset-to-Door Time on Mortality in Patients With ST -Segment-Elevation Myocardial  
58  
59  
60

- 1  
2  
3 1 Infarction Treated With Primary Percutaneous Coronary Intervention. *J Am Heart Assoc.*  
4  
5 2 2019;8:e012188.  
6  
7 33. Nakatsuma K, Shiomi H, Morimoto T, et al. Inter-Facility Transfer vs. Direct  
8  
9 Admission of Patients With ST-Segment Elevation Acute Myocardial Infarction Undergoing  
10  
11 Primary Percutaneous Coronary Intervention. *Circ J.* 2016;80:1764-72.  
12  
13 5  
14 34. Gandhi S, Kakar R and Overgaard CB. Comparison of radial to femoral PCI in acute  
15  
16 myocardial infarction and cardiogenic shock: a systematic review. *J Thromb Thrombolysis.*  
17  
18 7  
19 8 2015;40:108-17.  
20  
21 35. Toyota T, Shiomi H, Morimoto T, et al. Meta-analysis of long-term clinical  
22  
23 outcomes of everolimus-eluting stents. *Am J Cardiol.* 2015;116:187-94.  
24  
25 10  
26 36. Taguchi I, Iimuro S, Iwata H, et al. High-Dose Versus Low-Dose Pitavastatin in  
27  
28 Japanese Patients With Stable Coronary Artery Disease (REAL-CAD): A Randomized  
29  
30 Superiority Trial. *Circulation.* 2018;137:1997-2009.  
31  
32 13  
33 37. Baigent C, Blackwell L, Emberson J, et al. Efficacy and safety of more intensive  
34  
35 lowering of LDL cholesterol: a meta-analysis of data from 170,000 participants in 26  
36  
37 randomised trials. *Lancet.* 2010;376:1670-81.  
38  
39 16  
40 38. Watanabe H, Domei T, Morimoto T, et al. Effect of 1-Month Dual Antiplatelet  
41  
42 Therapy Followed by Clopidogrel vs 12-Month Dual Antiplatelet Therapy on Cardiovascular  
43  
44 and Bleeding Events in Patients Receiving PCI: The STOPDAPT-2 Randomized Clinical  
45  
46 Trial. *JAMA.* 2019;321:2414-2427.  
47  
48 20  
49 39. Mehran R, Baber U, Sharma SK, et al. Ticagrelor with or without Aspirin in High-  
50  
51 Risk Patients after PCI. *N Engl J Med.* 2019;381:2032-2042.  
52  
53 22  
54 23  
55  
56  
57  
58  
59  
60

1  
2  
3 **1 Footnotes**

4  
5 **2 Acknowledgments:**

6  
7  
8 3 We appreciate the support and collaboration of the coinvestigators participating in the  
9  
10 4 CREDO Kyoto PCI/CABG Registry Wave-1 and the CREDO Kyoto PCI/CABG Registry  
11  
12 5 Wave-2. We are indebted to the outstanding effort of the clinical research coordinators for  
13  
14 6 data collection.

15  
16  
17 **7 Ethical approval:**

18  
19 8 The protocol for CREDO-Kyoto AMI Registry Wave-1 and Wave-2 were approved by the  
20  
21 9 human research ethics committees of the Kyoto University Graduate School of Medicine  
22  
23  
24 10 (E42,E2400).

25  
26 **11 Provenance and peer review:**

27  
28 12 Not commissioned; externally peer reviewed.  
29  
30  
31 13  
32  
33  
34  
35  
36  
37  
38  
39  
40  
41  
42  
43  
44  
45  
46  
47  
48  
49  
50  
51  
52  
53  
54  
55  
56  
57  
58  
59  
60

1  
2  
3 **1 Figure legends**  
4

5  
6 2

7  
8 **3 Figure 1. Study flowchart**  
9

10 4 CREDO-Kyoto=Coronary REvascularization Demonstrating Outcome study in Kyoto;

11  
12 5 AMI=acute myocardial infarction; PCI=percutaneous coronary intervention,  
13

14 6 CABG=coronary artery bypass grafting; NSTEMI=non-ST-segment elevation myocardial  
15

16  
17 7 infarction; STEMI=ST-segment elevation myocardial infarction.  
18

19 8

20  
21 **9 Figure 2. Kaplan-Meier curves (A) for all-cause death and (B) for cardiovascular death**  
22

23  
24 **10 comparing between Wave-1 and Wave-2**  
25

26 11

27  
28 **12 Figure 3. Kaplan-Meier curves comparing between Wave-1 and Wave-2 for (A)**  
29

30 **13 myocardial infarction, (B) definite stent thrombosis, (C) major bleeding, and (D) any**  
31

32 **14 coronary revascularization**  
33

34  
35 15 Definite stent thrombosis was based on the ARC definition, and was analyzed only for  
36

37 16 patients who underwent PCI with stent implantation (3739 patients in Wave-1 and 4241  
38

39 17 patients in Wave-2).  
40

41  
42 18 Major bleeding was defined as GUSTO moderate/severe bleeding.  
43

44  
45 19 CREDO-Kyoto==Coronary REvascularization Demonstrating Outcome study in Kyoto;  
46

47 20 AMI=acute myocardial infarction; STEMI=ST-segment elevation myocardial infarction;  
48

49 21 NSTEMI=non-ST-segment elevation myocardial infarction; ARC=academic research  
50

51 22 consortium; GUSTO=global utilization of streptokinase and tissue plasminogen activator for  
52

53 23 occluded coronary arteries .  
54  
55  
56  
57  
58  
59  
60

1 **Table 1. Baseline characteristics comparing between Wave-1 and Wave-2**

|                                                          | Wave-1<br>(N=4278) | Wave-2<br>(N=4723) | P value |
|----------------------------------------------------------|--------------------|--------------------|---------|
| <b>(A) Clinical characteristics</b>                      |                    |                    |         |
| Age (years)                                              | 67.6 ± 12.2        | 68.8 ± 12.5        | <0.001  |
| Age ≥75 years*                                           | 1336 (31%)         | 1694 (36%)         | <0.001  |
| Men*                                                     | 3156 (74%)         | 3538 (75%)         | 0.23    |
| Body mass index (kg/m <sup>2</sup> )                     | 23.6 ± 3.5         | 23.7 ± 3.6         | 0.40    |
| Body mass index <25.0 kg/m <sup>2</sup> *                | 3058 (72%)         | 3269 (69%)         | 0.02    |
| Hypertension*                                            | 3343 (78%)         | 3768 (80%)         | 0.06    |
| Diabetes mellitus*                                       | 1395 (33%)         | 1664 (35%)         | 0.009   |
| on insulin therapy                                       | 205 (4.8%)         | 270 (5.7%)         | 0.06    |
| Current smoking*                                         | 1730 (40%)         | 1702 (36%)         | <0.001  |
| Heart failure*                                           | 1350 (32%)         | 1566 (33%)         | 0.11    |
| LVEF                                                     | 52.5±12.9          | 53.8±12.4          | <0.001  |
| LVEF ≤40%                                                | 596 (18%)          | 595 (14%)          | <0.001  |
| Prior PCI                                                | 364 (8.5%)         | 523 (11%)          | <0.001  |
| Prior CABG                                               | 53 (1.2%)          | 59 (1.2%)          | 1.00    |
| Prior myocardial infarction*                             | 381 (8.9%)         | 427 (9.0%)         | 0.85    |
| Prior stroke (symptomatic)*                              | 394 (9.2%)         | 521 (11%)          | 0.005   |
| Peripheral vascular disease*                             | 138 (3.2%)         | 209 (4.4%)         | 0.004   |
| eGFR<30mL/min/1.73m <sup>2</sup> , without hemodialysis* | 202 (4.7%)         | 288 (6.1%)         | 0.005   |
| Hemodialysis*                                            | 73 (1.7%)          | 131 (2.8%)         | 0.001   |
| eGFR <30 ml/min/1.73m <sup>2</sup> or hemodialysis       | 275 (6.4%)         | 419 (8.9%)         | <0.001  |
| Atrial fibrillation                                      | 418 (9.8%)         | 419 (8.9%)         | 0.15    |
| Anemia (Hemoglobin <11.0g/dl)*                           | 438 (10%)          | 531 (11%)          | 0.13    |
| Thrombocytopenia (Platelet <100×10 <sup>9</sup> /L)      | 84 (2.0%)          | 102 (2.2%)         | 0.56    |
| Chronic obstructive pulmonary disease                    | 140 (3.3%)         | 173 (3.7%)         | 0.34    |
| Liver cirrhosis                                          | 101 (2.4%)         | 101 (2.1%)         | 0.52    |
| Malignancy*                                              | 337 (7.9%)         | 516 (11%)          | <0.001  |
| <b>(B) Presentation</b>                                  |                    |                    |         |
| Living alone                                             | 509 (13%)          | 780 (17%)          | <0.001  |
| Direct admission                                         | 2215 (54%)         | 2603 (57%)         | 0.02    |
| Inter-facility transfer                                  | 1866 (44%)         | 1983 (42%)         | 0.12    |

|   |                         |                  |                 |        |
|---|-------------------------|------------------|-----------------|--------|
| 1 |                         |                  |                 |        |
| 2 |                         |                  |                 |        |
| 3 |                         |                  |                 |        |
| 4 | Killip class III/IV     | 725 (17%)        | 915 (19%)       | 0.003  |
| 5 | Cardiogenic shock       | 596 (14%)        | 757 (16%)       | 0.005  |
| 6 |                         |                  |                 |        |
| 7 | Cardiopulmonary arrest* | 142 (3.3%)       | 193 (4.1%)      | 0.06   |
| 8 | Maximum CK              | 2133 (1002-4077) | 1836 (767-3663) | <0.001 |
| 9 |                         |                  |                 |        |

### 10 (C) Angiographic characteristics

#### 11 Infarct related artery location:

|    |                                           |            |            |        |
|----|-------------------------------------------|------------|------------|--------|
| 12 |                                           |            |            |        |
| 13 |                                           |            |            |        |
| 14 | Left anterior descending coronary artery* | 1979 (46%) | 2191 (46%) | 0.91   |
| 15 | Left circumflex coronary artery           | 443 (10%)  | 479 (10%)  | 0.76   |
| 16 |                                           |            |            |        |
| 17 | Right coronary artery                     | 1732 (40%) | 1898 (40%) | 0.78   |
| 18 |                                           |            |            |        |
| 19 | Left main coronary artery                 | 107 (2.5%) | 172 (3.6%) | 0.002  |
| 20 |                                           |            |            |        |
| 21 | Coronary artery bypass graft              | 19 (0.4%)  | 24 (0.5%)  | 0.77   |
| 22 | Multivessel disease                       | 2222 (52%) | 2655 (56%) | <0.001 |

### 23 (D) Procedural characteristics

|    |                                          |               |               |        |
|----|------------------------------------------|---------------|---------------|--------|
| 24 |                                          |               |               |        |
| 25 | Onset-to-balloon time (hours)            | 4.2 (2.8-7.2) | 4.0 (2.7-6.6) | <0.001 |
| 26 |                                          |               |               |        |
| 27 | Door-to-balloon time (minutes)           | 90 (60-132)   | 79 (59-110)   | <0.001 |
| 28 |                                          |               |               |        |
| 29 | Intra-aortic balloon pump use            | 738 (17%)     | 994 (21%)     | <0.001 |
| 30 | Percutaneous cardiopulmonary support use | 116 (2.7%)    | 149 (3.2%)    | 0.24   |
| 31 |                                          |               |               |        |
| 32 | PCI*                                     | 4180 (98%)    | 4625 (98%)    | 0.48   |
| 33 |                                          |               |               |        |
| 34 | Transradial approach                     | 498 (12%)     | 733 (16%)     | <0.001 |
| 35 | Transfemoral approach                    | 3432 (82%)    | 3640 (79%)    | <0.001 |
| 36 |                                          |               |               |        |
| 37 | IVUS use for the culprit lesion          | 1260 (30%)    | 2653 (57%)    | <0.001 |
| 38 |                                          |               |               |        |
| 39 | Stent use for the culprit lesion         | 3739 (89%)    | 4241 (92%)    | <0.001 |
| 40 |                                          |               |               |        |
| 41 | Bare metal stent                         | 2946 (79%)    | 1735 (41%)    | <0.001 |
| 42 | Drug-eluting stent                       | 793 (21%)     | 2506 (59%)    | <0.001 |
| 43 |                                          |               |               |        |
| 44 | Staged PCI                               | 932 (22%)     | 1018 (22%)    | 0.77   |
| 45 |                                          |               |               |        |
| 46 | Stent use including staged PCI           | 3802 (91%)    | 4295 (93%)    | 0.001  |
| 47 |                                          |               |               |        |
| 48 | Bare metal stent                         | 2542 (67%)    | 1490 (35%)    | <0.001 |
| 49 | Drug-eluting stent                       | 1260 (33%)    | 2805 (65%)    | <0.001 |
| 50 |                                          |               |               |        |
| 51 | First-generation DES use                 | 1257 (99%)    | 47 (1.7%)     | <0.001 |
| 52 |                                          |               |               |        |
| 53 | Sirolimus-eluting stent (CYPHER™)        | 1174 (93%)    | 27 (57%)      |        |
| 54 | Paclitaxel-eluting stent (TAXUS™)        | 115 (9.1%)    | 21 (45%)      |        |
| 55 |                                          |               |               |        |
| 56 | New-generation DES use                   | -             | 2776 (99%)    |        |
| 57 |                                          |               |               |        |
| 58 | Everolimus-eluting stent (XIENCE™)       | -             | 2054 (74%)    |        |
| 59 | Everolimus-eluting stent (PROMUS™)       | -             | 1616 (58%)    |        |
| 60 |                                          |               |               |        |

|    |                                             |            |            |        |
|----|---------------------------------------------|------------|------------|--------|
|    | Biolimus-eluting stent (NOBORI™)            | -          | 725 (26%)  |        |
|    | Zotarolimus-eluting stent (RESOLUTE™)       | -          | 255 (9.2%) |        |
|    | Zotarolimus-eluting stent (ENDEAVOR™)       | -          | 49 (1.8%)  |        |
| 9  | CABG                                        | 98 (2.3%)  | 98 (2.1%)  | 0.48   |
| 10 | Off pump                                    | 34 (35%)   | 43 (44%)   | 0.19   |
| 12 | ITA use                                     | 82 (84%)   | 80 (82%)   | 0.71   |
| 13 | <b>(E) Baseline Medications</b>             |            |            |        |
| 15 | Antiplatelet therapy                        |            |            |        |
| 17 | Thienopyridine                              | 3993 (93%) | 4521 (96%) | <0.001 |
| 18 | Ticlopidine                                 | 3652 (85%) | 124 (2.6%) | <0.001 |
| 20 | Clopidogrel                                 | 340 (7.9%) | 4339 (92%) | <0.001 |
| 22 | Aspirin                                     | 4209 (98%) | 4636 (98%) | 0.45   |
| 24 | Cilostazol                                  | 1501 (35%) | 116 (2.5%) | <0.001 |
| 25 | Statins                                     | 2281 (53%) | 3885 (82%) | <0.001 |
| 27 | High-intensity statins therapy <sup>§</sup> | 67 (1.6%)  | 78 (1.7%)  | 0.81   |
| 29 | Beta-blockers                               | 1747 (41%) | 2555 (54%) | <0.001 |
| 30 | ACE inhibitors/ARB                          | 3040 (71%) | 3554 (75%) | <0.001 |
| 32 | Nitrates                                    | 1269 (30%) | 832 (18%)  | <0.001 |
| 34 | Calcium channel blockers                    | 885 (21%)  | 970 (21%)  | 0.88   |
| 35 | Nicorandil                                  | 1198 (28%) | 966 (20%)  | <0.001 |
| 37 | Warfarin                                    | 495 (12%)  | 591 (13%)  | 0.18   |
| 38 | DOAC                                        | -          | 61 (1.3%)  | -      |
| 40 | Proton pump inhibitors                      | 1470 (34%) | 3505 (74%) | <0.001 |
| 42 | Histamine type-2 receptor blockers          | 1393 (33%) | 553 (12%)  | <0.001 |

1 Continuous variables were expressed as mean ± standard deviation, or median (interquartile  
2 range). Categorical variables were expressed as number (percentage).

3 There were missing values for body mass index in 341 patients (Wave-1: 232 [5.4%] and  
4 Wave-2: 109 [2.3%]), for LVEF in 1385 patients (Wave-1: 951 [22%] and Wave-2: 434  
5 [9.2%]), for eGFR in 94 patients (Wave-1: 80 [1.9%] and Wave-2: 14 [0.3%]), for  
6 hemoglobin level in 110 patients (Wave-1: 99 [2.3%] and Wave-2: 11 [0.2%]), for platelet  
7 count in 47 patients (Wave-1: 29 [0.7%] and Wave-2: 18 [0.4%]), for max CK in 91 patients  
8 (Wave-1: 39 [0.9%] and Wave-2: 52 [1.1%]). The numbers of missing values for body mass



1 index, eGFR, hemoglobin level, and platelet count were negligibly small. The missing values  
2 for these variables were imputed as “normal” in the binary classification, because data should  
3 have been available if abnormalities were suspected. On the other hands, the missing values  
4 for LVEF were not imputed in the categorical classification, because the numbers of missing  
5 values were substantial for these variables. Onset to balloon time and door to balloon time  
6 were analyzed only for patients who underwent PCI within 24 hours of the onset of  
7 symptoms excluding nosocomial onset (onset to balloon time: 3271 patients in Wave-1 and  
8 3372 patients in Wave-2; door to balloon time: 3228 patients in Wave-1 and 3242 patients in  
9 Wave-2).

10 \*Risk-adjusting variables for the Cox proportional hazard models

11 §High-intensity statins therapy in this study was defined as the statin doses greater than or  
12 equal to atorvastatin 20 mg, pitavastatin 4 mg, or rosuvastatin 10 mg.

13 PCI=percutaneous coronary intervention; CABG=coronary artery bypass grafting;

14 ESRD=end-stage renal disease; eGFR=estimated glomerular filtration rate; ARC-HBR=

15 ARC-HBR=academic research consortium-high bleeding risk; CK=creatinine kinase;

16 ITA=internal thoracic artery; ACE inhibitor/ARB=angiotensin-converting enzyme

17 inhibitor/angiotensin receptor blocker; DOAC=direct oral anticoagulants.

1 **Table 2. Clinical outcomes comparing between Wave-1 and Wave-2**

| Endpoints                                       | Wave-1<br>(N=4278)<br>N of patients with event<br>(Cumulative 3-year incidence) | Wave-2<br>(N=4723)<br>N of patients with event<br>(Cumulative 3-year incidence) | Crude HR<br>(95% CI) | P value | Adjusted HR<br>(95% CI) | P value |
|-------------------------------------------------|---------------------------------------------------------------------------------|---------------------------------------------------------------------------------|----------------------|---------|-------------------------|---------|
| All-cause death                                 | 654 (15.5%)                                                                     | 722 (15.7%)                                                                     | 1.02 (0.91-1.13)     | 0.77    | 0.92 (0.83-1.03)        | 0.14    |
| Cardiovascular death                            | 475 (11.3%)                                                                     | 524 (11.4%)                                                                     | 1.01 (0.89-1.15)     | 0.86    | 0.93 (0.82-1.06)        | 0.26    |
| Cardiac death                                   | 448 (10.7%)                                                                     | 489 (10.7%)                                                                     | 1.00 (0.88-1.14)     | 1.00    | 0.93 (0.81-1.05)        | -       |
| Sudden cardiac death                            | 47 (1.2%)                                                                       | 45 (1.1%)                                                                       | 0.88 (0.59-1.33)     | 0.54    | 0.76 (0.50-1.15)        | -       |
| Non-cardiovascular death                        | 179 (4.7%)                                                                      | 198 (4.8%)                                                                      | 1.03 (0.84-1.26)     | 0.80    | 0.90 (0.73-1.10)        | 0.29    |
| Non-cardiac death                               | 206 (5.4%)                                                                      | 233 (5.7%)                                                                      | 1.05 (0.87-1.27)     | 0.61    | 0.91 (0.75-1.10)        | -       |
| Myocardial infarction                           | 169 (4.3%)                                                                      | 202 (4.8%)                                                                      | 1.10 (0.90-1.35)     | 0.36    | 1.04 (0.85-1.28)        | 0.72    |
| Definite stent thrombosis*                      | 81 (2.3%)                                                                       | 60 (1.5%)                                                                       | 0.65 (0.47-0.91)     | 0.01    | 0.59 (0.43-0.81)        | 0.001   |
| Stroke                                          | 191 (4.9%)                                                                      | 243 (5.7%)                                                                      | 1.17 (0.97-1.42)     | 0.10    | 1.09 (0.90-1.31)        | 0.40    |
| Hospitalization for heart failure               | 267 (7.0%)                                                                      | 305 (7.4%)                                                                      | 1.06 (0.90-1.25)     | 0.50    | 0.97 (0.82-1.14)        | 0.68    |
| Major bleeding                                  | 492 (12.0%)                                                                     | 741 (16.5%)                                                                     | 1.39 (1.25-1.56)     | <0.001  | 1.34 (1.20-1.51)        | 0.005   |
| Target vessel revascularization                 | 1017 (26.3%)                                                                    | 816 (19.5%)                                                                     | 0.70 (0.64-0.77)     | <0.001  | 0.69 (0.63-0.76)        | -       |
| Ischemia-driven target vessel revascularization | 353 (9.1%)                                                                      | 364 (8.7%)                                                                      | 0.94 (0.81-1.09)     | 0.43    | 0.92 (0.79-1.06)        | -       |
| Any coronary revascularization                  | 1277 (33.0%)                                                                    | 1112 (26.6%)                                                                    | 0.76 (0.70-0.83)     | <0.001  | 0.75 (0.69-0.81)        | -       |
| Ischemia-driven any coronary revascularization  | 472 (12.3%)                                                                     | 522 (12.6%)                                                                     | 1.02 (0.90-1.15)     | 0.80    | 0.99 (0.87-1.12)        | -       |

2 The risk of Wave-2 relative to Wave-1 was expressed as HR with 95%CI. The covariates for the multivariate Cox proportional hazard models

3 were indicated in Table 1.

4 Myocardial infarction was based on the ARTS definition.

1  
2  
3 1 \*Definite stent thrombosis was based on the ARC definition, and was analyzed only for patients who underwent PCI with stent implantation

4  
5  
6 2 (3739 patients in Wave-1 and 4241 patients in Wave-2).

7  
8 3 Major bleeding was defined as GUSTO moderate/severe bleeding.

9  
10 4 HR=hazard ratio; CI=confidence interval; ARTS=arterial revascularization therapy study; ARC=academic research consortium; GUSTO=global

11  
12 5 utilization of streptokinase and tissue plasminogen activator for occluded coronary arteries.

13  
14  
15 6

16  
17 7

**CREDO-Kyoto AMI registry Wave-1**  
**5,429 patients with AMI undergoing coronary revascularization with PCI or isolated CABG between 2005 and 2007 from 26 centers**

Refusal for study participation: N=9

Patients with NSTEMI: N=875

**Entire STEMI cohort in Wave-1: N=4,545**

Patients enrolled from centers not participating in Wave-2: N=267

**Current study population in Wave-1 from 22 centers**  
**Patients with STEMI: N=4,278**

Patients who died during 3-year follow-up: N=654

Patients who censored before 3 years: N=170

**Number of patients at risk in Wave-1 at 3 years: N=3,454**

**CREDO-Kyoto AMI Registry Wave-2**  
**6,470 patients with AMI undergoing coronary revascularization with PCI or isolated CABG between 2011 and 2013 from 22 centers**

Refusal for study participation: N=21

Patients with NSTEMI: N=1,720

**Entire STEMI cohort in Wave-2: N=4,729**

Patients enrolled from centers not participating in Wave-1: N=6

**Current study population in Wave-2 from 22 centers**  
**Patients with STEMI : N=4,723**

Patients who died during 3-year follow-up: N=722

Patients who censored before 3 years: N=316

**Number of patients at risk in Wave-2 at 3 years: N=3,685**

1  
2  
3  
4  
5  
6  
7  
8  
9  
10  
11  
12  
13  
14  
15  
16  
17  
18  
19  
20  
21  
22  
23  
24  
25  
26  
27  
28  
29  
30  
31  
32  
33  
34  
35  
36  
37  
38  
39  
40  
41  
42  
43  
44  
45  
46  
47  
48  
49  
50  
51  
52  
53  
54  
55  
56  
57  
58  
59  
60

### (A) All-cause death

### (B) Cardiovascular death

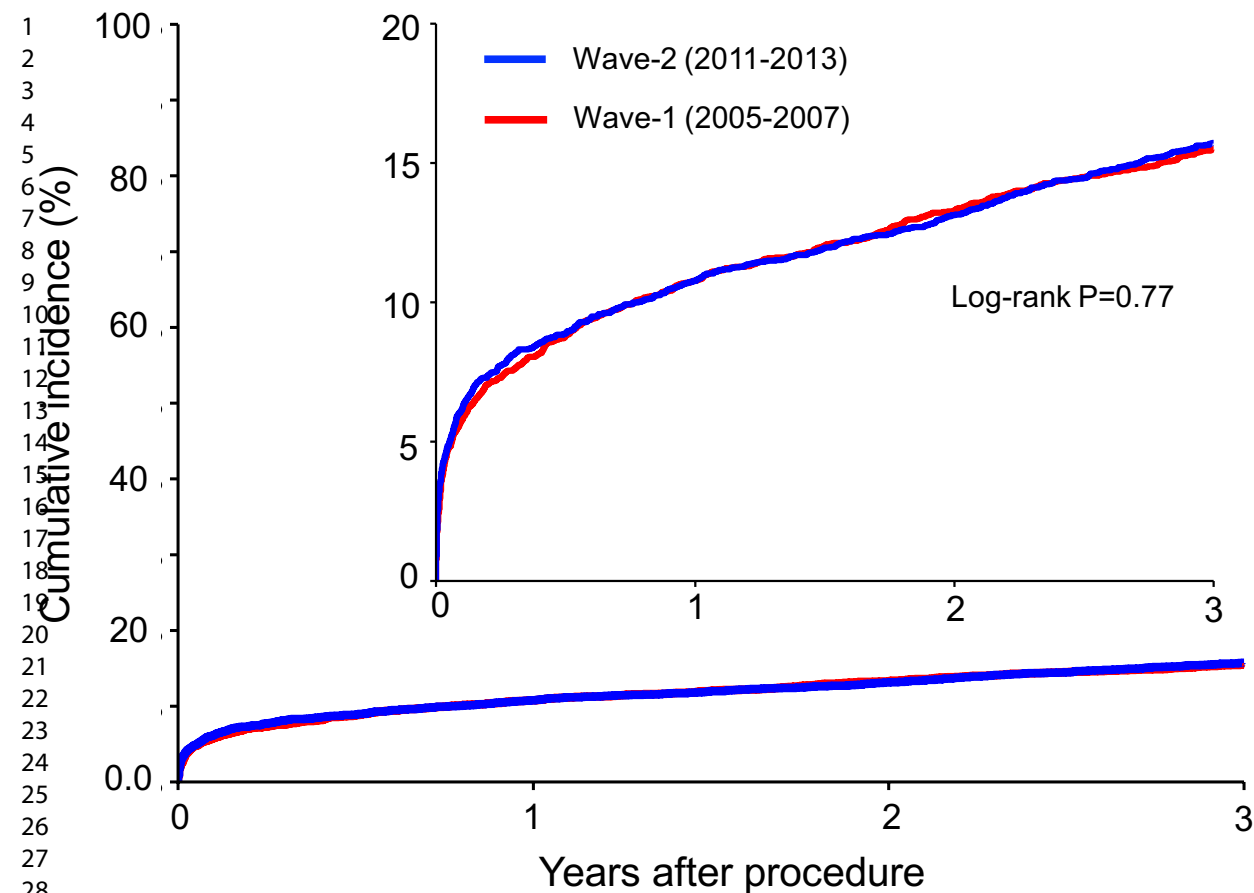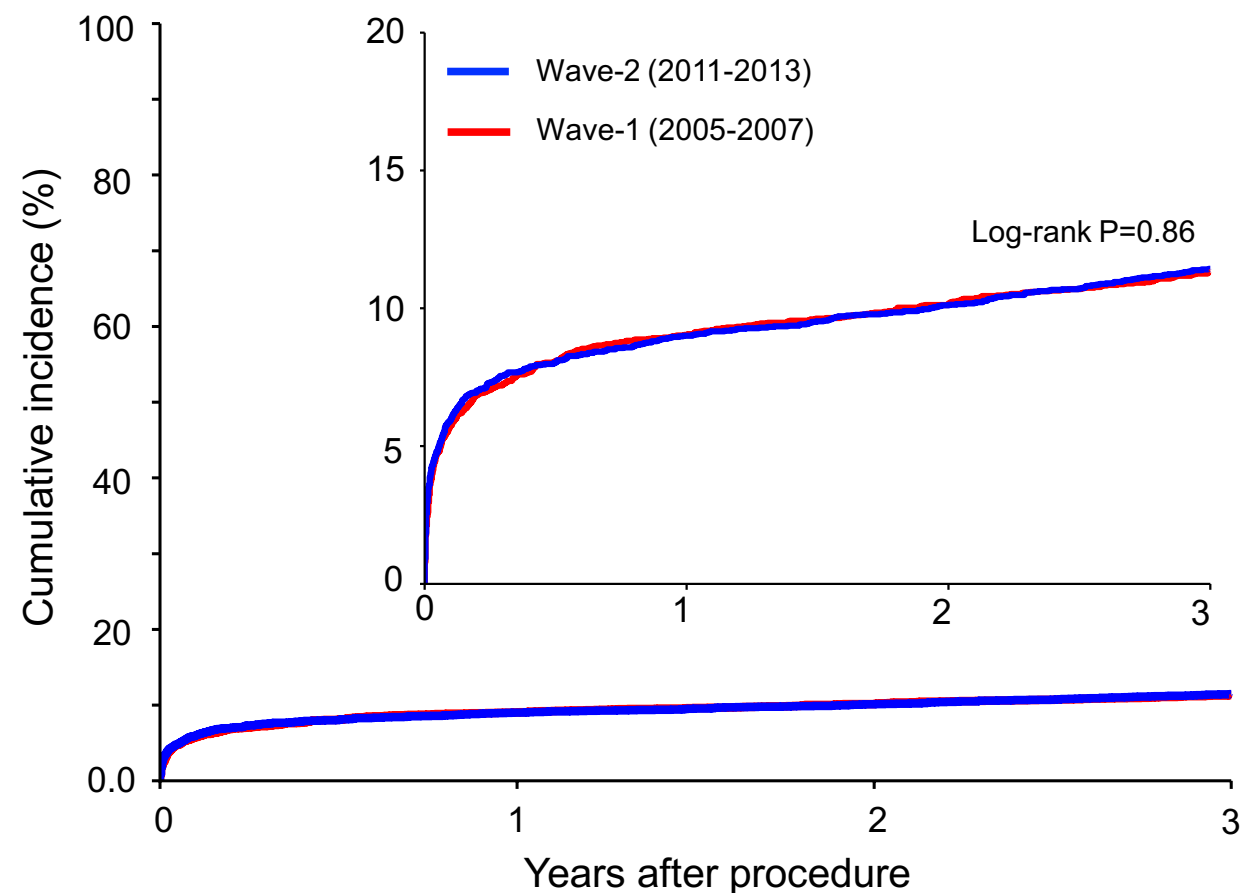

| Interval                 | 0 day | 30 days | 1 year | 2 years | 3 years |
|--------------------------|-------|---------|--------|---------|---------|
| <b>Wave-2</b>            |       |         |        |         |         |
| N of patients at risk    | 4723  | 4395    | 4041   | 3858    | 3685    |
| N of patients with event |       | 280     | 502    | 608     | 722     |
| Cumulative incidence     |       | 5.9%    | 10.8%  | 13.1%   | 15.7%   |
| <b>Wave-1</b>            |       |         |        |         |         |
| N of patients at risk    | 4278  | 4023    | 3744   | 3602    | 3454    |
| N of patients with event |       | 235     | 458    | 564     | 654     |
| Cumulative incidence     |       | 5.5%    | 10.8%  | 13.3%   | 15.5%   |

| Interval                 | 0 day | 30 days | 1 year | 2 years | 3 years |
|--------------------------|-------|---------|--------|---------|---------|
| <b>Wave-2</b>            |       |         |        |         |         |
| N of patients at risk    | 4723  | 4395    | 4041   | 3858    | 3685    |
| N of patients with event |       | 272     | 420    | 468     | 524     |
| Cumulative incidence     |       | 5.8%    | 9%     | 10.1%   | 11.4%   |
| <b>Wave-1</b>            |       |         |        |         |         |
| N of patients at risk    | 4278  | 4023    | 3744   | 3602    | 3454    |
| N of patients with event |       | 234     | 384    | 430     | 475     |
| Cumulative incidence     |       | 5.5%    | 9%     | 10.2%   | 11.3%   |

**(A) Myocardial infarction**

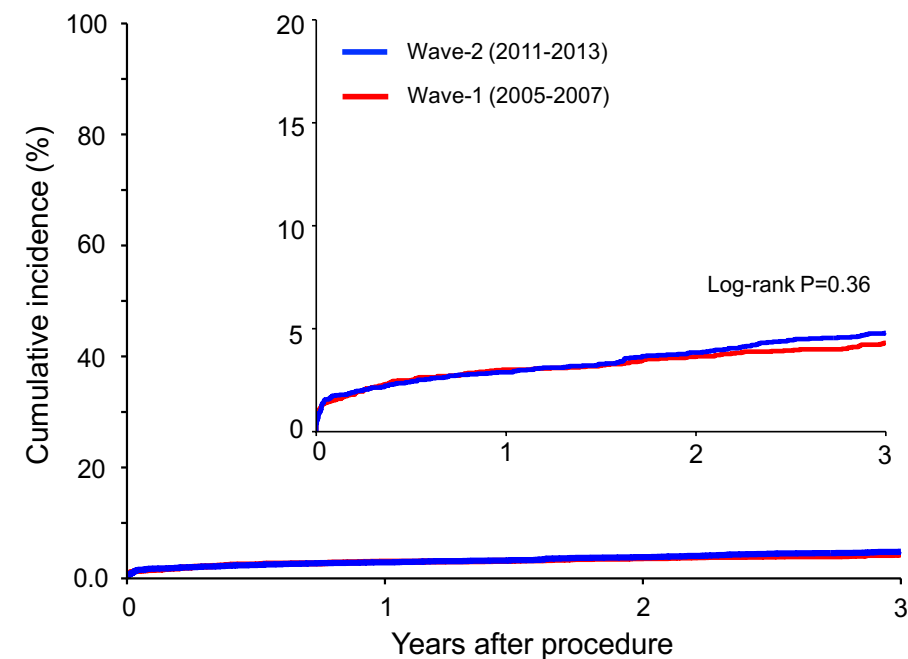

| Interval                 | 0 day | 30 days | 1 year | 2 years | 3 years |
|--------------------------|-------|---------|--------|---------|---------|
| <b>Wave-2</b>            |       |         |        |         |         |
| N of patients at risk    | 4723  | 4332    | 3940   | 3729    | 3539    |
| N of patients with event |       | 79      | 128    | 166     | 202     |
| Cumulative incidence     |       | 1.7%    | 2.9%   | 3.8%    | 4.8%    |
| <b>Wave-1</b>            |       |         |        |         |         |
| N of patients at risk    | 4278  | 3967    | 3651   | 3499    | 3337    |
| N of patients with event |       | 64      | 122    | 146     | 169     |
| Cumulative incidence     |       | 1.5%    | 3.0%   | 3.7%    | 4.3%    |

**(B) Definite stent thrombosis**

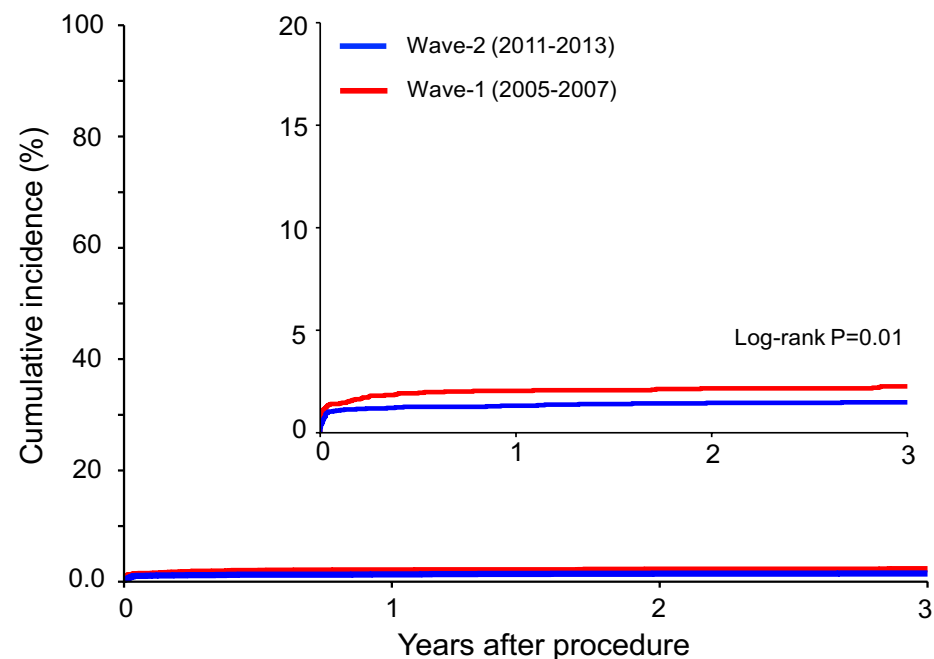

| Interval                 | 0 day | 30 days | 1 year | 2 years | 3 years |
|--------------------------|-------|---------|--------|---------|---------|
| <b>Wave-2</b>            |       |         |        |         |         |
| N of patients at risk    | 4241  | 3945    | 3642   | 3476    | 3335    |
| N of patients with event |       | 45      | 54     | 59      | 60      |
| Cumulative incidence     |       | 1.1%    | 1.3%   | 1.5%    | 1.5%    |
| <b>Wave-1</b>            |       |         |        |         |         |
| N of patients at risk    | 3739  | 3494    | 3257   | 3137    | 3012    |
| N of patients with event |       | 52      | 74     | 78      | 81      |
| Cumulative incidence     |       | 1.4%    | 2.0%   | 2.2%    | 2.3%    |

**(C) Major bleeding**

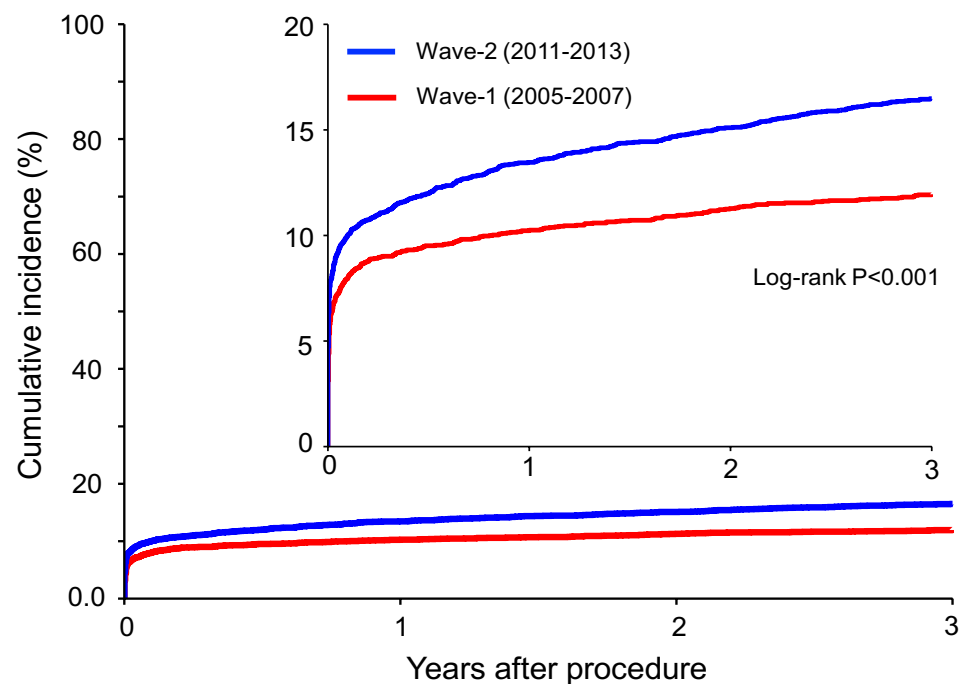

| Interval                 | 0 day | 30 days | 1 year | 2 years | 3 years |
|--------------------------|-------|---------|--------|---------|---------|
| <b>Wave-2</b>            |       |         |        |         |         |
| N of patients at risk    | 4723  | 4067    | 3665   | 3453    | 3276    |
| N of patients with event |       | 457     | 618    | 686     | 741     |
| Cumulative incidence     |       | 9.8%    | 13.5%  | 15.1%   | 16.5%   |
| <b>Wave-1</b>            |       |         |        |         |         |
| N of patients at risk    | 4278  | 3773    | 3485   | 3393    | 3180    |
| N of patients with event |       | 331     | 428    | 467     | 492     |
| Cumulative incidence     |       | 7.8%    | 10.3%  | 11.3%   | 12.0%   |

**(D) Any coronary revascularization**

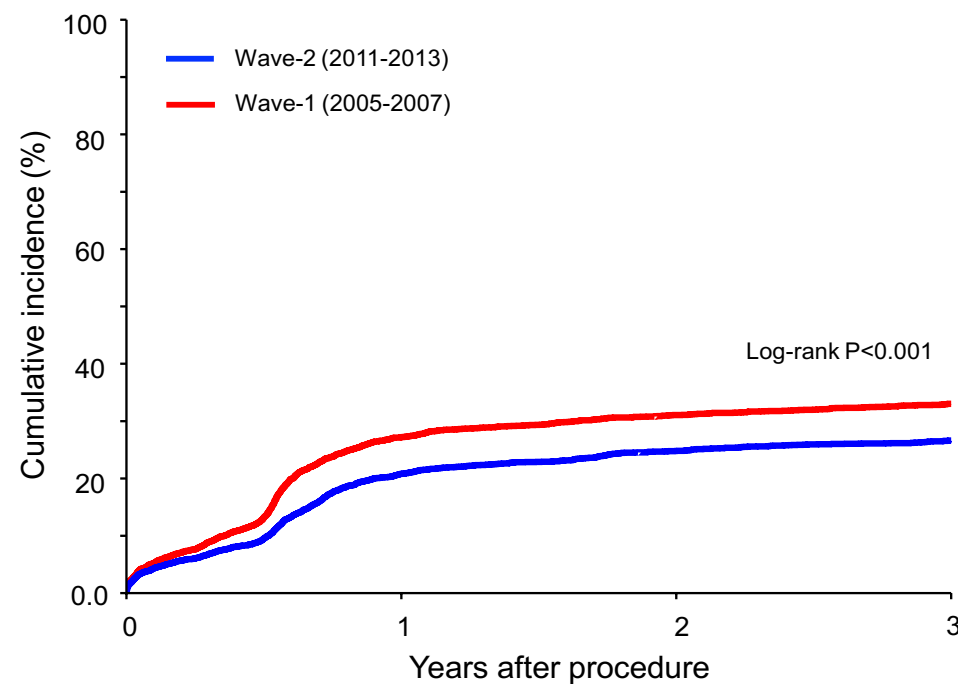

| Interval                 | 0 day | 30 days | 1 year | 2 years | 3 years |
|--------------------------|-------|---------|--------|---------|---------|
| <b>Wave-2</b>            |       |         |        |         |         |
| N of patients at risk    | 4723  | 4236    | 3210   | 2894    | 2690    |
| N of patients with event |       | 178     | 885    | 1043    | 1112    |
| Cumulative incidence     |       | 3.9%    | 20.8%  | 24.8%   | 26.6%   |
| <b>Wave-1</b>            |       |         |        |         |         |
| N of patients at risk    | 4278  | 3836    | 2735   | 2487    | 2298    |
| N of patients with event |       | 206     | 1066   | 1209    | 1277    |
| Cumulative incidence     |       | 5.0%    | 27.2%  | 31.1%   | 33.0%   |

**SUPPLEMENTARY MATERIAL**

**Table of contents**

**Supplementary Appendix (A-C) .....2**

**Supplementary figure legends (I-IV) .....9**

For peer review only

1  
2  
3  
4  
5  
6  
7  
8  
9  
10  
11  
12  
13  
14  
15  
16  
17  
18  
19  
20  
21  
22  
23  
24  
25  
26  
27  
28  
29  
30  
31  
32  
33  
34  
35  
36  
37  
38  
39  
40  
41  
42  
43  
44  
45  
46  
47  
48  
49  
50  
51  
52  
53  
54  
55  
56  
57  
58  
59  
60

## Supplemental Appendix A: List of participating centers and investigators

### The CREDO-Kyoto AMI Registry Wave-1

#### Cardiology

Kyoto University Hospital: Takeshi Kimura, Hiroki Shiomi

Kishiwada City Hospital: Mitsuo Matsuda, Hirokazu Mitsuoka

Tenri Hospital: Yoshihisa Nakagawa

Hyogo Prefectural Amagasaki Hospital: Hisayoshi Fujiwara, Yoshiki Takatsu, Ryoji

Taniguchi

Kitano Hospital: Ryuji Nohara

Koto Memorial Hospital: Tomoyuki Murakami, Teruki Takeda

Kokura Memorial Hospital: Masakiyo Nobuyoshi, Masashi Iwabuchi

Maizuru Kyosai Hospital: Ryozo Tatami

Nara Hospital, Kinki University Faculty of Medicine: Manabu Shirotni

Kobe City Medical Center General Hospital: Toru Kita, Yutaka Furukawa, Natsuhiko Ehara

Nishi-Kobe Medical Center: Hiroshi Kato, Hiroshi Eizawa

Kansai Denryoku Hospital: Katsuhisa Ishii

Osaka Red Cross Hospital: Masaru Tanaka

University of Fukui Hospital: Jong-Dae Lee, Akira Nakano

Shizuoka City Shizuoka Hospital: Akinori Takizawa

Hamamatsu Rosai Hospital: Masaaki Takahashi

Shiga University of Medical Science Hospital: Minoru Horie, Hiroyuki Takashima

Japanese Red Cross Wakayama Medical Center: Takashi Tamura

Shimabara Hospital: Mamoru Takahashi

Kagoshima University Medica and Dental Hospital: Chuwa Tei, Shuichi Hamasaki



1  
2  
3 Shizuoka General Hospital: Hirofumi Kambara, Osamu Doi, Satoshi Kaburagi

4  
5 Kurashiki Central Hospital: Kazuaki Mitsudo, Kazushige Kadota

6  
7 Mitsubishi Kyoto Hospital: Shinji Miki, Tetsu Mizoguchi

8  
9 Kumamoto University Hospital: Hisao Ogawa, Seigo Sugiyama

10  
11 Shimada Municipal Hospital: Ryuichi Hattori, Takeshi Aoyama, Makoto Araki

12  
13 Juntendo University Shizuoka Hospital: Satoru Suwa

14  
15  
16  
17  
18  
19 **Cardiovascular Surgery**

20  
21 Kyoto University Hospital: Ryuzo Sakata, Tadashi Ikeda, Akira Marui

22  
23 Kishiwada City Hospital: Masahiko Onoe

24  
25 Tenri Hospital: Kazuo Yamanaka

26  
27 Hyogo Prefectural Amagasaki Hospital: Keiichi Fujiwara, Nobuhisa Ohno

28  
29 Kokura Memorial Hospital: Michiya Hanyu

30  
31 Maizuru Kyosai Hospital: Tsutomu Matsushita

32  
33 Nara Hospital, Kinki University Faculty of Medicine: Noboru Nishiwaki, Yuichi Yoshida

34  
35 Kobe City Medical Center General Hospital: Yukikatsu Okada, Michihiro Nasu

36  
37 Osaka Red Cross Hospital: Shogo Nakayama

38  
39 University of Fukui Hospital: Kuniyoshi Tanaka, Takaaki Koshiji, Koichi Morioka

40  
41 Shizuoka City Shizuoka Hospital: Mitsuomi Shimamoto, Fumio Yamazaki

42  
43 Hamamatsu Rosai Hospital: Junichiro Nishizawa

44  
45 Japanese Red Cross Wakayama Medical Center: Masaki Aota

46  
47 Shimabara Hospital: Takafumi Tabata

48  
49 Kagoshima University Medica and Dental Hospital: Yutaka Imoto, Hiroyuki Yamamoto

50  
51 Shizuoka General Hospital: Katsuhiko Matsuda, Masafumi Nara

52  
53 Kurashiki Central Hospital: Tatsuhiko Komiya

1  
2  
3 Mitsubishi Kyoto Hospital: Hiroyuki Nakajima  
4

5 Kumamoto University Hospital: Michio Kawasuji, Syuji Moriyama  
6

7  
8 Juntendo University Shizuoka Hospital: Keichi Tanbara  
9

10  
11  
12  
13  
14  
15  
16  
17  
18  
19  
20  
21  
22  
23  
24  
25  
26  
27  
28  
29  
30  
31  
32  
33  
34  
35  
36  
37  
38  
39  
40  
41  
42  
43  
44  
45  
46  
47  
48  
49  
50  
51  
52  
53  
54  
55  
56  
57  
58  
59  
60

For peer review only

## **The CREDO-Kyoto AMI Registry Wave-2**

### **Cardiology**

Kyoto University Hospital: Takeshi Kimura, Hiroki Shiomi

Kishiwada City Hospital: Mitsuo Matsuda, Takashi Uegaito

Tenri Hospital: Toshihiro Tamura

Hyogo Prefectural Amagasaki General Medical Center: Yukihiro Sato, Ryoji Taniguchi

Kitano Hospital: Moriaki Inoko

Koto Memorial Hospital: Tomoyuki Murakami, Teruki Takeda

Kokura Memorial Hospital: Kenji Ando, Takenori Domei

Kindai University Nara Hospital: Manabu Shirotani

Kobe City Medical Center General Hospital: Yutaka Furukawa, Natsuhiko Ehara

Kobe City Nishi-Kobe Medical Center: Hiroshi Eizawa

Kansai Denryoku Hospital: Katsuhisa Ishii, Eiji Tada

Osaka Red Cross Hospital: Masaru Tanaka, Tsukasa Inada

Shizuoka City Shizuoka Hospital: Tomoya Onodera, Ryuzo Nawada

Hamamatsu Rosai Hospital: Eiji Shinoda, Miho Yamada

Shiga University of Medical Science Hospital: Takashi Yamamoto, Hiroshi Sakai

Japanese Red Cross Wakayama Medical Center: Takashi Tamura, Mamoru Toyofuku

Shimabara Hospital: Mamoru Takahashi

Shizuoka General Hospital: Hiroki Sakamoto, Tomohisa Tada

Kurashiki Central Hospital: Kazushige Kadota, Takeshi Tada

Mitsubishi Kyoto Hospital: Shinji Miki, Kazuhisa Kaneda

Shimada Municipal Hospital: Takeshi Aoyama

Juntendo University Shizuoka Hospital: Satoru Suwa

**Cardiovascular Surgery**

Kyoto University Hospital: Kenji Minatoya, Kazuhiro Yamazaki

Kishiwada City Hospital: Tatsuya Ogawa

Tenri Hospital: Atsushi Iwakura

Hyogo Prefectural Amagasaki General Medical Center: Nobuhisa Ohno

Kitano Hospital: Michiya Hanyu

Kokura Memorial Hospital: Yoshiharu Soga, Akira Marui

Kindai University Nara Hospital: Nobushige Tamura

Kobe City Medical Center General Hospital: Tadaaki Koyama

Osaka Red Cross Hospital: Shogo Nakayama

Shizuoka City Shizuoka Hospital: Fumio Yamazaki, Yasuhiko Terai

Hamamatsu Rosai Hospital: Junichiro Nishizawa

Japanese Red Cross Wakayama Medical Center: Naoki Kanemitsu, Hiroyuki Hara

Shizuoka General Hospital: Hiroshi Tsuneyoshi

Kurashiki Central Hospital: Tatsuhiko Komiya

Mitsubishi Kyoto Hospital: Jiro Esaki

Juntendo University Shizuoka Hospital: Keiichi Tambara

1  
2  
3 **Supplemental Appendix B: List of clinical research coordinators**  
4

5 **The CREDO-Kyoto AMI Registry Wave-1**  
6

7  
8 Research Institute for Production Development  
9

10 Kumiko Kitagawa, Misato Yamauchi, Naoko Okamoto, Yumika Fujino, Saori Tezuka, Asuka  
11

12 Saeki, Miya Hanazawa, Yuki Sato, Chikako Hibi, Hitomi Sasae, Emi Takinami, Yuriko  
13

14 Uchida, Yuko Yamamoto, Satoko Nishida, Mai Yoshimoto, Sachiko Maeda, Izumi Miki,  
15

16  
17 Saeko Minematsu  
18  
19  
20

21 **The CREDO-Kyoto AMI Registry Wave-2**  
22

23  
24 Research Institute for Production Development  
25

26 Sakiko Arimura, Yumika Fujino, Miya Hanazawa, Chikako Hibi, Risa Kato, Yui Kinoshita,  
27

28 Kumiko Kitagawa, Masayo Kitamura, Takahiro Kuwahara, Satoko Nishida, Naoko Okamoto,  
29

30 Yuki Sato, Saori Tezuka, Marina Tsuda, Miyuki Tsumori, Misato Yamauchi, Itsuki  
31

32  
33 Yamazaki  
34  
35  
36  
37  
38  
39  
40  
41  
42  
43  
44  
45  
46  
47  
48  
49  
50  
51  
52  
53  
54  
55  
56  
57  
58  
59  
60

## Supplemental Appendix C: List of the clinical event committee members

### The CREDO-Kyoto AMI Registry Wave-1

Mitsuru Abe (Kyoto Medical Center), Hiroki Shiomi (Kyoto University Hospital), Tomohisa Tada (Deutsches Herzzentrum), Junichi Tazaki (Kyoto University Hospital), Yoshihiro Kato (Saiseikai Noe Hospital), Mamoru Hayano (Gunma Cardiovascular Center), Akihiro Tokushige (Kagoshima University Hospital), Masahiro Natsuaki (Kyoto University Hospital), Tetsu Nakajima (Kyoto University Hospital).

### The CREDO-Kyoto AMI Registry Wave-2

Masayuki Fuki (Kyoto University Hospital), Eri Toda Kato (Kyoto University Hospital), Yukiko Matsumura-Nakano (Kyoto University Hospital), Kenji Nakatsuma (Mitsubishi Kyoto Hospital), Hiroki Shiomi (Kyoto University Hospital), Yasuaki Takeji (Kyoto University Hospital), Hidenori Yaku (Mitsubishi Kyoto Hospital), Erika Yamamoto (Kyoto University Hospital), Ko Yamamoto (Kyoto University Hospital), Yugo Yamashita (Kyoto University Hospital), Yusuke Yoshikawa (Kyoto University Hospital), Hiroki Watanabe (Japanese Red Cross Wakayama Medical Center)

## Supplementary figure legends

**Supplemental Figure I. Landmark analysis within and beyond 30 days for all-cause death comparing between Wave-1 and Wave-2 in (A) entire study population, (B) patients with cardiogenic shock, and (C) patients without cardiogenic shock**

HR=hazard ratio; CI=confidence interval.

**Supplemental Figure II. Landmark analysis within and beyond 30 days for major bleeding comparing between Wave-1 and Wave-2**

Major bleeding was defined as GUSTO moderate/severe bleeding.

HR=hazard ratio; CI=confidence interval; GUSTO=global utilization of streptokinase and tissue plasminogen activator for occluded coronary arteries.

**Supplemental Figure III . Kaplan-Meier curves for major bleeding comparing between Wave-1 and Wave-2 (A) in patients with ARC-HBR and (B) in patients without ARC-HBR**

ARC-HBR=academic research consortium-high bleeding risk; HR=hazard ratio; CI=confidence interval.

**Supplemental Figure IV. Kaplan-Meier curves for persistent DAPT discontinuation comparing between Wave-1 and Wave-2**

Persistent discontinuation of DAPT was defined as withdrawal of either thienopyridines or aspirin for at least 2 months.

DAPT=dual antiplatelet therapy.

1 Supplemental Figure I. Landmark analysis within and beyond 30 days for all-cause  
 2 death comparing between Wave-1 and Wave-2 (A) in entire study population, (B) in  
 3 patients with cardiogenic shock, and (C) in patients without cardiogenic shock

(A) All-cause death in entire study population

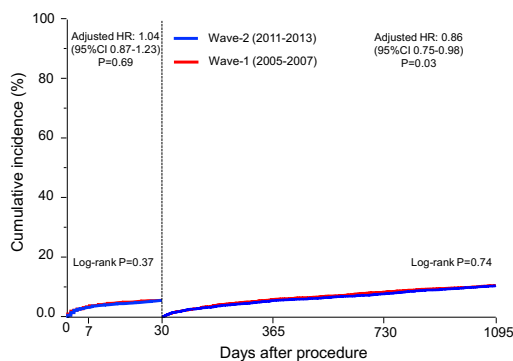

| Interval                 | 0 day | 7 days | 30 days | 1 year | 2 years | 3 years |
|--------------------------|-------|--------|---------|--------|---------|---------|
| <b>Wave-2</b>            |       |        |         |        |         |         |
| N of patients at risk    | 4723  | 4551   | 4395    | 4041   | 3858    | 3685    |
| N of patients with event | 183   | 280    | 222     | 328    | 442     | 442     |
| Cumulative incidence     |       | 3.9%   | 5.9%    | 5.1%   | 7.6%    | 10.4%   |
| <b>Wave-1</b>            |       |        |         |        |         |         |
| N of patients at risk    | 4278  | 4137   | 4023    | 3744   | 3602    | 3454    |
| N of patients with event | 154   | 235    | 223     | 329    | 419     | 419     |
| Cumulative incidence     |       | 3.6%   | 5.5%    | 5.6%   | 8.3%    | 10.6%   |

(B) All-cause death in patients with cardiogenic shock



| Interval                 | 0 day | 7 days | 30 days | 1 year | 2 years | 3 years |
|--------------------------|-------|--------|---------|--------|---------|---------|
| <b>Wave-2</b>            |       |        |         |        |         |         |
| N of patients at risk    | 757   | 629    | 556     | 446    | 407     | 375     |
| N of patients with event | 136   | 193    | 73      | 100    | 123     | 123     |
| Cumulative incidence     |       | 18.0%  | 25.6%   | 13.7%  | 19.0%   | 23.6%   |
| <b>Wave-1</b>            |       |        |         |        |         |         |
| N of patients at risk    | 596   | 506    | 450     | 370    | 346     | 317     |
| N of patients with event | 100   | 143    | 74      | 96     | 114     | 114     |
| Cumulative incidence     |       | 16.8%  | 24.0%   | 16.6%  | 21.5%   | 25.7%   |

(C) All-cause death in patients without cardiogenic shock

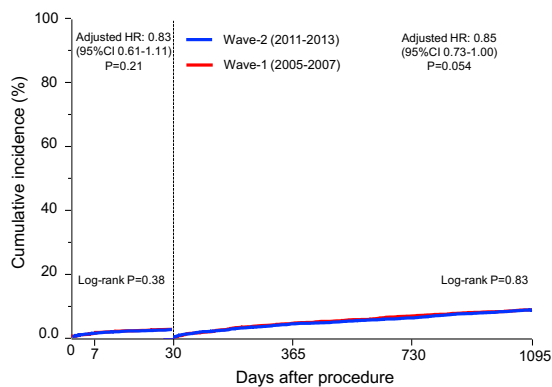

| Interval                 | 0 day | 7 days | 30 days | 1 year | 2 years | 3 years |
|--------------------------|-------|--------|---------|--------|---------|---------|
| <b>Wave-2</b>            |       |        |         |        |         |         |
| N of patients at risk    | 3966  | 3922   | 3839    | 3595   | 3451    | 3310    |
| N of patients with event | 47    | 87     | 149     | 228    | 319     | 319     |
| Cumulative incidence     |       | 1.2%   | 2.2%    | 3.9%   | 6.1%    | 8.6%    |
| <b>Wave-1</b>            |       |        |         |        |         |         |
| N of patients at risk    | 3682  | 3631   | 3573    | 3374   | 3256    | 3137    |
| N of patients with event | 54    | 92     | 149     | 233    | 305     | 305     |
| Cumulative incidence     |       | 1.5%   | 2.5%    | 4.2%   | 6.6%    | 8.7%    |



1 Supplemental Figure II. Landmark analysis within and beyond 30 days for major  
 2 bleeding comparing between Wave-1 and Wave-2

3  
 4  
 5  
 6  
 7  
 8 **Major bleeding**



| Interval                 | 0 day | 7 days | 30 days | 1 year | 2 years | 3 years |
|--------------------------|-------|--------|---------|--------|---------|---------|
| <b>Wave-2</b>            |       |        |         |        |         |         |
| N of patients at risk    | 4723  | 4234   | 4067    | 3665   | 3453    | 3276    |
| N of patients with event |       | 383    | 457     | 161    | 229     | 284     |
| Cumulative incidence     |       | 8.2%   | 9.8%    | 4.1%   | 5.9%    | 7.4%    |
| <b>Wave-1</b>            |       |        |         |        |         |         |
| N of patients at risk    | 4278  | 3909   | 3773    | 3485   | 3333    | 3189    |
| N of patients with event |       | 272    | 331     | 97     | 136     | 161     |
| Cumulative incidence     |       | 6.4%   | 7.8%    | 2.6%   | 3.7%    | 4.5%    |

3

1 Supplemental Figure III. Kaplan-Meier curves for major bleeding comparing between Wave-1 and Wave-2 for major bleeding (A) in  
 2 patients with ARC-HBR and (B) in patients without ARC-HBR

(A) Major bleeding in patients with ARC-HBR



| Interval                 | 0 day | 30 days | 1 year | 2 years | 3 years |
|--------------------------|-------|---------|--------|---------|---------|
| <b>Wave-2</b>            |       |         |        |         |         |
| N of patients at risk    | 2213  | 1736    | 1454   | 1308    | 1199    |
| N of patients with event |       | 322     | 430    | 476     | 508     |
| Cumulative incidence     |       | 14.8%   | 20.4%  | 23.0%   | 25.0%   |
| <b>Wave-1</b>            |       |         |        |         |         |
| N of patients at risk    | 1811  | 1451    | 1259   | 1170    | 1082    |
| N of patients with event |       | 237     | 293    | 313     | 328     |
| Cumulative incidence     |       | 13.4%   | 16.8%  | 18.2%   | 19.3%   |

(B) Major bleeding in patients without ARC-HBR



| Interval                 | 0 day | 30 days | 1 year | 2 years | 3 years |
|--------------------------|-------|---------|--------|---------|---------|
| <b>Wave-2</b>            |       |         |        |         |         |
| N of patients at risk    | 2510  | 2331    | 2211   | 2145    | 2077    |
| N of patients with event |       | 135     | 188    | 210     | 233     |
| Cumulative incidence     |       | 5.4%    | 7.6%   | 8.5%    | 9.5%    |
| <b>Wave-1</b>            |       |         |        |         |         |
| N of patients at risk    | 2467  | 2322    | 2226   | 2163    | 2107    |
| N of patients with event |       | 94      | 135    | 154     | 164     |
| Cumulative incidence     |       | 3.8%    | 5.5%   | 6.4%    | 6.8%    |

3

4

1 Supplemental Figure IV. Kaplan-Meier curves for persistent DAPT discontinuation  
 2 comparing between Wave-1 and Wave-2

8 **Persistent DAPT discontinuation**

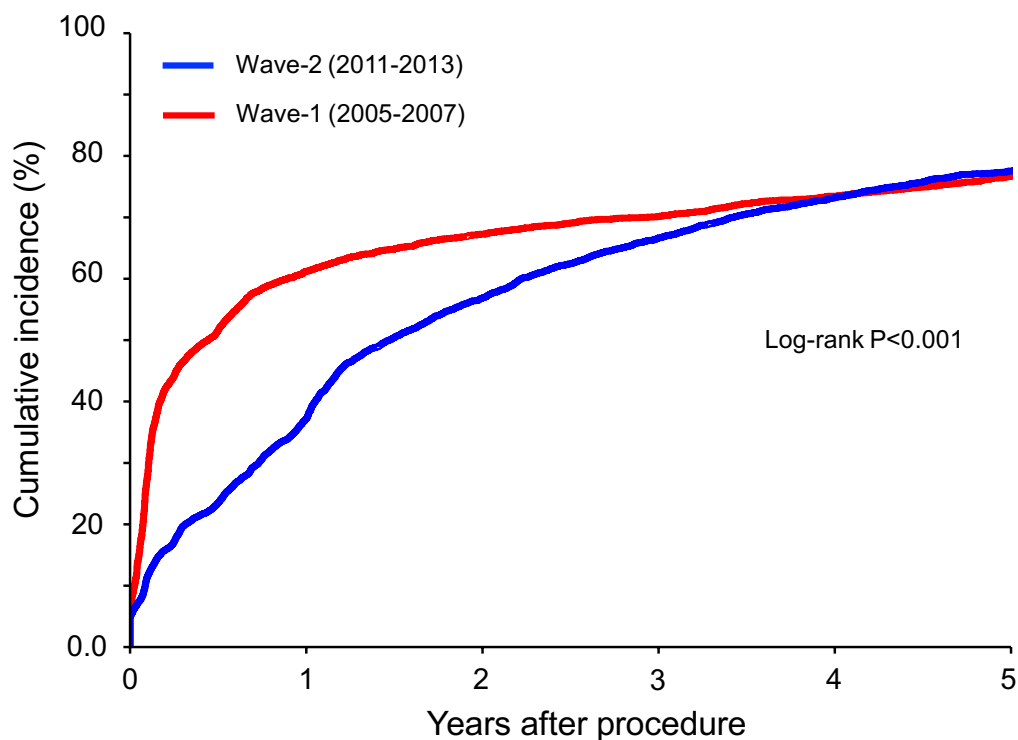

| Interval              | 0 day | 30 days | 1 year | 2 years | 3 years | 4 years | 5 years |
|-----------------------|-------|---------|--------|---------|---------|---------|---------|
| <b>Wave-2</b>         |       |         |        |         |         |         |         |
| N of patients at risk | 4625  | 3987    | 2603   | 1716    | 1272    | 971     | 700     |
| Cumulative incidence  |       | 9.6%    | 37.2%  | 56.9%   | 66.7%   | 73.2%   | 77.5%   |
| <b>Wave-1</b>         |       |         |        |         |         |         |         |
| N of patients at risk | 4180  | 3093    | 1457   | 1186    | 1029    | 849     | 442     |
| Cumulative incidence  |       | 23.7%   | 61.2%  | 67.3%   | 70.1%   | 73.4%   | 76.7%   |

3  
4  
5  
6  
7

STROBE Statement—Checklist of items that should be included in reports of *cohort studies*

|                              | Item No | Recommendation                                                                                                                                                                                    | Page No |
|------------------------------|---------|---------------------------------------------------------------------------------------------------------------------------------------------------------------------------------------------------|---------|
| <b>Title and abstract</b>    | 1       | (a) Indicate the study's design with a commonly used term in the title or the abstract                                                                                                            | 1       |
|                              |         | (b) Provide in the abstract an informative and balanced summary of what was done and what was found                                                                                               | 4       |
| <b>Introduction</b>          |         |                                                                                                                                                                                                   |         |
| Background/rationale         | 2       | Explain the scientific background and rationale for the investigation being reported                                                                                                              | 7       |
| Objectives                   | 3       | State specific objectives, including any prespecified hypotheses                                                                                                                                  | 7       |
| <b>Methods</b>               |         |                                                                                                                                                                                                   |         |
| Study design                 | 4       | Present key elements of study design early in the paper                                                                                                                                           | 8       |
| Setting                      | 5       | Describe the setting, locations, and relevant dates, including periods of recruitment, exposure, follow-up, and data collection                                                                   | 8       |
| Participants                 | 6       | (a) Give the eligibility criteria, and the sources and methods of selection of participants. Describe methods of follow-up                                                                        | 8-9     |
|                              |         | (b) For matched studies, give matching criteria and number of exposed and unexposed                                                                                                               | 8-9     |
| Variables                    | 7       | Clearly define all outcomes, exposures, predictors, potential confounders, and effect modifiers. Give diagnostic criteria, if applicable                                                          | 9       |
| Data sources/<br>measurement | 8*      | For each variable of interest, give sources of data and details of methods of assessment (measurement). Describe comparability of assessment methods if there is more than one group              | 9       |
| Bias                         | 9       | Describe any efforts to address potential sources of bias                                                                                                                                         | 9       |
| Study size                   | 10      | Explain how the study size was arrived at                                                                                                                                                         | 9       |
| Quantitative variables       | 11      | Explain how quantitative variables were handled in the analyses. If applicable, describe which groupings were chosen and why                                                                      | 9       |
| Statistical methods          | 12      | (a) Describe all statistical methods, including those used to control for confounding                                                                                                             | 11      |
|                              |         | (b) Describe any methods used to examine subgroups and interactions                                                                                                                               | 11      |
|                              |         | (c) Explain how missing data were addressed                                                                                                                                                       | 11      |
|                              |         | (d) If applicable, explain how loss to follow-up was addressed                                                                                                                                    | 11      |
|                              |         | (e) Describe any sensitivity analyses                                                                                                                                                             | N/A     |
| <b>Results</b>               |         |                                                                                                                                                                                                   |         |
| Participants                 | 13*     | (a) Report numbers of individuals at each stage of study—eg numbers potentially eligible, examined for eligibility, confirmed eligible, included in the study, completing follow-up, and analysed | 8       |
|                              |         | (b) Give reasons for non-participation at each stage                                                                                                                                              | 8       |
|                              |         | (c) Consider use of a flow diagram                                                                                                                                                                | 8       |
| Descriptive data             | 14*     | (a) Give characteristics of study participants (eg demographic, clinical, social) and information on exposures and potential confounders                                                          | 13      |
|                              |         | (b) Indicate number of participants with missing data for each variable of interest                                                                                                               | 13      |
|                              |         | (c) Summarise follow-up time (eg, average and total amount)                                                                                                                                       | 11      |
| Outcome data                 | 15*     | Report numbers of outcome events or summary measures over time                                                                                                                                    | 14      |

|    |                          |    |                                                                                                                                                                                                              |       |
|----|--------------------------|----|--------------------------------------------------------------------------------------------------------------------------------------------------------------------------------------------------------------|-------|
| 1  | Main results             | 16 | (a) Give unadjusted estimates and, if applicable, confounder-adjusted estimates and their precision (eg, 95% confidence interval). Make clear which confounders were adjusted for and why they were included | 14    |
| 2  |                          |    | (b) Report category boundaries when continuous variables were categorized                                                                                                                                    | 14    |
| 3  |                          |    | (c) If relevant, consider translating estimates of relative risk into absolute risk for a meaningful time period                                                                                             | 14    |
| 4  |                          |    |                                                                                                                                                                                                              |       |
| 5  |                          |    |                                                                                                                                                                                                              |       |
| 6  | Other analyses           | 17 | Report other analyses done—eg analyses of subgroups and interactions, and sensitivity analyses                                                                                                               | 14    |
| 7  |                          |    |                                                                                                                                                                                                              |       |
| 8  |                          |    |                                                                                                                                                                                                              |       |
| 9  |                          |    |                                                                                                                                                                                                              |       |
| 10 |                          |    |                                                                                                                                                                                                              |       |
| 11 | <b>Discussion</b>        |    |                                                                                                                                                                                                              |       |
| 12 | Key results              | 18 | Summarise key results with reference to study objectives                                                                                                                                                     | 15    |
| 13 | Limitations              | 19 | Discuss limitations of the study, taking into account sources of potential bias or imprecision. Discuss both direction and magnitude of any potential bias                                                   | 17    |
| 14 |                          |    |                                                                                                                                                                                                              |       |
| 15 | Interpretation           | 20 | Give a cautious overall interpretation of results considering objectives, limitations, multiplicity of analyses, results from similar studies, and other relevant evidence                                   | 16-17 |
| 16 |                          |    |                                                                                                                                                                                                              |       |
| 17 | Generalisability         | 21 | Discuss the generalisability (external validity) of the study results                                                                                                                                        | 17    |
| 18 |                          |    |                                                                                                                                                                                                              |       |
| 19 |                          |    |                                                                                                                                                                                                              |       |
| 20 | <b>Other information</b> |    |                                                                                                                                                                                                              |       |
| 21 | Funding                  | 22 | Give the source of funding and the role of the funders for the present study and, if applicable, for the original study on which the present article is based                                                | 24    |
| 22 |                          |    |                                                                                                                                                                                                              |       |
| 23 |                          |    |                                                                                                                                                                                                              |       |
| 24 |                          |    |                                                                                                                                                                                                              |       |
| 25 |                          |    |                                                                                                                                                                                                              |       |

\*Give information separately for exposed and unexposed groups.

**Note:** An Explanation and Elaboration article discusses each checklist item and gives methodological background and published examples of transparent reporting. The STROBE checklist is best used in conjunction with this article (freely available on the Web sites of PLoS Medicine at <http://www.plosmedicine.org/>, Annals of Internal Medicine at <http://www.annals.org/>, and Epidemiology at <http://www.epidem.com/>). Information on the STROBE Initiative is available at <http://www.strobe-statement.org>.

# BMJ Open

## Changes in Demographics, Clinical Practices, and Long-term Outcomes of Patients with ST-segment-elevation Myocardial Infarction who Underwent Coronary Revascularization in the Past Two Decades: Cohort Study

|                               |                                                                                                                                                                                                                                                                                                                                                                                                                                                                                                                                                                                                                                                                                                                                                                                                                                                                                                                                                                                                                                                                                                                                                                                                                                                                                                                                                                                                                                                                                                                                                                                                                                                                                                                                                                                                                                                                                                                                                                                                                                                                                                                                                                                                                                                                 |
|-------------------------------|-----------------------------------------------------------------------------------------------------------------------------------------------------------------------------------------------------------------------------------------------------------------------------------------------------------------------------------------------------------------------------------------------------------------------------------------------------------------------------------------------------------------------------------------------------------------------------------------------------------------------------------------------------------------------------------------------------------------------------------------------------------------------------------------------------------------------------------------------------------------------------------------------------------------------------------------------------------------------------------------------------------------------------------------------------------------------------------------------------------------------------------------------------------------------------------------------------------------------------------------------------------------------------------------------------------------------------------------------------------------------------------------------------------------------------------------------------------------------------------------------------------------------------------------------------------------------------------------------------------------------------------------------------------------------------------------------------------------------------------------------------------------------------------------------------------------------------------------------------------------------------------------------------------------------------------------------------------------------------------------------------------------------------------------------------------------------------------------------------------------------------------------------------------------------------------------------------------------------------------------------------------------|
| Journal:                      | <i>BMJ Open</i>                                                                                                                                                                                                                                                                                                                                                                                                                                                                                                                                                                                                                                                                                                                                                                                                                                                                                                                                                                                                                                                                                                                                                                                                                                                                                                                                                                                                                                                                                                                                                                                                                                                                                                                                                                                                                                                                                                                                                                                                                                                                                                                                                                                                                                                 |
| Manuscript ID                 | bmjopen-2020-043683.R2                                                                                                                                                                                                                                                                                                                                                                                                                                                                                                                                                                                                                                                                                                                                                                                                                                                                                                                                                                                                                                                                                                                                                                                                                                                                                                                                                                                                                                                                                                                                                                                                                                                                                                                                                                                                                                                                                                                                                                                                                                                                                                                                                                                                                                          |
| Article Type:                 | Original research                                                                                                                                                                                                                                                                                                                                                                                                                                                                                                                                                                                                                                                                                                                                                                                                                                                                                                                                                                                                                                                                                                                                                                                                                                                                                                                                                                                                                                                                                                                                                                                                                                                                                                                                                                                                                                                                                                                                                                                                                                                                                                                                                                                                                                               |
| Date Submitted by the Author: | 20-Feb-2021                                                                                                                                                                                                                                                                                                                                                                                                                                                                                                                                                                                                                                                                                                                                                                                                                                                                                                                                                                                                                                                                                                                                                                                                                                                                                                                                                                                                                                                                                                                                                                                                                                                                                                                                                                                                                                                                                                                                                                                                                                                                                                                                                                                                                                                     |
| Complete List of Authors:     | <p>Takeji, Yasuaki; Kyoto University Graduate School of Medicine Faculty of Medicine<br/>         Shiomi, Hiroki; Kyoto University Graduate School of Medicine Faculty of Medicine, Department of Cardiovascular Medicine<br/>         Morimoto, Takeshi; Hyogo College of Medicine, Clinical Epidemiology<br/>         Yoshikawa, Yusuke; Kyoto University Graduate School of Medicine Faculty of Medicine, Department of Cardiovascular Medicine<br/>         Taniguchi, Ryoji; Hyogo Prefectural Amagasaki General Medical Center, Division of Cardiology<br/>         Mutsumura-Nakano, Yukiko; Kyoto University Graduate School of Medicine Faculty of Medicine<br/>         Yamamoto, Ko; Kyoto University Graduate School of Medicine Faculty of Medicine<br/>         Yamaji, Kyohei; Kokura Memorial Hospital, Division of Cardiology<br/>         Tazaki, Junichi; Kyoto University Graduate School of Medicine Faculty of Medicine, Department of Cardiovascular Medicine<br/>         Kato, Eri; Kyoto University Graduate School of Medicine Faculty of Medicine<br/>         Watanabe, Hirotoishi; Kyoto University Graduate School of Medicine Faculty of Medicine, Department of Cardiovascular Medicine<br/>         Yamamoto, Erika; Kyoto University Graduate School of Medicine Faculty of Medicine<br/>         Yamashita, Yugo; Kyoto University Graduate School of Medicine Faculty of Medicine<br/>         Fuki, Masayuki; Kyoto University Graduate School of Medicine Faculty of Medicine<br/>         Suwa, Satoru; Juntendo Shizuoka Hospital<br/>         Inoko, Moriaki; Kitano Hospital<br/>         Takeda, Teruki; Koto Memorial Hospital<br/>         Shirotani, Manabu; Kinki University School of Medicine Nara Hospital<br/>         Ehara, Natsuhiko; Kobe City Medical Center General Hospital<br/>         Ishii, Katsuhisa; Kansai Denryoku Hospital<br/>         Inada, Tsukasa; Osaka Red Cross Hospital, Cadiology<br/>         Tamura, Toshihiro; Tenri Hospital, Department of Cardiovascular Medicine<br/>         Onodera, Tomoya; Shizuoka City Shizuoka Hospital<br/>         Shinoda, Eiji; Hamamatsu Rosai Hospital<br/>         Yamamoto, Takashi; Shiga University of Medical Science, Department of</p> |

|                                    |                                                                                                                                                                                                                                                                                                                                                                                                                                                                                                                                                                                                                                                                                                                                                                                                                                                                                                                                                                    |
|------------------------------------|--------------------------------------------------------------------------------------------------------------------------------------------------------------------------------------------------------------------------------------------------------------------------------------------------------------------------------------------------------------------------------------------------------------------------------------------------------------------------------------------------------------------------------------------------------------------------------------------------------------------------------------------------------------------------------------------------------------------------------------------------------------------------------------------------------------------------------------------------------------------------------------------------------------------------------------------------------------------|
|                                    | Cardiovascular and Respiratory Medicine<br>Watanabe, Hiroki; Japan Red Cross Wakayama Medical Center,<br>Department of Cardiovascular medicine<br>Yaku, Hidenori; Mitsubishi Kyoto Hospital<br>Nakatsuma, Kenji; Mitsubishi Kyoto Hospital<br>Sakamoto, Hiroki; Shizuoka General Hospital<br>Ando, Kenji; Kokura Memorial Hospital, Division of Cardiology<br>Soga, Yoshiharu; Kokura Memorial Hospital<br>Furukawa, Yutaka; Kobe City Medical Center General Hospital<br>Sato, Yukihiro; Hyogo Prefectural Amagasaki Hospital<br>Nakagawa, Yoshihisa; Shiga University of Medical Science Hospital<br>Kadota, Kazushige; Kurashiki Central Hospital<br>Komiya, Tatsuhiko; Kurashiki Central Hospital<br>Minatoya, Kenji; Kyoto University Graduate School of Medicine Faculty of<br>Medicine, Department of Cardiovascular Surgery<br>Kimura, Takeshi; Kyoto University Graduate School of Medicine Faculty<br>of Medicine, Department of Cardiovascular Medicine |
| <b>Primary Subject<br>Heading</b>: | Cardiovascular medicine                                                                                                                                                                                                                                                                                                                                                                                                                                                                                                                                                                                                                                                                                                                                                                                                                                                                                                                                            |
| Secondary Subject Heading:         | Cardiovascular medicine                                                                                                                                                                                                                                                                                                                                                                                                                                                                                                                                                                                                                                                                                                                                                                                                                                                                                                                                            |
| Keywords:                          | Myocardial infarction < CARDIOLOGY, Coronary intervention <<br>CARDIOLOGY, Coronary heart disease < CARDIOLOGY                                                                                                                                                                                                                                                                                                                                                                                                                                                                                                                                                                                                                                                                                                                                                                                                                                                     |
|                                    |                                                                                                                                                                                                                                                                                                                                                                                                                                                                                                                                                                                                                                                                                                                                                                                                                                                                                                                                                                    |

SCHOLARONE™  
Manuscripts



I, the Submitting Author has the right to grant and does grant on behalf of all authors of the Work (as defined in the below author licence), an exclusive licence and/or a non-exclusive licence for contributions from authors who are: i) UK Crown employees; ii) where BMJ has agreed a CC-BY licence shall apply, and/or iii) in accordance with the terms applicable for US Federal Government officers or employees acting as part of their official duties; on a worldwide, perpetual, irrevocable, royalty-free basis to BMJ Publishing Group Ltd ("BMJ") its licensees and where the relevant Journal is co-owned by BMJ to the co-owners of the Journal, to publish the Work in this journal and any other BMJ products and to exploit all rights, as set out in our [licence](#).

The Submitting Author accepts and understands that any supply made under these terms is made by BMJ to the Submitting Author unless you are acting as an employee on behalf of your employer or a postgraduate student of an affiliated institution which is paying any applicable article publishing charge ("APC") for Open Access articles. Where the Submitting Author wishes to make the Work available on an Open Access basis (and intends to pay the relevant APC), the terms of reuse of such Open Access shall be governed by a Creative Commons licence – details of these licences and which [Creative Commons](#) licence will apply to this Work are set out in our licence referred to above.

Other than as permitted in any relevant BMJ Author's Self Archiving Policies, I confirm this Work has not been accepted for publication elsewhere, is not being considered for publication elsewhere and does not duplicate material already published. I confirm all authors consent to publication of this Work and authorise the granting of this licence.



1  
2  
3  
4  
5  
6  
7  
8  
9  
10  
11  
12  
13  
14  
15  
16  
17  
18  
19  
20  
21  
22  
23  
24  
25  
26  
27  
28  
29  
30  
31  
32  
33  
34  
35  
36  
37  
38  
39  
40  
41  
42  
43  
44  
45  
46  
47  
48  
49  
50  
51  
52  
53  
54  
55  
56  
57  
58  
59  
60

**Title: Changes in Demographics, Clinical Practices, and Long-term Outcomes of Patients with ST-segment-elevation Myocardial Infarction who Underwent Coronary Revascularization in the Past Two Decades: Cohort Study**

**Authors**

Yasuaki Takeji, M.D.<sup>1</sup>, Hiroki Shiomi, M.D.<sup>1</sup>, Takeshi Morimoto, M.D.<sup>2</sup>, Yusuke Yoshikawa, M.D.<sup>1</sup>, Ryoji Taniguchi, M.D.<sup>3</sup>, Yukiko Nakano, M.D.<sup>1</sup>, Ko Yamamoto, M.D.<sup>1</sup>, Kyohei Yamaji, M.D.<sup>4</sup>, Junichi Tazaki, M.D.<sup>1</sup>, Eri Toda Kato, M.D.<sup>1</sup>, Hirotoishi Watanabe, M.D.<sup>1</sup>, Erika Yamamoto, M.D.<sup>1</sup>, Yugo Yamashita, M.D.<sup>1</sup>, Masayuki Fuki, M.D.<sup>1</sup>, Satoru Suwa, M.D.<sup>5</sup>, Moriaki Inoko, M.D.<sup>6</sup>, Teruki Takeda, M.D.<sup>7</sup>, Manabu Shirotani, M.D.<sup>8</sup>, Natsuhiko Ehara, M.D.<sup>9</sup>, Katsuhisa Ishii, M.D.<sup>10</sup>, Tsukasa Inada, M.D.<sup>11</sup>, Toshihiro Tamura, M.D.<sup>12</sup>, Tomoya Onodera, M.D.<sup>13</sup>, Eiji Shinoda, M.D.<sup>14</sup>, Takashi Yamamoto, M.D.<sup>15</sup>, Hiroki Watanabe, M.D.<sup>16</sup>, Hidenori Yaku, M.D.<sup>17</sup>, Kenji Nakatsuma, M.D.<sup>17</sup>, Hiroki Sakamoto, M.D.<sup>18</sup>, Kenji Ando, M.D.<sup>4</sup>, Yoshiharu Soga, M.D.<sup>19</sup>, Yutaka Furukawa, M.D.<sup>9</sup>, Yukihito Sato, M.D.<sup>3</sup>, Yoshihisa Nakagawa, M.D.<sup>15</sup>, Kazushige Kadota, M.D.<sup>20</sup>, Tatsuhiko Komiya, M.D.<sup>21</sup>, Kenji Minatoya, M.D.<sup>22</sup>, Takeshi Kimura, M.D.<sup>1</sup>; the CREDO-Kyoto AMI Registry Wave-1 and the CREDO-Kyoto AMI Registry Wave-2 Investigators.

**Affiliations**

<sup>1</sup>Department of Cardiovascular Medicine, Graduate School of Medicine, Kyoto University, Kyoto, Japan; <sup>2</sup>Department of Clinical Epidemiology, Hyogo College of

1  
2  
3  
4  
5  
6  
7  
8  
9  
10  
11  
12  
13  
14  
15  
16  
17  
18  
19  
20  
21  
22  
23  
24  
25  
26  
27  
28  
29  
30  
31  
32  
33  
34  
35  
36  
37  
38  
39  
40  
41  
42  
43  
44  
45  
46  
47  
48  
49  
50  
51  
52  
53  
54  
55  
56  
57  
58  
59  
60

Medicine, Nishinomiya, Japan; <sup>3</sup>Department of Cardiology, Hyogo Prefectural Amagasaki Hospital, Amagasaki, Japan; <sup>4</sup>Division of Cardiology, Kokura Memorial Hospital, Kitakyushu, Japan; <sup>5</sup>Department of Cardiovascular Medicine, Juntendo University Shizuoka Hospital, Izunokuni, Japan; <sup>6</sup>Cardiovascular Center, The Tazuke Kofukai Medical Research Institute, Kitano Hospital, Osaka, Japan; <sup>7</sup>Department of Cardiology, Koto Memorial Hospital, Higashiomi, Japan; <sup>8</sup>Division of Cardiology, Nara Hospital, Kinki University Faculty of Medicine, Ikoma, Japan; <sup>9</sup>Department of Cardiovascular Medicine, Kobe City Medical Center General Hospital, Kobe, Japan; <sup>10</sup>Department of Cardiovascular Medicine, Kansai Denryoku Hospital, Osaka, Japan; <sup>11</sup>Department of Cardiovascular Medicine, Osaka Red Cross Hospital, Osaka, Japan; <sup>12</sup>Department of Cardiology, Tenri Hospital, Tenri, Japan; <sup>13</sup>Department of Cardiology, Shizuoka City Shizuoka Hospital, Shizuoka, Japan, <sup>14</sup>Department of Cardiovascular Medicine, Hamamatsu Rosai Hospital, Hamamatsu, Japan; <sup>15</sup>Department of Cardiovascular Medicine, Shiga University of Medical Science Hospital, Otsu, Japan; <sup>16</sup>Department of Cardiology, Japanese Red Cross Wakayama Medical Center, Wakayama, Japan; <sup>17</sup>Department of Cardiology, Mitsubishi Kyoto Hospital, Kyoto, Japan; <sup>18</sup>Department of Cardiology, Shizuoka General Hospital, Shizuoka, Japan; <sup>19</sup>Division of Cardiovascular surgery, Kokura Memorial Hospital, Kitakyushu, Japan; <sup>20</sup>Department of Cardiology and <sup>21</sup>Cardiovascular Surgery, Kurashiki Central Hospital, Kurashiki, Japan; <sup>22</sup>Department of Cardiovascular Surgery, Graduate School of Medicine, Kyoto University, Kyoto, Japan

**Correspondence author:** Takeshi Kimura, MD, PhD

1  
2  
3  
4  
5 Department of Cardiovascular Medicine, Kyoto University Graduate School of  
6  
7  
8 Medicine, Kyoto, Japan

9  
10 Address: 54 Shogoin-Kawahara-cho, Sakyo-ku, Kyoto 606-8507 Japan

11  
12 Email: taketaka@kuhp.kyoto-u.ac.jp

13  
14 TEL: +81-75-751-4255; FAX: +81-75-751-3299

15  
16  
17  
18  
19 **Total word count of the manuscript: 3356**  
20  
21  
22  
23  
24  
25  
26  
27  
28  
29  
30  
31  
32  
33  
34  
35  
36  
37  
38  
39  
40  
41  
42  
43  
44  
45  
46  
47  
48  
49  
50  
51  
52  
53  
54  
55  
56  
57  
58  
59  
60

## 1 Abstract

2 **Objectives:** To evaluate changes in demographics, clinical practices, and long-term clinical  
3 outcomes of STEMI patients before and beyond 2010.

4 **Design:** Multicenter retrospective cohort study

5 **Setting:** The Coronary REvascularization Demonstrating Outcome Study in Kyoto (CREDO-  
6 Kyoto) AMI Registries Wave-1 (2005-2007, 26 centers) and Wave-2 (2011-2013, 22  
7 centers).

8 **Participants:** 9001 patients with STEMI who underwent coronary revascularization (Wave-  
9 1: 4278 patients; Wave-2: 4723 patients).

10 **Primary and secondary outcome measures:** The primary outcome was all-cause death at 3  
11 years. The secondary outcomes were cardiovascular death, cardiac death, sudden cardiac  
12 death, non-cardiovascular death, non-cardiac death, myocardial infarction, definite stent  
13 thrombosis, stroke, hospitalization for heart failure, major bleeding, target vessel  
14 revascularization, ischemia-driven target vessel revascularization, any coronary  
15 revascularization, ischemia-driven any coronary revascularization.

16 **Results:** Patients in Wave-2 were older, more often had comorbidities, and more often  
17 presented with cardiogenic shock than those in Wave-1. Patients in Wave-2 had shorter  
18 onset-to-balloon time, door-to-balloon time, and were more frequently implanted drug-  
19 eluting stents, and received guideline-directed medication than those in Wave-1. The  
20 cumulative 3-year incidence of all-cause death was not significantly different between Wave-  
21 1 and Wave-2 (15.5% and 15.7%,  $P=0.77$ ). The adjusted risk for all-cause death in Wave-2  
22 relative to Wave-1 was not significant at 3 years (HR: 0.92, 95%CI: 0.83-1.03,  $P=0.14$ ), but  
23 lower beyond 30 days (HR: 0.86, 95%CI: 0.75–0.98,  $P=0.03$ ). The adjusted risks of Wave-2  
24 relative to Wave-1 were significantly lower for definite stent thrombosis (HR 0.59, 95%CI:

1  
2  
3 1 0.43-0.81, P=0.001), and for any coronary revascularization (HR 0.75, 95%CI: 0.69-0.81,  
4  
5  
6 2 P<0.001), but higher for major bleeding (HR 1.34, 95%CI: 1.20-1.51, P=0.005).

7  
8 3 **Conclusions:** We could not demonstrate improvement in 3-year mortality risk from Wave-1  
9  
10 4 to Wave-2, but we found reduction in mortality risk beyond 30 days. We also found risk  
11  
12 5 reduction for definite stent thrombosis and any coronary revascularization, but increase in the  
13  
14 6 risk for major bleeding from Wave-1 to Wave-2.  
15  
16  
17  
18  
19  
20  
21  
22  
23  
24  
25  
26  
27  
28  
29  
30  
31  
32  
33  
34  
35  
36  
37  
38  
39  
40  
41  
42  
43  
44  
45  
46  
47  
48  
49  
50  
51  
52  
53  
54  
55  
56  
57  
58  
59  
60

For peer review only

1  
2  
3 **1 Strengths and limitations of this study**  
4  
5

6 • Evaluating changes of demographics, clinical practices, and long-term clinical outcomes  
7  
8

9  
10 3 between STEMI patients enrolled beyond 2010 and those enrolled before 2010.  
11

12 4 • Multicenter registry with large sample size enrolled consecutive patients who underwent  
13  
14

15  
16 5 revascularization for AMI  
17

18 6 • Systematic differences between two cohorts in selection of patients and collection of  
19  
20

21  
22 7 events  
23  
24

25 8  
26

27 9  
28

29 10  
30  
31  
32  
33  
34  
35  
36  
37  
38  
39  
40  
41  
42  
43  
44  
45  
46  
47  
48  
49  
50  
51  
52  
53  
54  
55  
56  
57  
58  
59  
60

## 1 **Introduction**

2 The early mortality of patients with ST-segment-elevation myocardial infarction (STEMI)  
3 has been steadily declining over the last several decades.<sup>1-5</sup> This trend appears to have been  
4 driven by many factors, including demographic change, better pharmacologic management,  
5 widespread distribution of thrombolysis and/or primary percutaneous coronary intervention  
6 (PCI), shorter door-to-balloon time, and improvement in secondary prevention.<sup>4, 6-10</sup> Several  
7 large studies had demonstrated improvement of early mortality for patients with STEMI from  
8 1990s to 2000s.<sup>1-3 10</sup> Treatment based on the updated guidelines might have further improved  
9 the clinical outcomes of STEMI patients beyond 2000s.<sup>11, 12</sup> It is currently unknown whether  
10 the changes in the guidelines have contributed to change real-world clinical practice and to  
11 improve clinical outcomes; in particular, there is a few data evaluating the long-term clinical  
12 outcomes in STEMI patients enrolled beyond 2010 compared with those enrolled before  
13 2010, when the new-generation DES was approved in Japan.<sup>10, 13-15</sup> Therefore, we sought to  
14 evaluate changes in demographics, clinical practices, and long-term clinical outcomes of  
15 STEMI patients using data from 2 large Japanese cohorts of patients with acute myocardial  
16 infarction (AMI) enrolled in 2005-2007 and 2011-2013.

## 17 **Methods**

### 18 **Study Population**

19 The Coronary REvascularization Demonstrating Outcome Study in Kyoto (CREDO-  
20 Kyoto) AMI Registries Wave-1 and Wave-2 are a series of physician-initiated, non-company  
21 sponsored, multi-center registry enrolling consecutive patients with AMI who underwent  
22 coronary revascularization, either PCI or isolated coronary artery bypass grafting (CABG),  
23 within seven days of the onset of symptoms. Wave-1 enrolled patients between January 2005  
24 and December 2007 among 26 centers (both PCI and CABG available: 20 centers, and only  
25 PCI available: 6 centers) in Japan after the introduction of drug-eluting stents (DES) in 2004  
26

7

1 (supplementary appendix A).<sup>16</sup> Wave-2 enrolled patients between January 2011 and  
2 December 2013 among 22 centers (both PCI and CABG available: 16 centers, and only PCI  
3 available: 6 centers) in Japan after approval of the new-generation DES in 2010  
4 (supplementary appendix A). We made a historical comparison on demographics, clinical  
5 practices, and long-term clinical outcomes of STEMI patients between Wave-1 and Wave-2.

6 We enrolled a total of 11899 consecutive AMI patients who had undergone  
7 coronary revascularization with PCI or isolated CABG within 7 days from onset from Wave-  
8 1 (N=5429) and Wave-2 (N=6470). In the present study, we excluded patients with refusal  
9 for study participation (Wave-1: N=9, and Wave-2: N=21), and non-ST-segment elevation  
10 myocardial infarction (NSTEMI) (Wave-1: N=875, and Wave-2: N=1720). To make Wave-1  
11 and Wave-2 comparable, we further excluded 267 patients in Wave-1 who were enrolled  
12 from 4 cardiology divisions and 5 cardiovascular surgery divisions not participating in Wave-  
13 2 and 6 patients in Wave-2 who were enrolled from 1 cardiovascular surgery division not  
14 participating in Wave-1. Finally, the current study population was 9001 patients with STEMI  
15 (Wave-1: 4278 patients and Wave-2: 4723 patients) from 22 centers (both PCI and CABG  
16 available: 15 centers, and only PCI available: 7 centers) (Figure 1).

17 The relevant institutional review boards at all participating hospitals approved the  
18 study protocols. As described previously, we waived written informed consent for both  
19 registries because of the retrospective nature of the study; however, we excluded those  
20 patients who refused participation in the study when contacted at follow-up, which is  
21 concordant with the guidelines of the Japanese Ministry of Health, Labor and Welfare<sup>17</sup>.

22

### 23 **Definitions and Clinical Outcome Measures**

24 STEMI patients were defined by the electrocardiograms as patients with  $\geq 0.1$  mV  
25 of ST-segment elevation in  $\geq 2$  limb leads or  $\geq 0.2$  mV in  $\geq 2$  contiguous precordial leads,



1  
2  
3 1 accompanied by chest pain lasting at least 30 minutes or increased serum levels of cardiac  
4  
5 2 biomarkers such as troponin and/or creatine kinase MB fraction. Baseline clinical,  
6  
7 3 angiographic and procedural characteristics were collected by the experienced clinical  
8  
9 4 research coordinators from the independent clinical research organization (Research Institute  
10  
11 5 for Production Development, Kyoto, Japan; Supplementary Appendix B) from the hospital  
12  
13 6 charts or hospital databases according to the pre-specified definitions.  
14  
15

16  
17 7 Diabetes was defined as treatment with oral hypoglycemic agents or insulin, prior  
18  
19 8 clinical diagnosis of diabetes, glycated hemoglobin level  $\geq 6.5\%$ , or non-fasting blood  
20  
21 9 glucose level  $\geq 200$  mg/dL. Left ventricular ejection fraction was measured either by contrast  
22  
23 10 left ventriculography or echocardiography. Prior stroke was defined as ischemic or  
24  
25 11 hemorrhagic stroke with neurological symptoms lasting  $>24$  hours. Peripheral vascular  
26  
27 12 disease was regarded as present when carotid, aortic, or other peripheral vascular diseases  
28  
29 13 were being treated or scheduled for surgical or endovascular interventions. Renal function  
30  
31 14 was expressed as estimated glomerular filtration rate (eGFR) calculated by the Modification  
32  
33 15 of Diet in Renal Disease formula modified for Japanese patients.<sup>18</sup>  
34  
35  
36

37  
38 16 The primary outcome measure of this study was all-cause death at 3 years. The  
39  
40 17 secondary outcome measures were cardiovascular death, cardiac death, sudden cardiac death,  
41  
42 18 non-cardiovascular death, non-cardiac death, myocardial infarction, definite stent thrombosis,  
43  
44 19 stroke, hospitalization for heart failure, major bleeding, target vessel revascularization,  
45  
46 20 ischemia-driven target vessel revascularization, any coronary revascularization and ischemia-  
47  
48 21 driven any coronary revascularization. The definition of death was described in detail  
49  
50 22 previously.<sup>19,20</sup> Myocardial infarction was defined according to the definition in the Arterial  
51  
52 23 Revascularization Therapy Study (ARTS)<sup>21</sup>, and Only Q-wave myocardial infarction was  
53  
54 24 regarded as myocardial infarction when it occurred within 7 days of the index procedure.<sup>22</sup>  
55  
56 25 Definite stent thrombosis was defined according to the Academic Research Consortium  
57  
58  
59  
60

1 (ARC) definition.<sup>23</sup> Stroke during follow up was defined as ischemic or hemorrhagic stroke  
2 requiring hospitalization with symptoms lasting >24 hours. Hospitalization for heart failure  
3 was defined as hospitalization due to worsening heart failure requiring intravenous drug  
4 therapy. Major bleeding was defined as the global utilization of streptokinase and tissue  
5 plasminogen activator for occluded coronary arteries (GUSTO) moderate/severe bleeding.<sup>22</sup>  
6<sup>24</sup> TVR was defined as either PCI or CABG related to the original target vessel. Any coronary  
7 revascularization was defined as either PCI or CABG for any reason. Scheduled staged  
8 coronary revascularization procedures performed within 3 months of the initial procedure  
9 were not regarded as follow-up events, but included in the index procedure. Duration of dual  
10 antiplatelet therapy (DAPT) was left to the discretion of each attending physician. Persistent  
11 discontinuation of DAPT was defined as withdrawal of either thienopyridines or aspirin for at  
12 least 2 months.

### 14 **Data Collection and Follow-up**

15 The methods for collecting follow-up information were described in detail  
16 previously<sup>17</sup>. Follow-up started at the time of revascularization for STEMI and was censored  
17 at 3 years after the index procedure to ensure >90% of clinical follow-up rate in both Wave-1  
18 and Wave-2. Complete 3-year follow-up information was obtained for 96.2% of patients in  
19 Wave-1, and 93.2% of patients in Wave-2, respectively. Death, myocardial infarction, stroke  
20 and major bleeding were adjudicated by the clinical event committee (Supplementary  
21 Appendix C).

### 23 **Statistical Analysis**

24 We expressed continuous variables as mean  $\pm$  standard deviation (SD) or median  
25 with interquartile range (IQR) and used the Student's t-test or Wilcoxon rank sum test based

1 on their distributions for comparing continuous variables. We expressed categorical variables  
2 as frequencies and percentages and used  $\chi^2$  test for comparing categorical variables. To  
3 calculate the survival functions, follow-up periods were separately calculated for each  
4 outcome with censoring due to death or the last visit. The non-fatal outcomes other than the  
5 analyzed outcomes in the survival analyses were ignored. Cumulative incidence was  
6 estimated by the Kaplan-Meier method and differences were assessed with the log-rank test.  
7 To estimate the overall and cause-specific hazard ratio (HR) and their 95% confidence  
8 intervals (CI) of Wave-2 compared to Wave-1, we used multivariable Cox proportional  
9 hazard models by incorporating the 17 clinically relevant factors listed in Table 1. The  
10 variables did not include the factors related to management during the index hospitalization,  
11 because differences in management converged into the changes between Wave-1 and Wave  
12 2. Continuous risk-adjusting variables were dichotomized according to the clinically  
13 meaningful reference values to make proportional hazard assumptions robust and to be  
14 consistent with previous reports.<sup>17, 25</sup> We assessed proportional hazard assumptions for the  
15 risk-adjusting variables on the plots of log (time) versus log [-log (survival)] stratified by the  
16 variable, and verified the assumptions were acceptable for all variables. The missing values  
17 for the risk-adjusting variables were imputed as “normal” in the binary classification, because  
18 data should have been available if abnormalities were suspected. We performed subgroup  
19 analysis for major bleeding stratified by the Academic Research Consortium High Bleeding  
20 Risk (ARC-HBR) criteria.<sup>26</sup> We conducted landmark analyses for all-cause death and major  
21 bleeding within and beyond 30 days to distinguish perioperative and non-perioperative  
22 events.

23 All analyses were performed using R version 3.6.1 (R Foundation for Statistical  
24 Computing, Vienna, Austria). All reported P values were two-tailed, and P values less than  
25 0.05 were considered statistically significant.

## 1 Patient and public involvement

2 In this study, patients were not involved in the design, or conduct, or reporting, or  
3 dissemination plans of our research

## 4 Results

### 5 Clinical and Procedural Characteristics

6 Patients in Wave-2 were older and were more often living alone than those in  
7 Wave-1. Patients in Wave-2 more often had diabetes, end-stage renal failure, prior stroke,  
8 peripheral vascular disease, prior PCI, and malignancy, and less often had ejection fraction  
9  $\leq 40\%$ , and current smoking than those in Wave-1 (Table 1).

10 Regarding presentation, Wave-2 as compared with Wave-1 included more patients  
11 who directly admitted to the participating centers without inter-facility transfer, and who  
12 presented with cardiogenic shock and/or Killip class III/IV. Regarding angiographic  
13 characteristics, the prevalence of left anterior descending artery culprit was not different  
14 between Wave-1 and Wave-2. Patients in Wave-2 more often had multivessel disease than  
15 those in Wave-1 (Table 1).

16 Regarding procedural characteristics, onset-to-balloon time and door-to-balloon  
17 time were significantly shorter in Wave-2 than in Wave-1. Prevalence of transradial approach  
18 increased significantly, but only slightly, from Wave-1 to Wave-2. Prevalence of DES use  
19 was much higher in Wave-2 than in Wave-1, with new-generation DES use in the vast  
20 majority of DES cases in Wave-2 (Table 1). Intra-aortic balloon pumping was more often  
21 used in Wave-2 than in Wave-1 (Table 1).

22 In terms of baseline medications, patients in Wave-2 more often took  
23 thienopyridine, statins, beta-blockers, angiotensin-converting enzyme inhibitors/angiotensin  
24 receptor blockers, and proton pump inhibitors than those in Wave-1, while patients in Wave-  
25

1  
2  
3 1 2 less often took cilostazol than those in Wave-1. The prevalence of high-intensity statins  
4  
5 2 therapy was very low in both Wave-1 and Wave-2. Regarding the kind of thienopyridine, the  
6  
7 3 vast majority of patients in Wave-1 took ticlopidine, while the vast majority of patients in  
8  
9 4 Wave-2 took clopidogrel (Table 1).  
10  
11  
12 5

## 6 **Clinical Outcomes**

7 The cumulative 3-year incidence of all-cause death was not significantly different  
8  
9 8 between Wave-1 and Wave-2 (15.5% versus 15.7%, log-rank  $P=0.77$ ) (Table 2, and Figure  
10  
11 2A). The adjusted risk of Wave-2 relative to Wave-1 remained insignificant for all-cause  
12  
13 9 death (HR: 0.92, 95%CI: 0.83–1.03,  $P=0.14$ ) (Table 2). In the 30-day landmark analysis,  
14  
15 10 cumulative incidence of all-cause death was not significantly different between Wave-1 and  
16  
17 11 Wave-2 both within 30 days (5.5% versus 5.9%, log-rank  $P=0.37$ ), and beyond 30 days  
18  
19 12 (10.6% versus 10.4%, log-rank  $P=0.74$ ). However, after adjusting confounders, the lower  
20  
21 13 mortality risk of Wave-2 relative to Wave-1 was significant beyond 30 days after index  
22  
23 14 procedure (HR: 0.86, 95%CI: 0.75–0.98,  $P=0.03$ ), although it was not significant within 30  
24  
25 15 days (HR: 1.04, 95%CI: 0.87–1.23,  $P=0.69$ ) (Supplementary figure 1). The results of the 30-  
26  
27 16 day landmark analysis were consistent in patients with and without cardiogenic shock  
28  
29 17 (Supplementary figure I).  
30  
31 18  
32  
33  
34  
35  
36  
37  
38  
39  
40  
41  
42  
43

44 19 The lower crude and adjusted risks of Wave-2 relative to Wave-1 were significant  
45  
46 20 for definite stent thrombosis and any coronary revascularization, while those were  
47  
48 21 insignificant for cardiovascular death, myocardial infarction, and stroke (Table 2, Figure 2B,  
49  
50 22 Figure 3).  
51  
52  
53

54 23 Meanwhile, the cumulative 3-year incidence of major bleeding was significantly  
55  
56 24 higher in Wave-2 than in Wave-1 (16.5% and 12.0%, log-rank  $P<0.001$ ) (Table 2, and Figure  
57  
58 25 3). The excess adjusted risk of Wave-2 relative to Wave-1 remained significant for major  
59  
60

1  
2  
3 1 bleeding (HR: 1.34, 95%CI: 1.20–1.51, P=0.005) (Table 2). In the 30-day landmark analysis,  
4  
5 2 the excess crude and adjusted risks of Wave-2 relative to Wave-1 for major bleeding were  
6  
7 3 significant both within 30 days and beyond 30 days (Supplementary figure II). In the  
8  
9 4 subgroup analysis, the higher risk of Wave-2 relative to Wave-1 for major bleeding was  
10  
11 5 consistent in patients with and without ARC-HBR (Supplementary figure III). The  
12  
13 6 cumulative incidence of persistent DAPT discontinuation was significantly lower in Wave-2  
14  
15 7 than in Wave-1, indicating significantly longer DAPT duration in Wave-2 than in Wave-1  
16  
17 8 (Supplementary figure IV).  
18  
19  
20  
21  
22  
23

## 24 10 **Discussion**

25  
26 11 The main findings of this study were as follows; 1) Regarding demographics,  
27  
28 12 STEMI patients in Wave-2 were older, more often had comorbidities, and more often  
29  
30 13 presented with serious hemodynamic conditions than those in Wave-1; 2) Regarding clinical  
31  
32 14 practice, patients in Wave-2 had shorter onset-to-balloon time and door-to-balloon time, were  
33  
34 15 more frequently treated with DES, and more often received guideline-directed medical  
35  
36 16 therapy at baseline, and longer duration of DAPT during follow-up than those in Wave-1; 3)  
37  
38 17 The 3-year adjusted risks of patients in Wave-2 relative to those in Wave-1 were not  
39  
40 18 significantly different for all-cause death, myocardial infarction, and stroke, and significantly  
41  
42 19 lower for definite stent thrombosis and any coronary revascularization, but significantly  
43  
44 20 higher for major bleeding; 4) We witnessed a lower adjusted mortality risk of Wave-2  
45  
46 21 relative to Wave-1 beyond 30 days, but not within 30 days.  
47  
48  
49

50  
51 22 There was scarce of data evaluating demographics, clinical practices, and long-term  
52  
53 23 clinical outcomes in STEMI patients enrolled beyond 2010 compared with those enrolled  
54  
55 24 before 2010.<sup>10, 27</sup> In the present study, we could not demonstrate significant improvement in  
56  
57 25 mortality risk from Wave-1 to Wave-2. The mortality rates at 30 days were still around 5-6%  
58  
59  
60

1 in both Wave-1 and Wave-2, which was in line with the previous studies.<sup>28,29</sup> It was true that  
2 patients in Wave-2 were older and sicker than those in Wave-1. However, even the adjusted  
3 analysis did not suggest improvement in 30-day mortality risk from Wave-1 to Wave-2. We  
4 did observe significantly shorter onset-to-balloon time and door-to-balloon time with less  
5 frequent inter-facility transfer, and more frequent use of DES in Wave-2 than in Wave-1.  
6 However, these changes in clinical practice did not lead to improvement in 30-day mortality  
7 rate. Further shortening of onset-to-balloon time, more widespread use of transradial  
8 approach, and improved management of cardiogenic shock might be important to improve  
9 30-day mortality rate.<sup>16,30-37</sup>

10 On the other hand, beyond 30 days after the index procedure, we found a  
11 significantly lower adjusted mortality risk of patients in Wave-2 relative to those in Wave-1.  
12 The changes in clinical practices that might have contributed to lower mortality risk in Wave-  
13 2 relative to Wave-1 included shorter onset-to-balloon time, introduction of new-generation  
14 DES, and higher prevalence of guideline-directed medications use, particularly statins.  
15 Indeed, in the present study, the rates of definite stent thrombosis and any coronary  
16 revascularization were significantly lower in Wave-2 than in Wave-1, which was in line with  
17 the previous study comparing new-generation DES with first-generation DES.<sup>38</sup> Moreover,  
18 we did find substantial increase in the prevalence of statins use. Nevertheless, the prescription  
19 rate of high-intensity statin therapy was extremely low in both Wave-1 and Wave-2. The  
20 efficacy of high-intensity statin therapy has been firmly established in preventing  
21 cardiovascular events in patients with coronary artery disease.<sup>39,40</sup> We should make every  
22 effort to promote wider penetration of high-intensity statins therapy in Japan.

23 Meanwhile, we have demonstrated that the cumulative 3-year incidence of major  
24 bleeding was significantly higher in Wave-2 than in Wave-1. Patients in Wave-2 were older  
25 and sicker than those in Wave-1. However, even after adjusting confounders, the excess risk



1 of Wave-2 relative to Wave-1 remained significant for major bleeding. Moreover, the excess  
2 bleeding risk of Wave-2 relative to Wave-1 was significant regardless of ARC-HBR.  
3 Furthermore, the excess bleeding risk of Wave-2 relative to Wave-1 was significant both  
4 within 30 days and beyond 30 days. One of the reasons for the higher bleeding risk within 30  
5 days in Wave-2 than in Wave-1 might be the different types of thienopyridine used in Wave-  
6 1 and Wave-2. In Wave-1, the vast majority of patients took ticlopidine 100 mg twice daily as  
7 the standard dose in Japan, which was much lower than the dose used globally (250 mg twice  
8 daily), while in Wave-2, the vast majority of patients took clopidogrel 75 mg once daily,  
9 which was the the dose used globally. The 30-day rate of major bleeding in Wave-2 was  
10 substantial (Entire cohort: 9.8%, ARC-HBR: 14.8%, and non-ARC-HBR: 5.4%), warranting  
11 to explore the optimal antiplatelet regimen in STEMI patients minimizing bleeding events  
12 while maintaining efficacy in preventing thrombotic events. For the higher bleeding risk  
13 beyond 30 days in Wave-2 than in Wave-1, one of the reasons in addition to the difference in  
14 the types of thienopyridine might be the longer DAPT duration in Wave-2 than in Wave-1.  
15 Recent studies have suggested clinical benefit with very short DAPT after PCI in reducing  
16 major bleeding without increase in cardiovascular events, although STEMI patients  
17 constituted only a small proportion in the STOPDAPT-2 (ShorT and OPTimal duration of  
18 Dual AntiPlatelet Therapy after everolimus-eluting cobalt-chromium stent-2) trial, and were  
19 excluded in the TWILIGHT (Ticagrelor with Aspirin or Alone in High-Risk Patients after  
20 Coronary Intervention) trial.<sup>41, 42</sup> We should continue to pursue the optimal DAPT duration  
21 and optimal maintenance antithrombotic regimen in STEMI patients. Our study was based on  
22 the multicenter registry with large sample size enrolled consecutive patients who underwent  
23 revascularization for AMI and the follow-up rate was high enough. Therefore, we believe our  
24 findings should be applicable in Japan or other similar settings outside Japan, but the changes



1  
2  
3 1 in clinical pictures of STEMI should be investigated in other settings with different  
4  
5 2 healthcare systems.  
6  
7  
8  
9 3

#### 11 4 **Limitations**

12  
13  
14 5 There are several limitations of this study. First, historical comparison should result in  
15  
16 6 differences in selection of patients and collection of events, although we were careful in using  
17  
18 7 data only from those centers that participated in both Wave-1 and Wave-2, standardizing the  
19  
20 8 follow-up duration at 3 years, and adopting the identical methodology for baseline and  
21  
22 9 follow-up data collection, and definitions of baseline characteristics and clinical outcome  
23  
24 10 measures in Wave-1 and Wave-2. We could not deny the possibility of ascertainment bias for  
25  
26 11 myocardial infarction, although we adopted the identical definition of myocardial infarction  
27  
28 12 in Wave-1 and Wave-2. The less widespread use of troponin for the diagnosis of myocardial  
29  
30 13 infarction in Wave-1 compared with Wave-2 might have underestimated the incidence of  
31  
32 14 myocardial infarction in Wave-1, as reflected by the fact that there were much larger number  
33  
34 15 of patients with NSTEMI in Wave-2 than in Wave-1. Moreover, we could not deny the  
35  
36 16 possibility of ascertainment bias for major bleeding, although we adopted the identical  
37  
38 17 definition in Wave-1 and Wave-2. It could be possible that more major bleeding events were  
39  
40 18 recorded in the hospital charts due to the growing interest in bleeding events in later time  
41  
42 19 period. Second, the incidence of various end-points during 3-year follow-up is probably  
43  
44 20 overestimated, because not accounting for competing risks. Third, we chose several outcomes  
45  
46 21 as secondary outcomes carrying the risk of multiple comparisons. Fourth, we only included  
47  
48 22 patients who underwent coronary revascularization, which might have lead to selection bias.  
49  
50 23 However, it is quite rare for a STEMI patient not undergoing primary PCI. Finally, residual  
51  
52 24 unmeasured confounders might exist.  
53  
54  
55  
56  
57  
58  
59  
60

1

2 **Conclusions**

3 We could not demonstrate improvement in 3-year mortality risk from Wave-1 to Wave-2, but  
4 we found significant reduction in mortality risk beyond 30 days. We also found significant  
5 risk reduction for definite stent thrombosis and any coronary revascularization, but increase  
6 in the risk for major bleeding from Wave-1 to Wave-2.

7

8

For peer review only

**Contributors:**

T.Kimura conceptualized the CREDO-Kyoto AMI Registry. YT, prepared the original draft of the manuscript. H.Shiomi, TM, T.Kimura reviewed and edited the the original draft of the manuscript. YT, H.Shiomi, Y.Yoshikawa, YMN, K.Yamamoto, K.Yamaji curated data. YT, TM, T.Kimura constructed methodology for this study. YT, TM performed the statistical analysis. H.Shiomi, TM, RT, K.Yamaji, JT, Hirotoishi Watanabe, SS, MI, Teruki Takeda, MS, NE, KI, TI, Toshihiro Tamura, TO, ES, TY, H.Sakamoto, KA, YS, YF, YS, YN, KK, T.Komiya, KM, T.Kimura are investigators of the CREDO-Kyoto AMI Registry. YT, H.Shiomi, YY, YMN, K.Yamamoto, ETK, EY, Y.Yamashita, MF, Hiroki Watanabe, HY, KN assessed and validated events within the CREDO-Kyoto AMI Registry. T.Kimura is the Guarantor.

**Competing interest statement:**

All authors have completed the Unified Competing Interest form and declare: Dr. Shiomi reports personal fees from Abbott Vascular, Boston Scientific, and Daiichi Sankyo. Dr. Morimoto reports lecturer's fees from Bayer, Daiichi Sankyo, Japan Lifeline, Kyocera, Mitsubishi Tanabe, Novartis, and Toray; the manuscript fees from Bristol-Myers Squibb and Kowa; served advisory boards for Asahi Kasei, Boston Scientific, Bristol-Myers Squibb, and Sanofi. Dr. Kato reports grant from Ono Pharmaceutical, and reports personal fees from Daiichi Sankyo, AstraZeneca, Bristol-Myers Squibb, Tanabe-Mitsubishi Pharma, Ono Pharmaceutical, MSD KK, Pfizer. Dr. Ehara reports personal fees from Abbott Vascular, Medtronic, Terumo, Bayer, Boston Scientific, Daiichi-Sankyo, Edwards Lifescience, Pfizer, Bristol Myers Squibb, Takeda, Boehringer Ingelheim. Dr. Furukawa reports personal fees from Daiichi Sankyo, Bayer, Sanofi, Kowa, Pfizer, Bristol-Myers Squibb, Otsuka Pharmaceutical, Sumitomo Dainippon Pharma, Takeda and Ono Pharmaceutical. Dr.

1 Nakagawa reports grant from Abbott Vascular and Boston Scientific, and reports personal  
2 fees from Abbott Vascular, Bayer, Boston Scientific, Bristol-Myers Squibb, Daiichi Sankyo.  
3 Dr. Kimura reports personal fees from Abbott Vascular, MSD, Eisai, Edwards Lifescience,  
4 Ono Pharmaceutical, Tsumura, Medical Review, Kowa, Sanofi, Daiichi Sankyo, Takeda  
5 Pharmaceutical, Pharmaceuticals and Medical Devices Agency, Abiomed, Bayer, Bristol-  
6 Myers Squibb, Boston Scientific, Lifescience, Toray, Astellas Amgen Biopharma, Astellas,  
7 AstraZeneca, Otsuka Pharmaceutical, OrbusNeich, MSD Life Science Foundation, Public  
8 Health Research Foundation, Chugai Pharmaceutical, Boehringer Ingelheim, Japan Society  
9 for the Promotion of Science, Interscience, Philips, Kowa Pharmaceutical, Mitsubishi Tanabe  
10 Pharma, Terumo, Novartis Pharma, Sumitomo Dainippon Pharma.

11  
12 **Funding:**

13 This study was supported by an educational grant from the Research Institute for Production  
14 Development (Kyoto, Japan) and the Pharmaceuticals and Medical Devices Agency (PMDA)  
15 in Japan (Tokyo, Japan). Grant numbers were not applicable.

16  
17 **Data sharing statement:**

18 All data relevant to the study are included in the article or uploaded as supplementary  
19 information.

## 1      1      **References**

- 2      1.      Fox KA, Steg PG, Eagle KA, et al. Decline in rates of death and heart failure in  
3      acute coronary syndromes, 1999-2006. *JAMA*. 2007;297:1892-900.
- 4      2.      Rogers WJ, Frederick PD, Stoehr E, et al. Trends in presenting characteristics and  
5      hospital mortality among patients with ST elevation and non-ST elevation myocardial  
6      infarction in the National Registry of Myocardial Infarction from 1990 to 2006. *Am Heart J*.  
7      2008;156:1026-34.
- 8      3.      Rosamond WD, Chambless LE, Heiss G, et al. Twenty-two-year trends in incidence  
9      of myocardial infarction, coronary heart disease mortality, and case fatality in 4 US  
10      communities, 1987-2008. *Circulation*. 2012;125:1848-57.
- 11      4.      Yeh RW, Sidney S, Chandra M, et al. Population trends in the incidence and  
12      outcomes of acute myocardial infarction. *N Engl J Med*. 2010;362:2155-65.
- 13      5.      Puymirat E, Simon T, Steg PG, et al. Association of changes in clinical  
14      characteristics and management with improvement in survival among patients with ST-  
15      elevation myocardial infarction. *JAMA*. 2012;308:998-1006.
- 16      6.      Stolt Steiger V, Goy JJ, Stauffer JC, et al. Significant decrease in in-hospital  
17      mortality and major adverse cardiac events in Swiss STEMI patients between 2000 and  
18      December 2007. *Swiss Med Wkly*. 2009;139:453-7.
- 19      7.      Puymirat E, Schiele F, Steg PG, et al. Determinants of improved one-year survival in  
20      non-ST-segment elevation myocardial infarction patients: insights from the French FAST-MI  
21      program over 15 years. *Int J Cardiol*. 2014;177:281-6.
- 22      8.      Jernberg T, Johanson P, Held C, et al. Association between adoption of evidence-  
23      based treatment and survival for patients with ST-elevation myocardial infarction. *JAMA*.  
24      2011;305:1677-84.

- 1  
2  
3 1 9. Gale CP, Allan V, Cattle BA, et al. Trends in hospital treatments, including  
4  
5 2 revascularisation, following acute myocardial infarction, 2003-2010: a multilevel and relative  
6  
7 3 survival analysis for the National Institute for Cardiovascular Outcomes Research (NICOR).  
8  
9 4 *Heart*. 2014;100:582-9.
- 10 5 10. Puymirat E, Simon T, Cayla G, et al. Acute Myocardial Infarction: Changes in  
11  
12 6 Patient Characteristics, Management, and 6-Month Outcomes Over a Period of 20 Years in  
13  
14 7 the FAST-MI Program (French Registry of Acute ST-Elevation or Non-ST-Elevation  
15  
16 8 Myocardial Infarction) 1995 to 2015. *Circulation*. 2017;136:1908-1919.
- 17 9 11. O'Gara PT, Kushner FG, Ascheim DD, et al. 2013 ACCF/AHA guideline for the  
18  
19 10 management of ST-elevation myocardial infarction: executive summary: a report of the  
20  
21 11 American College of Cardiology Foundation/American Heart Association Task Force on  
22  
23 12 Practice Guidelines. *J Am Coll Cardiol*. 2013;61:485-510.
- 24 13 12. Ibanez B, James S, Agewall S, et al. 2017 ESC Guidelines for the management of  
25  
26 14 acute myocardial infarction in patients presenting with ST-segment elevation: The Task  
27  
28 15 Force for the management of acute myocardial infarction in patients presenting with ST-  
29  
30 16 segment elevation of the European Society of Cardiology (ESC). *Eur Heart J*. 2018;39:119-  
31  
32 17 177.
- 33 18 13. Eagle KA, Goodman SG, Avezum A, et al. Practice variation and missed  
34  
35 19 opportunities for reperfusion in ST-segment-elevation myocardial infarction: findings from  
36  
37 20 the Global Registry of Acute Coronary Events (GRACE). *Lancet*. 2002;359:373-7.
- 38 21 14. Fox KA, Goodman SG, Anderson FA, Jr., et al. From guidelines to clinical practice:  
39  
40 22 the impact of hospital and geographical characteristics on temporal trends in the management  
41  
42 23 of acute coronary syndromes. The Global Registry of Acute Coronary Events (GRACE). *Eur*  
43  
44 24 *Heart J*. 2003;24:1414-24.

- 1  
2  
3 1 15. Carruthers KF, Dabbous OH, Flather MD, et al. Contemporary management of acute  
4  
5 2 coronary syndromes: does the practice match the evidence? The global registry of acute  
6  
7 3 coronary events (GRACE). *Heart*. 2005;91:290-8.  
8  
9  
10 4 16. Shiomi H, Nakagawa Y, Morimoto T, et al. Association of onset to balloon and door  
11  
12 5 to balloon time with long term clinical outcome in patients with ST elevation acute  
13  
14 6 myocardial infarction having primary percutaneous coronary intervention: observational  
15  
16 7 study. *Bmj*. 2012;344:e3257.  
17  
18  
19 8 17. Takeji Y, Shiomi H, Morimoto T, et al. Demographics, practice patterns and long-  
20  
21 9 term outcomes of patients with non-ST-segment elevation acute coronary syndrome in the  
22  
23 10 past two decades: the CREDO-Kyoto Cohort-2 and Cohort-3. *BMJ Open*. 2021;11:e044329.  
24  
25  
26 11 18. Matsuo S, Imai E, Horio M, et al. Revised equations for estimated GFR from serum  
27  
28 12 creatinine in Japan. *Am J Kidney Dis*. 2009;53:982-92.  
29  
30  
31 13 19. Natsuaki M, Morimoto T, Shiomi H, et al. Application of the Modified High  
32  
33 14 Bleeding Risk Criteria for Japanese Patients in an All-Comers Registry of Percutaneous  
34  
35 15 Coronary Intervention - From the CREDO-Kyoto Registry Cohort-3. *Circ J*. 2020.  
36  
37  
38 16 20. Matsumura-Nakano Y, Shiomi H, Morimoto T, et al. Comparison of Outcomes of  
39  
40 17 Percutaneous Coronary Intervention Versus Coronary Artery Bypass Grafting Among  
41  
42 18 Patients With Three-Vessel Coronary Artery Disease in the New-Generation Drug-Eluting  
43  
44 19 Stents Era (From CREDO-Kyoto PCI/CABG Registry Cohort-3). *Am J Cardiol*. 2021.  
45  
46  
47 20 21. Serruys PW, Unger F, Sousa JE, et al. Comparison of coronary-artery bypass surgery  
48  
49 21 and stenting for the treatment of multivessel disease. *N Engl J Med*. 2001;344:1117-24.  
50  
51  
52 22 22. Kimura T, Morimoto T, Furukawa Y, et al. Long-term safety and efficacy of  
53  
54 23 sirolimus-eluting stents versus bare-metal stents in real world clinical practice in Japan.  
55  
56 24 *Cardiovasc Interv Ther*. 2011;26:234-45.  
57  
58  
59  
60

- 1  
2  
3 1 23. Cutlip DE, Windecker S, Mehran R, et al. Clinical end points in coronary stent trials:  
4 a case for standardized definitions. *Circulation*. 2007;115:2344-51.  
5  
6 2  
7 3 24. An international randomized trial comparing four thrombolytic strategies for acute  
8 myocardial infarction. *N Engl J Med*. 1993;329:673-82.  
9  
10 4  
11 5 25. Kimura T, Morimoto T, Furukawa Y, et al. Long-term outcomes of coronary-artery  
12 bypass graft surgery versus percutaneous coronary intervention for multivessel coronary  
13 artery disease in the bare-metal stent era. *Circulation*. 2008;118:S199-209.  
14  
15 6  
16 7 26. Urban P, Mehran R, Colleran R, et al. Defining High Bleeding Risk in Patients  
17 Undergoing Percutaneous Coronary Intervention. *Circulation*. 2019;140:240-261.  
18  
19 8  
20 9 27. Szummer K, Wallentin L, Lindhagen L, et al. Improved outcomes in patients with  
21 ST-elevation myocardial infarction during the last 20 years are related to implementation of  
22 evidence-based treatments: experiences from the SWEDHEART registry 1995-2014. *Eur*  
23 *Heart J*. 2017;38:3056-3065.  
24  
25 10  
26 11 28. Menees DS, Peterson ED, Wang Y, et al. Door-to-balloon time and mortality among  
27 patients undergoing primary PCI. *N Engl J Med*. 2013;369:901-9.  
28  
29 12  
30 13 29. Biswas S, Duffy SJ, Lefkovits J, et al. Australian Trends in Procedural  
31 Characteristics and Outcomes in Patients Undergoing Percutaneous Coronary Intervention for  
32 ST-Elevation Myocardial Infarction. *Am J Cardiol*. 2018;121:279-288.  
33  
34 14  
35 15 30. Cannon CP, Gibson CM, Lambrew CT, et al. Relationship of symptom-onset-to-  
36 balloon time and door-to-balloon time with mortality in patients undergoing angioplasty for  
37 acute myocardial infarction. *JAMA*. 2000;283:2941-7.  
38  
39 16  
40 17 31. De Luca G, Suryapranata H, Zijlstra F, et al. Symptom-onset-to-balloon time and  
41 mortality in patients with acute myocardial infarction treated by primary angioplasty. *J Am*  
42 *Coll Cardiol*. 2003;42:991-7.  
43  
44  
45  
46  
47  
48  
49  
50  
51  
52  
53  
54  
55  
56  
57  
58  
59  
60



- 1  
2  
3 1 32. McNamara RL, Wang Y, Herrin J, et al. Effect of door-to-balloon time on mortality  
4  
5 2 in patients with ST-segment elevation myocardial infarction. *J Am Coll Cardiol*.  
6  
7 3 2006;47:2180-6.  
8  
9  
10 4 33. Maeng M, Nielsen PH, Busk M, et al. Time to treatment and three-year mortality  
11  
12 5 after primary percutaneous coronary intervention for ST-segment elevation myocardial  
13  
14 6 infarction-a DANish Trial in Acute Myocardial Infarction-2 (DANAMI-2) substudy. *Am J*  
15  
16 7 *Cardiol*. 2010;105:1528-34.  
17  
18 8 34. Rollando D, Puggioni E, Robotti S, et al. Symptom onset-to-balloon time and  
19  
20 9 mortality in the first seven years after STEMI treated with primary percutaneous coronary  
21  
22 10 intervention. *Heart*. 2012;98:1738-42.  
23  
24  
25 11 35. Park J, Choi KH, Lee JM, et al. Prognostic Implications of Door-to-Balloon Time  
26  
27 12 and Onset-to-Door Time on Mortality in Patients With ST -Segment-Elevation Myocardial  
28  
29 13 Infarction Treated With Primary Percutaneous Coronary Intervention. *J Am Heart Assoc*.  
30  
31 14 2019;8:e012188.  
32  
33  
34 15 36. Nakatsuma K, Shiomi H, Morimoto T, et al. Inter-Facility Transfer vs. Direct  
35  
36 16 Admission of Patients With ST-Segment Elevation Acute Myocardial Infarction Undergoing  
37  
38 17 Primary Percutaneous Coronary Intervention. *Circ J*. 2016;80:1764-72.  
39  
40  
41 18 37. Gandhi S, Kakar R and Overgaard CB. Comparison of radial to femoral PCI in acute  
42  
43 19 myocardial infarction and cardiogenic shock: a systematic review. *J Thromb Thrombolysis*.  
44  
45 20 2015;40:108-17.  
46  
47  
48 21 38. Toyota T, Shiomi H, Morimoto T, et al. Meta-analysis of long-term clinical  
49  
50 22 outcomes of everolimus-eluting stents. *Am J Cardiol*. 2015;116:187-94.  
51  
52  
53 23 39. Taguchi I, Iimuro S, Iwata H, et al. High-Dose Versus Low-Dose Pitavastatin in  
54  
55 24 Japanese Patients With Stable Coronary Artery Disease (REAL-CAD): A Randomized  
56  
57 25 Superiority Trial. *Circulation*. 2018;137:1997-2009.  
58  
59  
60

- 1  
2  
3 1 40. Baigent C, Blackwell L, Emberson J, et al. Efficacy and safety of more intensive  
4  
5 2 lowering of LDL cholesterol: a meta-analysis of data from 170,000 participants in 26  
6  
7 3 randomised trials. *Lancet*. 2010;376:1670-81.  
8  
9  
10 4 41. Watanabe H, Domei T, Morimoto T, et al. Effect of 1-Month Dual Antiplatelet  
11  
12 5 Therapy Followed by Clopidogrel vs 12-Month Dual Antiplatelet Therapy on Cardiovascular  
13  
14 6 and Bleeding Events in Patients Receiving PCI: The STOPDAPT-2 Randomized Clinical  
15  
16 7 Trial. *JAMA*. 2019;321:2414-2427.  
17  
18  
19 8 42. Mehran R, Baber U, Sharma SK, et al. Ticagrelor with or without Aspirin in High-  
20  
21 9 Risk Patients after PCI. *N Engl J Med*. 2019;381:2032-2042.  
22  
23  
24 10  
25  
26  
27  
28  
29  
30  
31  
32  
33  
34  
35  
36  
37  
38  
39  
40  
41  
42  
43  
44  
45  
46  
47  
48  
49  
50  
51  
52  
53  
54  
55  
56  
57  
58  
59  
60

1  
2  
3 **1 Footnotes**

4  
5 **2 Acknowledgments:**

6  
7  
8 3 We appreciate the support and collaboration of the coinvestigators participating in the  
9  
10 4 CREDO Kyoto PCI/CABG Registry Wave-1 and the CREDO Kyoto PCI/CABG Registry  
11  
12 5 Wave-2. We are indebted to the outstanding effort of the clinical research coordinators for  
13  
14 6 data collection.

15  
16  
17 **7 Ethical approval:**

18  
19 8 The protocol for CREDO-Kyoto AMI Registry Wave-1 and Wave-2 were approved by the  
20  
21 9 human research ethics committees of the Kyoto University Graduate School of Medicine  
22  
23  
24 10 (E42,E2400).

25  
26 **11 Provenance and peer review:**

27  
28 12 Not commissioned; externally peer reviewed.  
29  
30  
31 13

1  
2  
3 **1 Figure legends**  
4

5  
6 2

7  
8 **3 Figure 1. Study flowchart**  
9

10 4 CREDO-Kyoto=Coronary REvascularization Demonstrating Outcome study in Kyoto;

11  
12 5 AMI=acute myocardial infarction; PCI=percutaneous coronary intervention,  
13

14 6 CABG=coronary artery bypass grafting; NSTEMI=non-ST-segment elevation myocardial  
15

16  
17 7 infarction; STEMI=ST-segment elevation myocardial infarction.  
18

19 8

20  
21 **9 Figure 2. Kaplan-Meier curves (A) for all-cause death and (B) for cardiovascular death**  
22

23  
24 **10 comparing between Wave-1 and Wave-2**  
25

26 11

27  
28 **12 Figure 3. Kaplan-Meier curves comparing between Wave-1 and Wave-2 for (A)**  
29

30 **13 myocardial infarction, (B) definite stent thrombosis, (C) major bleeding, and (D) any**  
31

32 **14 coronary revascularization**  
33

34  
35 15 Definite stent thrombosis was based on the ARC definition, and was analyzed only for  
36

37 16 patients who underwent PCI with stent implantation (3739 patients in Wave-1 and 4241  
38

39 17 patients in Wave-2).  
40

41  
42 18 Major bleeding was defined as GUSTO moderate/severe bleeding.  
43

44  
45 19 CREDO-Kyoto==Coronary REvascularization Demonstrating Outcome study in Kyoto;  
46

47 20 AMI=acute myocardial infarction; STEMI=ST-segment elevation myocardial infarction;  
48

49 21 NSTEMI=non-ST-segment elevation myocardial infarction; ARC=academic research  
50

51 22 consortium; GUSTO=global utilization of streptokinase and tissue plasminogen activator for  
52

53 23 occluded coronary arteries .  
54  
55  
56  
57  
58  
59  
60

1 **Table 1. Baseline characteristics comparing between Wave-1 and Wave-2**

|                                                          | Wave-1<br>(N=4278) | Wave-2<br>(N=4723) | P value |
|----------------------------------------------------------|--------------------|--------------------|---------|
| <b>(A) Clinical characteristics</b>                      |                    |                    |         |
| Age (years)                                              | 67.6 ± 12.2        | 68.8 ± 12.5        | <0.001  |
| Age ≥75 years*                                           | 1336 (31%)         | 1694 (36%)         | <0.001  |
| Men*                                                     | 3156 (74%)         | 3538 (75%)         | 0.23    |
| Body mass index (kg/m <sup>2</sup> )                     | 23.6 ± 3.5         | 23.7 ± 3.6         | 0.40    |
| Body mass index <25.0 kg/m <sup>2</sup> *                | 3058 (72%)         | 3269 (69%)         | 0.02    |
| Hypertension*                                            | 3343 (78%)         | 3768 (80%)         | 0.06    |
| Diabetes mellitus*                                       | 1395 (33%)         | 1664 (35%)         | 0.009   |
| on insulin therapy                                       | 205 (4.8%)         | 270 (5.7%)         | 0.06    |
| Current smoking*                                         | 1730 (40%)         | 1702 (36%)         | <0.001  |
| Heart failure*                                           | 1350 (32%)         | 1566 (33%)         | 0.11    |
| LVEF                                                     | 52.5±12.9          | 53.8±12.4          | <0.001  |
| LVEF ≤40%                                                | 596 (18%)          | 595 (14%)          | <0.001  |
| Prior PCI                                                | 364 (8.5%)         | 523 (11%)          | <0.001  |
| Prior CABG                                               | 53 (1.2%)          | 59 (1.2%)          | 1.00    |
| Prior myocardial infarction*                             | 381 (8.9%)         | 427 (9.0%)         | 0.85    |
| Prior stroke (symptomatic)*                              | 394 (9.2%)         | 521 (11%)          | 0.005   |
| Peripheral vascular disease*                             | 138 (3.2%)         | 209 (4.4%)         | 0.004   |
| eGFR<30mL/min/1.73m <sup>2</sup> , without hemodialysis* | 202 (4.7%)         | 288 (6.1%)         | 0.005   |
| Hemodialysis*                                            | 73 (1.7%)          | 131 (2.8%)         | 0.001   |
| eGFR <30 ml/min/1.73m <sup>2</sup> or hemodialysis       | 275 (6.4%)         | 419 (8.9%)         | <0.001  |
| Atrial fibrillation                                      | 418 (9.8%)         | 419 (8.9%)         | 0.15    |
| Anemia (Hemoglobin <11.0g/dl)*                           | 438 (10%)          | 531 (11%)          | 0.13    |
| Thrombocytopenia (Platelet <100×10 <sup>9</sup> /L)      | 84 (2.0%)          | 102 (2.2%)         | 0.56    |
| Chronic obstructive pulmonary disease                    | 140 (3.3%)         | 173 (3.7%)         | 0.34    |
| Liver cirrhosis                                          | 101 (2.4%)         | 101 (2.1%)         | 0.52    |
| Malignancy*                                              | 337 (7.9%)         | 516 (11%)          | <0.001  |
| <b>(B) Presentation</b>                                  |                    |                    |         |
| Living alone                                             | 509 (13%)          | 780 (17%)          | <0.001  |
| Direct admission                                         | 2215 (54%)         | 2603 (57%)         | 0.02    |
| Inter-facility transfer                                  | 1866 (44%)         | 1983 (42%)         | 0.12    |

|   |                         |                  |                 |        |
|---|-------------------------|------------------|-----------------|--------|
| 1 |                         |                  |                 |        |
| 2 |                         |                  |                 |        |
| 3 |                         |                  |                 |        |
| 4 | Killip class III/IV     | 725 (17%)        | 915 (19%)       | 0.003  |
| 5 | Cardiogenic shock       | 596 (14%)        | 757 (16%)       | 0.005  |
| 6 |                         |                  |                 |        |
| 7 | Cardiopulmonary arrest* | 142 (3.3%)       | 193 (4.1%)      | 0.06   |
| 8 | Maximum CK              | 2133 (1002-4077) | 1836 (767-3663) | <0.001 |
| 9 |                         |                  |                 |        |

### (C) Angiographic characteristics

#### Infarct related artery location:

|    |                                           |            |            |        |
|----|-------------------------------------------|------------|------------|--------|
| 13 |                                           |            |            |        |
| 14 | Left anterior descending coronary artery* | 1979 (46%) | 2191 (46%) | 0.91   |
| 15 | Left circumflex coronary artery           | 443 (10%)  | 479 (10%)  | 0.76   |
| 16 |                                           |            |            |        |
| 17 | Right coronary artery                     | 1732 (40%) | 1898 (40%) | 0.78   |
| 18 |                                           |            |            |        |
| 19 | Left main coronary artery                 | 107 (2.5%) | 172 (3.6%) | 0.002  |
| 20 |                                           |            |            |        |
| 21 | Coronary artery bypass graft              | 19 (0.4%)  | 24 (0.5%)  | 0.77   |
| 22 | Multivessel disease                       | 2222 (52%) | 2655 (56%) | <0.001 |

### (D) Procedural characteristics

|    |                                          |               |               |        |
|----|------------------------------------------|---------------|---------------|--------|
| 25 | Onset-to-balloon time (hours)            | 4.2 (2.8-7.2) | 4.0 (2.7-6.6) | <0.001 |
| 26 |                                          |               |               |        |
| 27 | Door-to-balloon time (minutes)           | 90 (60-132)   | 79 (59-110)   | <0.001 |
| 28 |                                          |               |               |        |
| 29 | Intra-aortic balloon pump use            | 738 (17%)     | 994 (21%)     | <0.001 |
| 30 | Percutaneous cardiopulmonary support use | 116 (2.7%)    | 149 (3.2%)    | 0.24   |
| 31 |                                          |               |               |        |
| 32 | PCI*                                     | 4180 (98%)    | 4625 (98%)    | 0.48   |
| 33 |                                          |               |               |        |
| 34 | Transradial approach                     | 498 (12%)     | 733 (16%)     | <0.001 |
| 35 | Transfemoral approach                    | 3432 (82%)    | 3640 (79%)    | <0.001 |
| 36 |                                          |               |               |        |
| 37 | IVUS use for the culprit lesion          | 1260 (30%)    | 2653 (57%)    | <0.001 |
| 38 |                                          |               |               |        |
| 39 | Stent use for the culprit lesion         | 3739 (89%)    | 4241 (92%)    | <0.001 |
| 40 |                                          |               |               |        |
| 41 | Bare metal stent                         | 2946 (79%)    | 1735 (41%)    | <0.001 |
| 42 | Drug-eluting stent                       | 793 (21%)     | 2506 (59%)    | <0.001 |
| 43 |                                          |               |               |        |
| 44 | Staged PCI                               | 932 (22%)     | 1018 (22%)    | 0.77   |
| 45 |                                          |               |               |        |
| 46 | Stent use including staged PCI           | 3802 (91%)    | 4295 (93%)    | 0.001  |
| 47 |                                          |               |               |        |
| 48 | Bare metal stent                         | 2542 (67%)    | 1490 (35%)    | <0.001 |
| 49 | Drug-eluting stent                       | 1260 (33%)    | 2805 (65%)    | <0.001 |
| 50 |                                          |               |               |        |
| 51 | First-generation DES use                 | 1257 (99%)    | 47 (1.7%)     | <0.001 |
| 52 |                                          |               |               |        |
| 53 | Sirolimus-eluting stent (CYPHER™)        | 1174 (93%)    | 27 (57%)      |        |
| 54 | Paclitaxel-eluting stent (TAXUS™)        | 115 (9.1%)    | 21 (45%)      |        |
| 55 |                                          |               |               |        |
| 56 | New-generation DES use                   | -             | 2776 (99%)    |        |
| 57 |                                          |               |               |        |
| 58 | Everolimus-eluting stent (XIENCE™)       | -             | 2054 (74%)    |        |
| 59 | Everolimus-eluting stent (PROMUS™)       | -             | 1616 (58%)    |        |
| 60 |                                          |               |               |        |

|    |                                             |            |            |        |
|----|---------------------------------------------|------------|------------|--------|
|    | Biolimus-eluting stent (NOBORI™)            | -          | 725 (26%)  |        |
|    | Zotarolimus-eluting stent (RESOLUTE™)       | -          | 255 (9.2%) |        |
|    | Zotarolimus-eluting stent (ENDEAVOR™)       | -          | 49 (1.8%)  |        |
| 9  | CABG                                        | 98 (2.3%)  | 98 (2.1%)  | 0.48   |
| 10 | Off pump                                    | 34 (35%)   | 43 (44%)   | 0.19   |
| 12 | ITA use                                     | 82 (84%)   | 80 (82%)   | 0.71   |
| 13 | <b>(E) Baseline Medications</b>             |            |            |        |
| 15 | Antiplatelet therapy                        |            |            |        |
| 17 | Thienopyridine                              | 3993 (93%) | 4521 (96%) | <0.001 |
| 18 | Ticlopidine                                 | 3652 (85%) | 124 (2.6%) | <0.001 |
| 20 | Clopidogrel                                 | 340 (7.9%) | 4339 (92%) | <0.001 |
| 22 | Aspirin                                     | 4209 (98%) | 4636 (98%) | 0.45   |
| 24 | Cilostazol                                  | 1501 (35%) | 116 (2.5%) | <0.001 |
| 25 | Statins                                     | 2281 (53%) | 3885 (82%) | <0.001 |
| 27 | High-intensity statins therapy <sup>§</sup> | 67 (1.6%)  | 78 (1.7%)  | 0.81   |
| 29 | Beta-blockers                               | 1747 (41%) | 2555 (54%) | <0.001 |
| 30 | ACE inhibitors/ARB                          | 3040 (71%) | 3554 (75%) | <0.001 |
| 32 | Nitrates                                    | 1269 (30%) | 832 (18%)  | <0.001 |
| 34 | Calcium channel blockers                    | 885 (21%)  | 970 (21%)  | 0.88   |
| 35 | Nicorandil                                  | 1198 (28%) | 966 (20%)  | <0.001 |
| 37 | Warfarin                                    | 495 (12%)  | 591 (13%)  | 0.18   |
| 38 | DOAC                                        | -          | 61 (1.3%)  | -      |
| 40 | Proton pump inhibitors                      | 1470 (34%) | 3505 (74%) | <0.001 |
| 42 | Histamine type-2 receptor blockers          | 1393 (33%) | 553 (12%)  | <0.001 |

1 Continuous variables were expressed as mean ± standard deviation, or median (interquartile  
2 range). Categorical variables were expressed as number (percentage).

3 There were missing values for body mass index in 341 patients (Wave-1: 232 [5.4%] and  
4 Wave-2: 109 [2.3%]), for LVEF in 1385 patients (Wave-1: 951 [22%] and Wave-2: 434  
5 [9.2%]), for eGFR in 94 patients (Wave-1: 80 [1.9%] and Wave-2: 14 [0.3%]), for  
6 hemoglobin level in 110 patients (Wave-1: 99 [2.3%] and Wave-2: 11 [0.2%]), for platelet  
7 count in 47 patients (Wave-1: 29 [0.7%] and Wave-2: 18 [0.4%]), for max CK in 91 patients  
8 (Wave-1: 39 [0.9%] and Wave-2: 52 [1.1%]),. The numbers of missing values for body mass

1 index, eGFR, hemoglobin level, and platelet count were negligibly small. The missing values  
2 for these variables were imputed as “normal” in the binary classification, because data should  
3 have been available if abnormalities were suspected. On the other hands, the missing values  
4 for LVEF were not imputed in the categorical classification, because the numbers of missing  
5 values were substantial for these variables. Onset to balloon time and door to balloon time  
6 were analyzed only for patients who underwent PCI within 24 hours of the onset of  
7 symptoms excluding nosocomial onset (onset to balloon time: 3271 patients in Wave-1 and  
8 3372 patients in Wave-2; door to balloon time: 3228 patients in Wave-1 and 3242 patients in  
9 Wave-2).

10 \*Risk-adjusting variables for the Cox proportional hazard models

11 §High-intensity statins therapy in this study was defined as the statin doses greater than or  
12 equal to atorvastatin 20 mg, pitavastatin 4 mg, or rosuvastatin 10 mg.

13 PCI=percutaneous coronary intervention; CABG=coronary artery bypass grafting;

14 ESRD=end-stage renal disease; eGFR=estimated glomerular filtration rate; ARC-HBR=

15 ARC-HBR=academic research consortium-high bleeding risk; CK=creatinine kinase;

16 ITA=internal thoracic artery; ACE inhibitor/ARB=angiotensin-converting enzyme

17 inhibitor/angiotensin receptor blocker; DOAC=direct oral anticoagulants.



1 **Table 2. Clinical outcomes comparing between Wave-1 and Wave-2**

| Endpoints                                       | Wave-1<br>(N=4278)<br>N of patients with event<br>(Cumulative 3-year incidence) | Wave-2<br>(N=4723)<br>N of patients with event<br>(Cumulative 3-year incidence) | Crude HR<br>(95% CI) | P value | Adjusted HR<br>(95% CI) | P value |
|-------------------------------------------------|---------------------------------------------------------------------------------|---------------------------------------------------------------------------------|----------------------|---------|-------------------------|---------|
| All-cause death                                 | 654 (15.5%)                                                                     | 722 (15.7%)                                                                     | 1.02 (0.91-1.13)     | 0.77    | 0.92 (0.83-1.03)        | 0.14    |
| Cardiovascular death                            | 475 (11.3%)                                                                     | 524 (11.4%)                                                                     | 1.01 (0.89-1.15)     | 0.86    | 0.93 (0.82-1.06)        | 0.26    |
| Cardiac death                                   | 448 (10.7%)                                                                     | 489 (10.7%)                                                                     | 1.00 (0.88-1.14)     | 1.00    | 0.93 (0.81-1.05)        | -       |
| Sudden cardiac death                            | 47 (1.2%)                                                                       | 45 (1.1%)                                                                       | 0.88 (0.59-1.33)     | 0.54    | 0.76 (0.50-1.15)        | -       |
| Non-cardiovascular death                        | 179 (4.7%)                                                                      | 198 (4.8%)                                                                      | 1.03 (0.84-1.26)     | 0.80    | 0.90 (0.73-1.10)        | 0.29    |
| Non-cardiac death                               | 206 (5.4%)                                                                      | 233 (5.7%)                                                                      | 1.05 (0.87-1.27)     | 0.61    | 0.91 (0.75-1.10)        | -       |
| Myocardial infarction                           | 169 (4.3%)                                                                      | 202 (4.8%)                                                                      | 1.10 (0.90-1.35)     | 0.36    | 1.04 (0.85-1.28)        | 0.72    |
| Definite stent thrombosis*                      | 81 (2.3%)                                                                       | 60 (1.5%)                                                                       | 0.65 (0.47-0.91)     | 0.01    | 0.59 (0.43-0.81)        | 0.001   |
| Stroke                                          | 191 (4.9%)                                                                      | 243 (5.7%)                                                                      | 1.17 (0.97-1.42)     | 0.10    | 1.09 (0.90-1.31)        | 0.40    |
| Hospitalization for heart failure               | 267 (7.0%)                                                                      | 305 (7.4%)                                                                      | 1.06 (0.90-1.25)     | 0.50    | 0.97 (0.82-1.14)        | 0.68    |
| Major bleeding                                  | 492 (12.0%)                                                                     | 741 (16.5%)                                                                     | 1.39 (1.25-1.56)     | <0.001  | 1.34 (1.20-1.51)        | 0.005   |
| Target vessel revascularization                 | 1017 (26.3%)                                                                    | 816 (19.5%)                                                                     | 0.70 (0.64-0.77)     | <0.001  | 0.69 (0.63-0.76)        | -       |
| Ischemia-driven target vessel revascularization | 353 (9.1%)                                                                      | 364 (8.7%)                                                                      | 0.94 (0.81-1.09)     | 0.43    | 0.92 (0.79-1.06)        | -       |
| Any coronary revascularization                  | 1277 (33.0%)                                                                    | 1112 (26.6%)                                                                    | 0.76 (0.70-0.83)     | <0.001  | 0.75 (0.69-0.81)        | -       |
| Ischemia-driven any coronary revascularization  | 472 (12.3%)                                                                     | 522 (12.6%)                                                                     | 1.02 (0.90-1.15)     | 0.80    | 0.99 (0.87-1.12)        | -       |

2 The risk of Wave-2 relative to Wave-1 was expressed as HR with 95%CI. The covariates for the multivariate Cox proportional hazard models

3 were indicated in Table 1.

4 Myocardial infarction was based on the ARTS definition.

1 \*Definite stent thrombosis was based on the ARC definition, and was analyzed only for patients who underwent PCI with stent implantation

2 (3739 patients in Wave-1 and 4241 patients in Wave-2).

3 Major bleeding was defined as GUSTO moderate/severe bleeding.

4 HR=hazard ratio; CI=confidence interval; ARTS=arterial revascularization therapy study; ARC=academic research consortium; GUSTO=global

5 utilization of streptokinase and tissue plasminogen activator for occluded coronary arteries.

6

7

**CREDO-Kyoto AMI registry Wave-1**  
**5,429 patients with AMI undergoing coronary revascularization with PCI or isolated CABG between 2005 and 2007 from 26 centers**

Refusal for study participation: N=9

Patients with NSTEMI: N=875

**Entire STEMI cohort in Wave-1: N=4,545**

Patients enrolled from centers not participating in Wave-2: N=267

**Current study population in Wave-1 from 22 centers**  
**Patients with STEMI: N=4,278**

Patients who died during 3-year follow-up: N=654

Patients who censored before 3 years: N=170

**Number of patients at risk in Wave-1 at 3 years: N=3,454**

**CREDO-Kyoto AMI Registry Wave-2**  
**6,470 patients with AMI undergoing coronary revascularization with PCI or isolated CABG between 2011 and 2013 from 22 centers**

Refusal for study participation: N=21

Patients with NSTEMI: N=1,720

**Entire STEMI cohort in Wave-2: N=4,729**

Patients enrolled from centers not participating in Wave-1: N=6

**Current study population in Wave-2 from 22 centers**  
**Patients with STEMI : N=4,723**

Patients who died during 3-year follow-up: N=722

Patients who censored before 3 years: N=316

**Number of patients at risk in Wave-2 at 3 years: N=3,685**

1  
2  
3  
4  
5  
6  
7  
8  
9  
10  
11  
12  
13  
14  
15  
16  
17  
18  
19  
20  
21  
22  
23  
24  
25  
26  
27  
28  
29  
30  
31  
32  
33  
34  
35  
36  
37  
38  
39  
40  
41  
42  
43  
44  
45  
46  
47  
48  
49  
50  
51  
52  
53  
54  
55  
56  
57  
58  
59  
60

### (A) All-cause death

### (B) Cardiovascular death

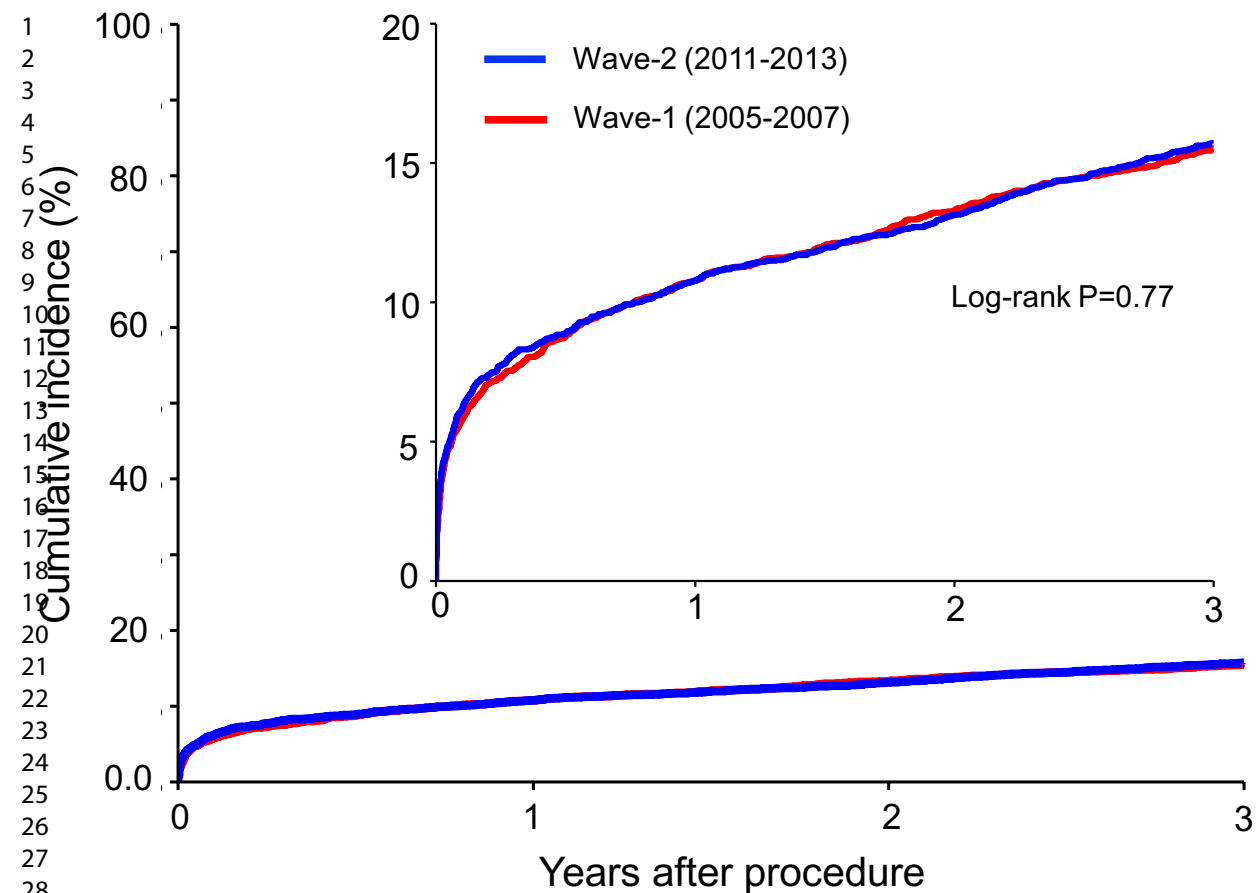

| Interval                 | 0 day | 30 days | 1 year | 2 years | 3 years |
|--------------------------|-------|---------|--------|---------|---------|
| <b>Wave-2</b>            |       |         |        |         |         |
| N of patients at risk    | 4723  | 4395    | 4041   | 3858    | 3685    |
| N of patients with event |       | 280     | 502    | 608     | 722     |
| Cumulative incidence     |       | 5.9%    | 10.8%  | 13.1%   | 15.7%   |
| <b>Wave-1</b>            |       |         |        |         |         |
| N of patients at risk    | 4278  | 4023    | 3744   | 3602    | 3454    |
| N of patients with event |       | 235     | 458    | 564     | 654     |
| Cumulative incidence     |       | 5.5%    | 10.8%  | 13.3%   | 15.5%   |

| Interval                 | 0 day | 30 days | 1 year | 2 years | 3 years |
|--------------------------|-------|---------|--------|---------|---------|
| <b>Wave-2</b>            |       |         |        |         |         |
| N of patients at risk    | 4723  | 4395    | 4041   | 3858    | 3685    |
| N of patients with event |       | 272     | 420    | 468     | 524     |
| Cumulative incidence     |       | 5.8%    | 9%     | 10.1%   | 11.4%   |
| <b>Wave-1</b>            |       |         |        |         |         |
| N of patients at risk    | 4278  | 4023    | 3744   | 3602    | 3454    |
| N of patients with event |       | 234     | 384    | 430     | 475     |
| Cumulative incidence     |       | 5.5%    | 9%     | 10.2%   | 11.3%   |

**(A) Myocardial infarction**

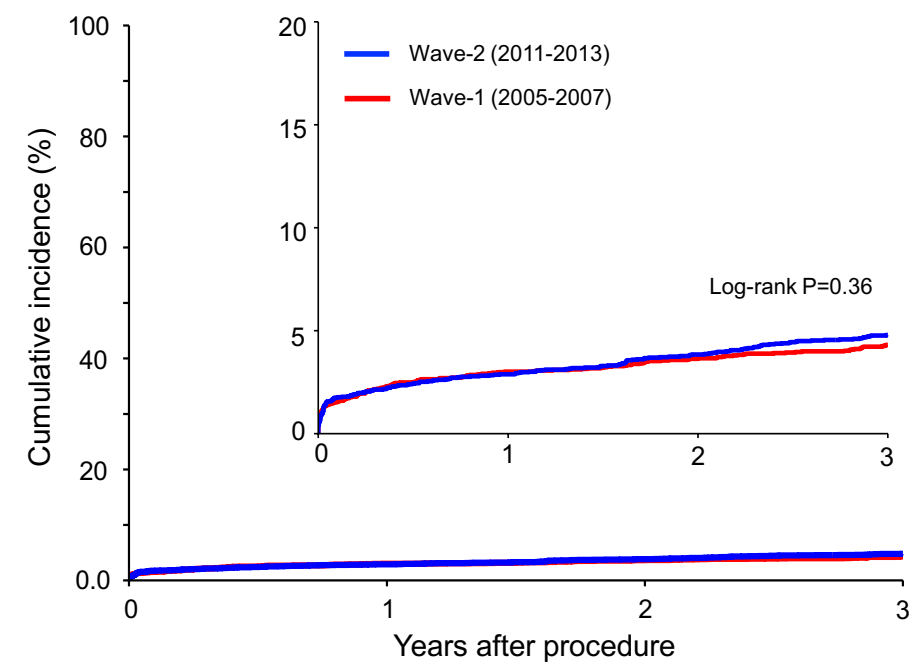

| Interval                 | 0 day | 30 days | 1 year | 2 years | 3 years |
|--------------------------|-------|---------|--------|---------|---------|
| <b>Wave-2</b>            |       |         |        |         |         |
| N of patients at risk    | 4723  | 4332    | 3940   | 3729    | 3539    |
| N of patients with event |       | 79      | 128    | 166     | 202     |
| Cumulative incidence     |       | 1.7%    | 2.9%   | 3.8%    | 4.8%    |
| <b>Wave-1</b>            |       |         |        |         |         |
| N of patients at risk    | 4278  | 3967    | 3651   | 3499    | 3337    |
| N of patients with event |       | 64      | 122    | 146     | 169     |
| Cumulative incidence     |       | 1.5%    | 3.0%   | 3.7%    | 4.3%    |

**(B) Definite stent thrombosis**

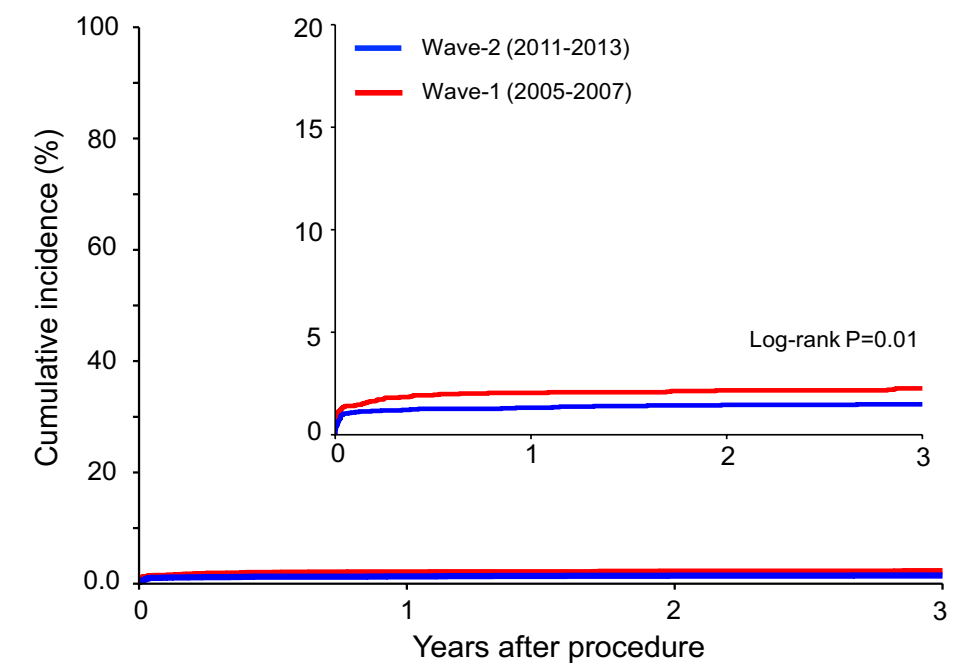

| Interval                 | 0 day | 30 days | 1 year | 2 years | 3 years |
|--------------------------|-------|---------|--------|---------|---------|
| <b>Wave-2</b>            |       |         |        |         |         |
| N of patients at risk    | 4241  | 3945    | 3642   | 3476    | 3335    |
| N of patients with event |       | 45      | 54     | 59      | 60      |
| Cumulative incidence     |       | 1.1%    | 1.3%   | 1.5%    | 1.5%    |
| <b>Wave-1</b>            |       |         |        |         |         |
| N of patients at risk    | 3739  | 3494    | 3257   | 3137    | 3012    |
| N of patients with event |       | 52      | 74     | 78      | 81      |
| Cumulative incidence     |       | 1.4%    | 2.0%   | 2.2%    | 2.3%    |

**(C) Major bleeding**

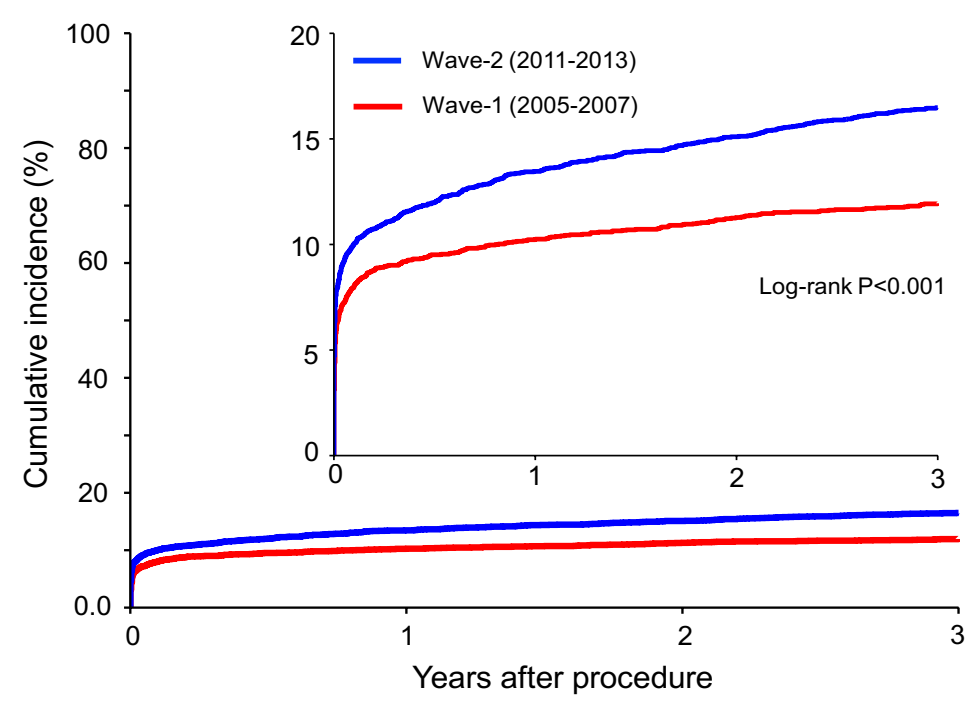

| Interval                 | 0 day | 30 days | 1 year | 2 years | 3 years |
|--------------------------|-------|---------|--------|---------|---------|
| <b>Wave-2</b>            |       |         |        |         |         |
| N of patients at risk    | 4723  | 4067    | 3665   | 3453    | 3276    |
| N of patients with event |       | 457     | 618    | 686     | 741     |
| Cumulative incidence     |       | 9.8%    | 13.5%  | 15.1%   | 16.5%   |
| <b>Wave-1</b>            |       |         |        |         |         |
| N of patients at risk    | 4278  | 3773    | 3485   | 3393    | 3180    |
| N of patients with event |       | 331     | 428    | 467     | 492     |
| Cumulative incidence     |       | 7.8%    | 10.3%  | 11.3%   | 12.0%   |

**(D) Any coronary revascularization**

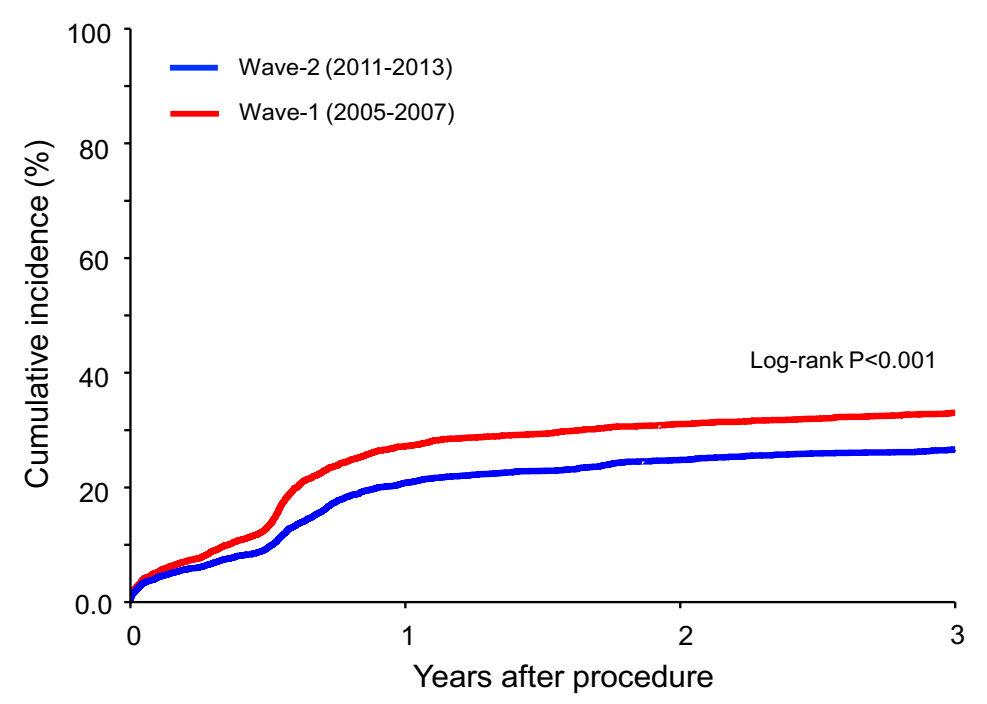

| Interval                 | 0 day | 30 days | 1 year | 2 years | 3 years |
|--------------------------|-------|---------|--------|---------|---------|
| <b>Wave-2</b>            |       |         |        |         |         |
| N of patients at risk    | 4723  | 4236    | 3210   | 2894    | 2690    |
| N of patients with event |       | 178     | 885    | 1043    | 1112    |
| Cumulative incidence     |       | 3.9%    | 20.8%  | 24.8%   | 26.6%   |
| <b>Wave-1</b>            |       |         |        |         |         |
| N of patients at risk    | 4278  | 3836    | 2735   | 2487    | 2298    |
| N of patients with event |       | 206     | 1066   | 1209    | 1277    |
| Cumulative incidence     |       | 5.0%    | 27.2%  | 31.1%   | 33.0%   |

1  
2  
3 **SUPPLEMENTARY MATERIAL**  
4  
5

6 **Table of contents**  
7

8  
9 **Supplementary Appendix (A-C) ..... 2**  
10

11 **Supplementary figure legends (I-IV) ..... 9**  
12  
13  
14  
15  
16  
17  
18  
19  
20  
21  
22  
23  
24  
25  
26  
27  
28  
29  
30  
31  
32  
33  
34  
35  
36  
37  
38  
39  
40  
41  
42  
43  
44  
45  
46  
47  
48  
49  
50  
51  
52  
53  
54  
55  
56  
57  
58  
59  
60

For peer review only

## Supplemental Appendix A: List of participating centers and investigators

### The CREDO-Kyoto AMI Registry Wave-1

#### Cardiology

Kyoto University Hospital: Takeshi Kimura, Hiroki Shiomi

Kishiwada City Hospital: Mitsuo Matsuda, Hirokazu Mitsuoka

Tenri Hospital: Yoshihisa Nakagawa

Hyogo Prefectural Amagasaki Hospital: Hisayoshi Fujiwara, Yoshiki Takatsu, Ryoji

Taniguchi

Kitano Hospital: Ryuji Nohara

Koto Memorial Hospital: Tomoyuki Murakami, Teruki Takeda

Kokura Memorial Hospital: Masakiyo Nobuyoshi, Masashi Iwabuchi

Maizuru Kyosai Hospital: Ryozo Tatami

Nara Hospital, Kinki University Faculty of Medicine: Manabu Shirovani

Kobe City Medical Center General Hospital: Toru Kita, Yutaka Furukawa, Natsuhiko Ehara

Nishi-Kobe Medical Center: Hiroshi Kato, Hiroshi Eizawa

Kansai Denryoku Hospital: Katsuhisa Ishii

Osaka Red Cross Hospital: Masaru Tanaka

University of Fukui Hospital: Jong-Dae Lee, Akira Nakano

Shizuoka City Shizuoka Hospital: Akinori Takizawa

Hamamatsu Rosai Hospital: Masaaki Takahashi

Shiga University of Medical Science Hospital: Minoru Horie, Hiroyuki Takashima

Japanese Red Cross Wakayama Medical Center: Takashi Tamura

Shimabara Hospital: Mamoru Takahashi

Kagoshima University Medical and Dental Hospital: Chuwa Tei, Shuichi Hamasaki

1  
2  
3 Shizuoka General Hospital: Hirofumi Kambara, Osamu Doi, Satoshi Kaburagi

4  
5 Kurashiki Central Hospital: Kazuaki Mitsudo, Kazushige Kadota

6  
7 Mitsubishi Kyoto Hospital: Shinji Miki, Tetsu Mizoguchi

8  
9 Kumamoto University Hospital: Hisao Ogawa, Seigo Sugiyama

10  
11 Shimada Municipal Hospital: Ryuichi Hattori, Takeshi Aoyama, Makoto Araki

12  
13 Juntendo University Shizuoka Hospital: Satoru Suwa

14  
15  
16  
17  
18  
19 **Cardiovascular Surgery**

20  
21 Kyoto University Hospital: Ryuzo Sakata, Tadashi Ikeda, Akira Marui

22  
23 Kishiwada City Hospital: Masahiko Onoe

24  
25 Tenri Hospital: Kazuo Yamanaka

26  
27 Hyogo Prefectural Amagasaki Hospital: Keiichi Fujiwara, Nobuhisa Ohno

28  
29 Kokura Memorial Hospital: Michiya Hanyu

30  
31 Maizuru Kyosai Hospital: Tsutomu Matsushita

32  
33 Nara Hospital, Kinki University Faculty of Medicine: Noboru Nishiwaki, Yuichi Yoshida

34  
35 Kobe City Medical Center General Hospital: Yukikatsu Okada, Michihiro Nasu

36  
37 Osaka Red Cross Hospital: Shogo Nakayama

38  
39 University of Fukui Hospital: Kuniyoshi Tanaka, Takaaki Koshiji, Koichi Morioka

40  
41 Shizuoka City Shizuoka Hospital: Mitsuomi Shimamoto, Fumio Yamazaki

42  
43 Hamamatsu Rosai Hospital: Junichiro Nishizawa

44  
45 Japanese Red Cross Wakayama Medical Center: Masaki Aota

46  
47 Shimabara Hospital: Takafumi Tabata

48  
49 Kagoshima University Medica and Dental Hospital: Yutaka Imoto, Hiroyuki Yamamoto

50  
51 Shizuoka General Hospital: Katsuhiko Matsuda, Masafumi Nara

52  
53 Kurashiki Central Hospital: Tatsuhiko Komiya



1  
2  
3 Mitsubishi Kyoto Hospital: Hiroyuki Nakajima  
4

5 Kumamoto University Hospital: Michio Kawasuji, Syuji Moriyama  
6

7  
8 Juntendo University Shizuoka Hospital: Keichi Tanbara  
9

10  
11  
12  
13  
14  
15  
16  
17  
18  
19  
20  
21  
22  
23  
24  
25  
26  
27  
28  
29  
30  
31  
32  
33  
34  
35  
36  
37  
38  
39  
40  
41  
42  
43  
44  
45  
46  
47  
48  
49  
50  
51  
52  
53  
54  
55  
56  
57  
58  
59  
60

For peer review only

## **The CREDO-Kyoto AMI Registry Wave-2**

### **Cardiology**

Kyoto University Hospital: Takeshi Kimura, Hiroki Shiomi

Kishiwada City Hospital: Mitsuo Matsuda, Takashi Uegaito

Tenri Hospital: Toshihiro Tamura

Hyogo Prefectural Amagasaki General Medical Center: Yukihiro Sato, Ryoji Taniguchi

Kitano Hospital: Moriaki Inoko

Koto Memorial Hospital: Tomoyuki Murakami, Teruki Takeda

Kokura Memorial Hospital: Kenji Ando, Takenori Domei

Kindai University Nara Hospital: Manabu Shirotani

Kobe City Medical Center General Hospital: Yutaka Furukawa, Natsuhiko Ehara

Kobe City Nishi-Kobe Medical Center: Hiroshi Eizawa

Kansai Denryoku Hospital: Katsuhisa Ishii, Eiji Tada

Osaka Red Cross Hospital: Masaru Tanaka, Tsukasa Inada

Shizuoka City Shizuoka Hospital: Tomoya Onodera, Ryuzo Nawada

Hamamatsu Rosai Hospital: Eiji Shinoda, Miho Yamada

Shiga University of Medical Science Hospital: Takashi Yamamoto, Hiroshi Sakai

Japanese Red Cross Wakayama Medical Center: Takashi Tamura, Mamoru Toyofuku

Shimabara Hospital: Mamoru Takahashi

Shizuoka General Hospital: Hiroki Sakamoto, Tomohisa Tada

Kurashiki Central Hospital: Kazushige Kadota, Takeshi Tada

Mitsubishi Kyoto Hospital: Shinji Miki, Kazuhisa Kaneda

Shimada Municipal Hospital: Takeshi Aoyama

Juntendo University Shizuoka Hospital: Satoru Suwa

**Cardiovascular Surgery**

Kyoto University Hospital: Kenji Minatoya, Kazuhiro Yamazaki

Kishiwada City Hospital: Tatsuya Ogawa

Tenri Hospital: Atsushi Iwakura

Hyogo Prefectural Amagasaki General Medical Center: Nobuhisa Ohno

Kitano Hospital: Michiya Hanyu

Kokura Memorial Hospital: Yoshiharu Soga, Akira Marui

Kindai University Nara Hospital: Nobushige Tamura

Kobe City Medical Center General Hospital: Tadaaki Koyama

Osaka Red Cross Hospital: Shogo Nakayama

Shizuoka City Shizuoka Hospital: Fumio Yamazaki, Yasuhiko Terai

Hamamatsu Rosai Hospital: Junichiro Nishizawa

Japanese Red Cross Wakayama Medical Center: Naoki Kanemitsu, Hiroyuki Hara

Shizuoka General Hospital: Hiroshi Tsuneyoshi

Kurashiki Central Hospital: Tatsuhiko Komiya

Mitsubishi Kyoto Hospital: Jiro Esaki

Juntendo University Shizuoka Hospital: Keiichi Tambara

1  
2  
3 **Supplemental Appendix B: List of clinical research coordinators**  
4

5 **The CREDO-Kyoto AMI Registry Wave-1**  
6

7  
8 Research Institute for Production Development  
9

10 Kumiko Kitagawa, Misato Yamauchi, Naoko Okamoto, Yumika Fujino, Saori Tezuka, Asuka

11  
12 Saeki, Miya Hanazawa, Yuki Sato, Chikako Hibi, Hitomi Sasae, Emi Takinami, Yuriko

13  
14 Uchida, Yuko Yamamoto, Satoko Nishida, Mai Yoshimoto, Sachiko Maeda, Izumi Miki,  
15

16  
17 Saeko Minematsu  
18  
19  
20

21 **The CREDO-Kyoto AMI Registry Wave-2**  
22

23  
24 Research Institute for Production Development  
25

26 Sakiko Arimura, Yumika Fujino, Miya Hanazawa, Chikako Hibi, Risa Kato, Yui Kinoshita,  
27

28 Kumiko Kitagawa, Masayo Kitamura, Takahiro Kuwahara, Satoko Nishida, Naoko Okamoto,  
29

30 Yuki Sato, Saori Tezuka, Marina Tsuda, Miyuki Tsumori, Misato Yamauchi, Itsuki  
31

32  
33 Yamazaki  
34  
35  
36  
37  
38  
39  
40  
41  
42  
43  
44  
45  
46  
47  
48  
49  
50  
51  
52  
53  
54  
55  
56  
57  
58  
59  
60

## Supplemental Appendix C: List of the clinical event committee members

### The CREDO-Kyoto AMI Registry Wave-1

Mitsuru Abe (Kyoto Medical Center), Hiroki Shiomi (Kyoto University Hospital), Tomohisa Tada (Deutsches Herzzentrum), Junichi Tazaki (Kyoto University Hospital), Yoshihiro Kato (Saiseikai Noe Hospital), Mamoru Hayano (Gunma Cardiovascular Center), Akihiro Tokushige (Kagoshima University Hospital), Masahiro Natsuaki (Kyoto University Hospital), Tetsu Nakajima (Kyoto University Hospital).

### The CREDO-Kyoto AMI Registry Wave-2

Masayuki Fuki (Kyoto University Hospital), Eri Toda Kato (Kyoto University Hospital), Yukiko Matsumura-Nakano (Kyoto University Hospital), Kenji Nakatsuma (Mitsubishi Kyoto Hospital), Hiroki Shiomi (Kyoto University Hospital), Yasuaki Takeji (Kyoto University Hospital), Hidenori Yaku (Mitsubishi Kyoto Hospital), Erika Yamamoto (Kyoto University Hospital), Ko Yamamoto (Kyoto University Hospital), Yugo Yamashita (Kyoto University Hospital), Yusuke Yoshikawa (Kyoto University Hospital), Hiroki Watanabe (Japanese Red Cross Wakayama Medical Center)

## Supplementary figure legends

**Supplemental Figure I. Landmark analysis within and beyond 30 days for all-cause death comparing between Wave-1 and Wave-2 in (A) entire study population, (B) patients with cardiogenic shock, and (C) patients without cardiogenic shock**

HR=hazard ratio; CI=confidence interval.

**Supplemental Figure II. Landmark analysis within and beyond 30 days for major bleeding comparing between Wave-1 and Wave-2**

Major bleeding was defined as GUSTO moderate/severe bleeding.

HR=hazard ratio; CI=confidence interval; GUSTO=global utilization of streptokinase and tissue plasminogen activator for occluded coronary arteries.

**Supplemental Figure III . Kaplan-Meier curves for major bleeding comparing between Wave-1 and Wave-2 (A) in patients with ARC-HBR and (B) in patients without ARC-HBR**

ARC-HBR=academic research consortium-high bleeding risk; HR=hazard ratio; CI=confidence interval.

**Supplemental Figure IV. Kaplan-Meier curves for persistent DAPT discontinuation comparing between Wave-1 and Wave-2**

Persistent discontinuation of DAPT was defined as withdrawal of either thienopyridines or aspirin for at least 2 months.

DAPT=dual antiplatelet therapy.

1 Supplemental Figure I. Landmark analysis within and beyond 30 days for all-cause  
 2 death comparing between Wave-1 and Wave-2 (A) in entire study population, (B) in  
 3 patients with cardiogenic shock, and (C) in patients without cardiogenic shock

(A) All-cause death in entire study population



| Interval                 | 0 day | 7 days | 30 days | 1 year | 2 years | 3 years |
|--------------------------|-------|--------|---------|--------|---------|---------|
| <b>Wave-2</b>            |       |        |         |        |         |         |
| N of patients at risk    | 4723  | 4551   | 4395    | 4041   | 3858    | 3685    |
| N of patients with event | 183   | 280    | 222     | 328    | 442     | 442     |
| Cumulative incidence     |       | 3.9%   | 5.9%    | 5.1%   | 7.6%    | 10.4%   |
| <b>Wave-1</b>            |       |        |         |        |         |         |
| N of patients at risk    | 4278  | 4137   | 4023    | 3744   | 3602    | 3454    |
| N of patients with event | 154   | 235    | 223     | 329    | 419     | 419     |
| Cumulative incidence     |       | 3.6%   | 5.5%    | 5.6%   | 8.3%    | 10.6%   |

(B) All-cause death in patients with cardiogenic shock



| Interval                 | 0 day | 7 days | 30 days | 1 year | 2 years | 3 years |
|--------------------------|-------|--------|---------|--------|---------|---------|
| <b>Wave-2</b>            |       |        |         |        |         |         |
| N of patients at risk    | 757   | 629    | 556     | 446    | 407     | 375     |
| N of patients with event | 136   | 193    | 73      | 100    | 123     | 123     |
| Cumulative incidence     |       | 18.0%  | 25.6%   | 13.7%  | 19.0%   | 23.6%   |
| <b>Wave-1</b>            |       |        |         |        |         |         |
| N of patients at risk    | 596   | 506    | 450     | 370    | 346     | 317     |
| N of patients with event | 100   | 143    | 74      | 96     | 114     | 114     |
| Cumulative incidence     |       | 16.8%  | 24.0%   | 16.6%  | 21.5%   | 25.7%   |

(C) All-cause death in patients without cardiogenic shock



| Interval                 | 0 day | 7 days | 30 days | 1 year | 2 years | 3 years |
|--------------------------|-------|--------|---------|--------|---------|---------|
| <b>Wave-2</b>            |       |        |         |        |         |         |
| N of patients at risk    | 3966  | 3922   | 3839    | 3595   | 3451    | 3310    |
| N of patients with event | 47    | 87     | 149     | 228    | 319     | 319     |
| Cumulative incidence     |       | 1.2%   | 2.2%    | 3.9%   | 6.1%    | 8.6%    |
| <b>Wave-1</b>            |       |        |         |        |         |         |
| N of patients at risk    | 3682  | 3631   | 3573    | 3374   | 3256    | 3137    |
| N of patients with event | 54    | 92     | 149     | 233    | 305     | 305     |
| Cumulative incidence     |       | 1.5%   | 2.5%    | 4.2%   | 6.6%    | 8.7%    |

1 Supplemental Figure II. Landmark analysis within and beyond 30 days for major  
 2 bleeding comparing between Wave-1 and Wave-2

8 Major bleeding



| Interval                 | 0 day | 7 days | 30 days | 1 year | 2 years | 3 years |
|--------------------------|-------|--------|---------|--------|---------|---------|
| <b>Wave-2</b>            |       |        |         |        |         |         |
| N of patients at risk    | 4723  | 4234   | 4067    | 3665   | 3453    | 3276    |
| N of patients with event |       | 383    | 457     | 161    | 229     | 284     |
| Cumulative incidence     |       | 8.2%   | 9.8%    | 4.1%   | 5.9%    | 7.4%    |
| <b>Wave-1</b>            |       |        |         |        |         |         |
| N of patients at risk    | 4278  | 3909   | 3773    | 3485   | 3333    | 3189    |
| N of patients with event |       | 272    | 331     | 97     | 136     | 161     |
| Cumulative incidence     |       | 6.4%   | 7.8%    | 2.6%   | 3.7%    | 4.5%    |

3



1 Supplemental Figure III. Kaplan-Meier curves for major bleeding comparing between Wave-1 and Wave-2 for major bleeding (A) in  
 2 patients with ARC-HBR and (B) in patients without ARC-HBR

(A) Major bleeding in patients with ARC-HBR



| Interval                 | 0 day | 30 days | 1 year | 2 years | 3 years |
|--------------------------|-------|---------|--------|---------|---------|
| <b>Wave-2</b>            |       |         |        |         |         |
| N of patients at risk    | 2213  | 1736    | 1454   | 1308    | 1199    |
| N of patients with event |       | 322     | 430    | 476     | 508     |
| Cumulative incidence     |       | 14.8%   | 20.4%  | 23.0%   | 25.0%   |
| <b>Wave-1</b>            |       |         |        |         |         |
| N of patients at risk    | 1811  | 1451    | 1259   | 1170    | 1082    |
| N of patients with event |       | 237     | 293    | 313     | 328     |
| Cumulative incidence     |       | 13.4%   | 16.8%  | 18.2%   | 19.3%   |

(B) Major bleeding in patients without ARC-HBR



| Interval                 | 0 day | 30 days | 1 year | 2 years | 3 years |
|--------------------------|-------|---------|--------|---------|---------|
| <b>Wave-2</b>            |       |         |        |         |         |
| N of patients at risk    | 2510  | 2331    | 2211   | 2145    | 2077    |
| N of patients with event |       | 135     | 188    | 210     | 233     |
| Cumulative incidence     |       | 5.4%    | 7.6%   | 8.5%    | 9.5%    |
| <b>Wave-1</b>            |       |         |        |         |         |
| N of patients at risk    | 2467  | 2322    | 2226   | 2163    | 2107    |
| N of patients with event |       | 94      | 135    | 154     | 164     |
| Cumulative incidence     |       | 3.8%    | 5.5%   | 6.4%    | 6.8%    |

3

4

1 Supplemental Figure IV. Kaplan-Meier curves for persistent DAPT discontinuation  
 2 comparing between Wave-1 and Wave-2

8 **Persistent DAPT discontinuation**



| Interval              | 0 day | 30 days | 1 year | 2 years | 3 years | 4 years | 5 years |
|-----------------------|-------|---------|--------|---------|---------|---------|---------|
| <b>Wave-2</b>         |       |         |        |         |         |         |         |
| N of patients at risk | 4625  | 3987    | 2603   | 1716    | 1272    | 971     | 700     |
| Cumulative incidence  |       | 9.6%    | 37.2%  | 56.9%   | 66.7%   | 73.2%   | 77.5%   |
| <b>Wave-1</b>         |       |         |        |         |         |         |         |
| N of patients at risk | 4180  | 3093    | 1457   | 1186    | 1029    | 849     | 442     |
| Cumulative incidence  |       | 23.7%   | 61.2%  | 67.3%   | 70.1%   | 73.4%   | 76.7%   |

3  
4  
5  
6  
7

STROBE Statement—Checklist of items that should be included in reports of *cohort studies*

|                              | Item No | Recommendation                                                                                                                                                                                    | Page No |
|------------------------------|---------|---------------------------------------------------------------------------------------------------------------------------------------------------------------------------------------------------|---------|
| <b>Title and abstract</b>    | 1       | (a) Indicate the study's design with a commonly used term in the title or the abstract                                                                                                            | 1       |
|                              |         | (b) Provide in the abstract an informative and balanced summary of what was done and what was found                                                                                               | 4       |
| <b>Introduction</b>          |         |                                                                                                                                                                                                   |         |
| Background/rationale         | 2       | Explain the scientific background and rationale for the investigation being reported                                                                                                              | 7       |
| Objectives                   | 3       | State specific objectives, including any prespecified hypotheses                                                                                                                                  | 7       |
| <b>Methods</b>               |         |                                                                                                                                                                                                   |         |
| Study design                 | 4       | Present key elements of study design early in the paper                                                                                                                                           | 8       |
| Setting                      | 5       | Describe the setting, locations, and relevant dates, including periods of recruitment, exposure, follow-up, and data collection                                                                   | 8       |
| Participants                 | 6       | (a) Give the eligibility criteria, and the sources and methods of selection of participants. Describe methods of follow-up                                                                        | 8-9     |
|                              |         | (b) For matched studies, give matching criteria and number of exposed and unexposed                                                                                                               | 8-9     |
| Variables                    | 7       | Clearly define all outcomes, exposures, predictors, potential confounders, and effect modifiers. Give diagnostic criteria, if applicable                                                          | 9       |
| Data sources/<br>measurement | 8*      | For each variable of interest, give sources of data and details of methods of assessment (measurement). Describe comparability of assessment methods if there is more than one group              | 9       |
| Bias                         | 9       | Describe any efforts to address potential sources of bias                                                                                                                                         | 9       |
| Study size                   | 10      | Explain how the study size was arrived at                                                                                                                                                         | 9       |
| Quantitative variables       | 11      | Explain how quantitative variables were handled in the analyses. If applicable, describe which groupings were chosen and why                                                                      | 9       |
| Statistical methods          | 12      | (a) Describe all statistical methods, including those used to control for confounding                                                                                                             | 11      |
|                              |         | (b) Describe any methods used to examine subgroups and interactions                                                                                                                               | 11      |
|                              |         | (c) Explain how missing data were addressed                                                                                                                                                       | 11      |
|                              |         | (d) If applicable, explain how loss to follow-up was addressed                                                                                                                                    | 11      |
|                              |         | (e) Describe any sensitivity analyses                                                                                                                                                             | N/A     |
| <b>Results</b>               |         |                                                                                                                                                                                                   |         |
| Participants                 | 13*     | (a) Report numbers of individuals at each stage of study—eg numbers potentially eligible, examined for eligibility, confirmed eligible, included in the study, completing follow-up, and analysed | 8       |
|                              |         | (b) Give reasons for non-participation at each stage                                                                                                                                              | 8       |
|                              |         | (c) Consider use of a flow diagram                                                                                                                                                                | 8       |
| Descriptive data             | 14*     | (a) Give characteristics of study participants (eg demographic, clinical, social) and information on exposures and potential confounders                                                          | 13      |
|                              |         | (b) Indicate number of participants with missing data for each variable of interest                                                                                                               | 13      |
|                              |         | (c) Summarise follow-up time (eg, average and total amount)                                                                                                                                       | 11      |
| Outcome data                 | 15*     | Report numbers of outcome events or summary measures over time                                                                                                                                    | 14      |

|    |                          |    |                                                                                                                                                                                                              |       |
|----|--------------------------|----|--------------------------------------------------------------------------------------------------------------------------------------------------------------------------------------------------------------|-------|
| 1  | Main results             | 16 | (a) Give unadjusted estimates and, if applicable, confounder-adjusted estimates and their precision (eg, 95% confidence interval). Make clear which confounders were adjusted for and why they were included | 14    |
| 2  |                          |    | (b) Report category boundaries when continuous variables were categorized                                                                                                                                    | 14    |
| 3  |                          |    | (c) If relevant, consider translating estimates of relative risk into absolute risk for a meaningful time period                                                                                             | 14    |
| 4  |                          |    |                                                                                                                                                                                                              |       |
| 5  |                          |    |                                                                                                                                                                                                              |       |
| 6  | Other analyses           | 17 | Report other analyses done—eg analyses of subgroups and interactions, and sensitivity analyses                                                                                                               | 14    |
| 7  |                          |    |                                                                                                                                                                                                              |       |
| 8  |                          |    |                                                                                                                                                                                                              |       |
| 9  |                          |    |                                                                                                                                                                                                              |       |
| 10 |                          |    |                                                                                                                                                                                                              |       |
| 11 | <b>Discussion</b>        |    |                                                                                                                                                                                                              |       |
| 12 | Key results              | 18 | Summarise key results with reference to study objectives                                                                                                                                                     | 15    |
| 13 | Limitations              | 19 | Discuss limitations of the study, taking into account sources of potential bias or imprecision. Discuss both direction and magnitude of any potential bias                                                   | 17    |
| 14 |                          |    |                                                                                                                                                                                                              |       |
| 15 | Interpretation           | 20 | Give a cautious overall interpretation of results considering objectives, limitations, multiplicity of analyses, results from similar studies, and other relevant evidence                                   | 16-17 |
| 16 |                          |    |                                                                                                                                                                                                              |       |
| 17 | Generalisability         | 21 | Discuss the generalisability (external validity) of the study results                                                                                                                                        | 17    |
| 18 |                          |    |                                                                                                                                                                                                              |       |
| 19 |                          |    |                                                                                                                                                                                                              |       |
| 20 | <b>Other information</b> |    |                                                                                                                                                                                                              |       |
| 21 | Funding                  | 22 | Give the source of funding and the role of the funders for the present study and, if applicable, for the original study on which the present article is based                                                | 24    |
| 22 |                          |    |                                                                                                                                                                                                              |       |
| 23 |                          |    |                                                                                                                                                                                                              |       |
| 24 |                          |    |                                                                                                                                                                                                              |       |

\*Give information separately for exposed and unexposed groups.

**Note:** An Explanation and Elaboration article discusses each checklist item and gives methodological background and published examples of transparent reporting. The STROBE checklist is best used in conjunction with this article (freely available on the Web sites of PLoS Medicine at <http://www.plosmedicine.org/>, Annals of Internal Medicine at <http://www.annals.org/>, and Epidemiology at <http://www.epidem.com/>). Information on the STROBE Initiative is available at <http://www.strobe-statement.org>.
